# Supplementary material for: Replacing piperidine in solid phase peptide synthesis: effective Fmoc removal by alternative bases
Source: Royal Society of Chemistry journal article supplement (doi:10.1039/d1gc02634h), 2021-01-01

## Electronic Supplementary Information

# Replacing piperidine in Solid Phase Peptide Synthesis: effective Fmoc removal by alternative bases

Giulia Martelli,<sup>a</sup> Paolo Cantelmi,<sup>a</sup> Chiara Palladino,<sup>a</sup> Alexia Mattellone,<sup>a</sup> Dario Corbisiero,<sup>a</sup> Tommaso Fantoni,<sup>a</sup> Alessandra Tolomelli,<sup>a\*</sup> Marco Macis,<sup>b</sup> Antonio Ricci,<sup>b</sup> Walter Cabri,<sup>a\*</sup> Lucia Ferrazzano<sup>a</sup>

<sup>a</sup>*P4i Lab, Department of Chemistry, Alma Mater Studiorum University of Bologna, Via Selmi 2, 40126, Bologna (Italy).*

<sup>b</sup>*Innovation and Development, Fresenius kabi iPsum, via San Leonardo 23, 45010-RO, Italy.*

## Table of contents

|                                                                             |     |
|-----------------------------------------------------------------------------|-----|
| Deprotection kinetic tests .....                                            | S2  |
| Deprotection mechanism .....                                                | S9  |
| Racemization tests .....                                                    | S19 |
| Aspartimide formation .....                                                 | S26 |
| (L)-dihydroorotic fragment isomerization .....                              | S39 |
| SPPS of Aib-Enkephalin in NOP .....                                         | S44 |
| SPPS of linear Octreotide .....                                             | S50 |
| Solvent and base recovery from waste stream of linear Octreotide SPPS ..... | S57 |

## Deprotection kinetic tests

Selected examples of deprotection kinetic tests in all investigated pyrrolidones and bases are reported below. Only times (in minutes) revealing complete Fmoc removal were chosen.

**Figure S1.** Chromatogram of Fmoc-Phe-OH deprotection in DMF at t=0 (before base addition)

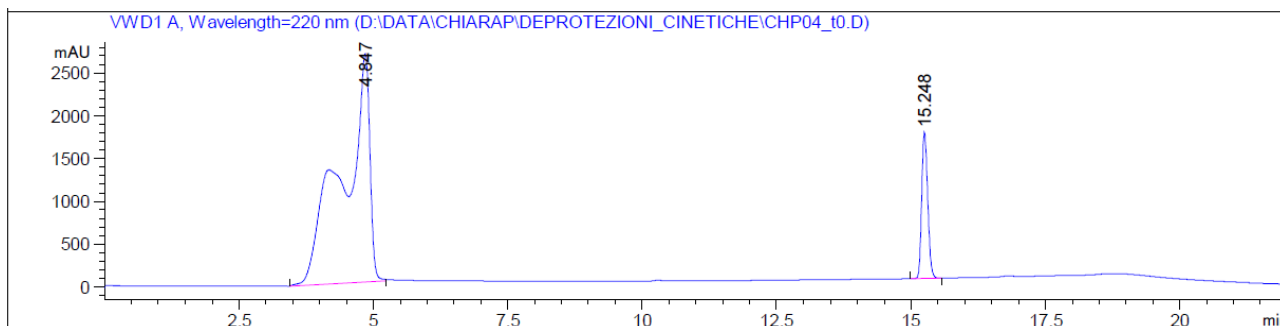

*Legend: DMF = peak at 4.847 min; Fmoc-Phe-OH = peak at 15.248 min.*

**Figure S2.** Chromatogram of Fmoc-Phe-OH deprotection in DMF with 5% piperidine at t=6 minutes

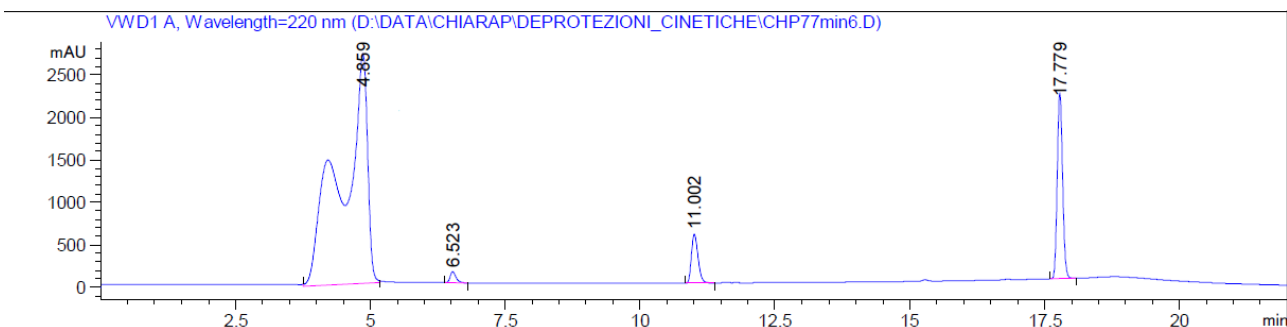

*Legend: DMF = peak at 4.859 min; H-Phe-OH = peak at 6.523 min; DBF-piperidine adduct = peak at 11.002 min; dibenzofulvene (DBF) = peak at 17.779 min.*

**Figure S3.** Chromatogram of Fmoc-Phe-OH deprotection in DMF with 20% TBA at t=6 minutes

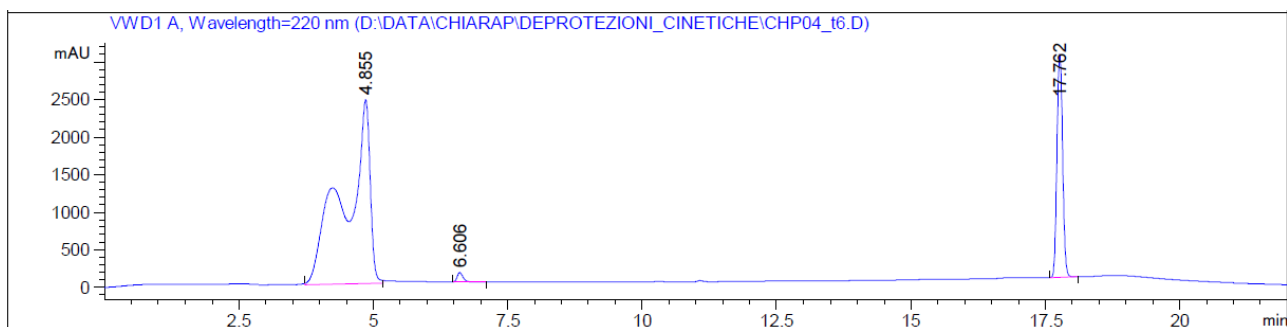

*Legend: DMF = peak at 4.855 min; H-Phe-OH = peak at 6.606 min; dibenzofulvene (DBF) = peak at 17.762 min.*

**Figure S4.** Chromatogram of Fmoc-Phe-OH deprotection in DMF with 5% TMG at t=8 minutes

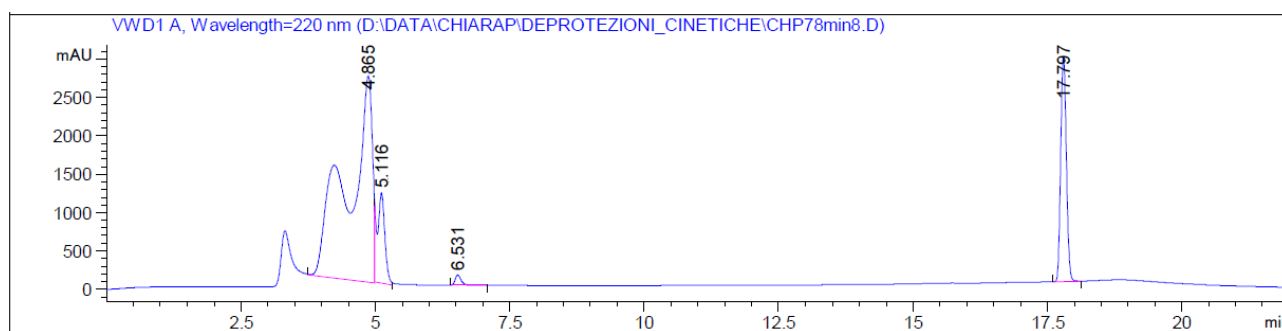

Legend: DMF = peak at 4.865 min; TMG = peak at 5.116 min; H-Phe-OH = peak at 6.531 min; dibenzofulvene (DBF) = peak at 17.797 min.

**Figure S5.** Chromatogram of Fmoc-Phe-OH deprotection in DMF with 10% DEAPA at t=10 minutes

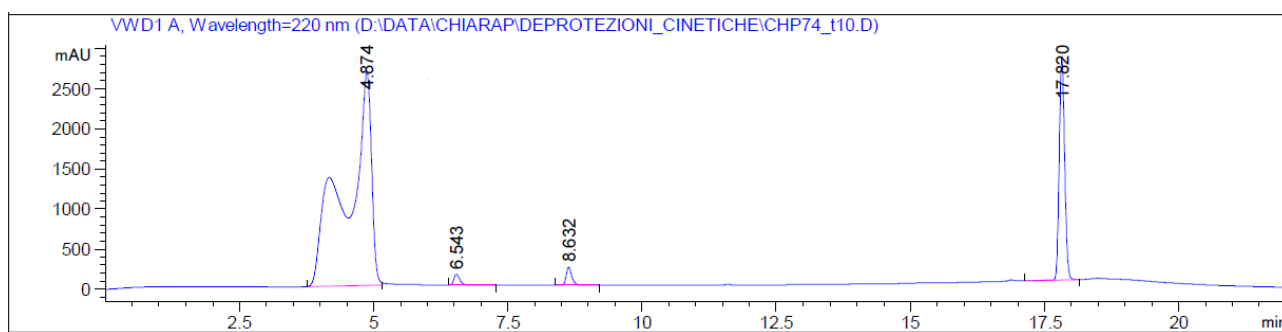

Legend: DMF = peak at 4.874 min; H-Phe-OH = peak at 6.543 min; DBF-DEAPA adduct = peak at 8.632 min; dibenzofulvene (DBF) = peak at 17.820 min.

**Figure S6.** Chromatogram of Fmoc-Phe-OH deprotection in NBP at t=0 (before base addition)

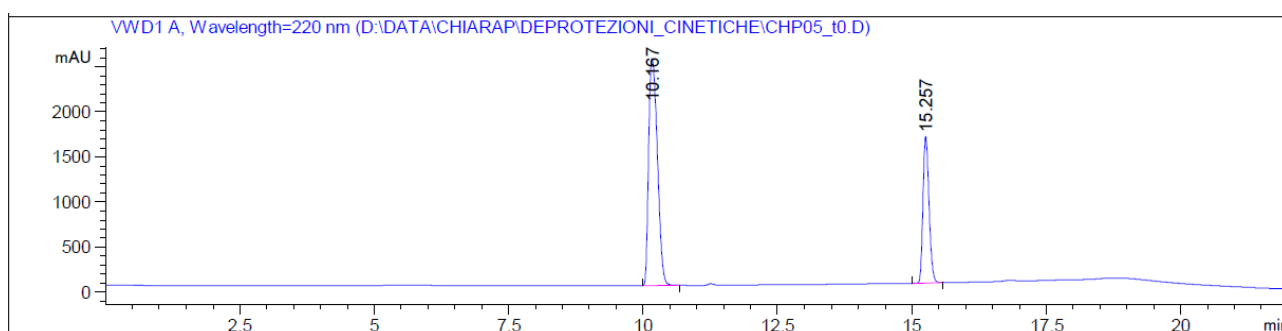

Legend: NBP = peak at 10.167 min; Fmoc-Phe-OH = peak at 15.257 min.

**Figure S7.** Chromatogram of Fmoc-Phe-OH deprotection in NBP with 5% piperidine at t=8 minutes

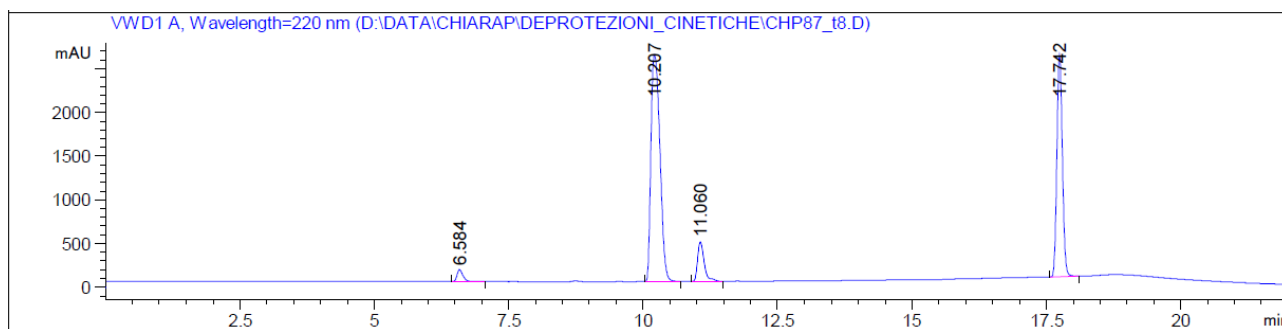

*Legend: H-Phe-OH = peak at 6.584 min; NBP = peak at 10.207 min; DBF-piperidine adduct = peak at 11.060 min; dibenzofulvene (DBF) = peak at 17.742 min.*

**Figure S8.** Chromatogram of Fmoc-Phe-OH deprotection in NBP with 20% TBA at t=6 minutes

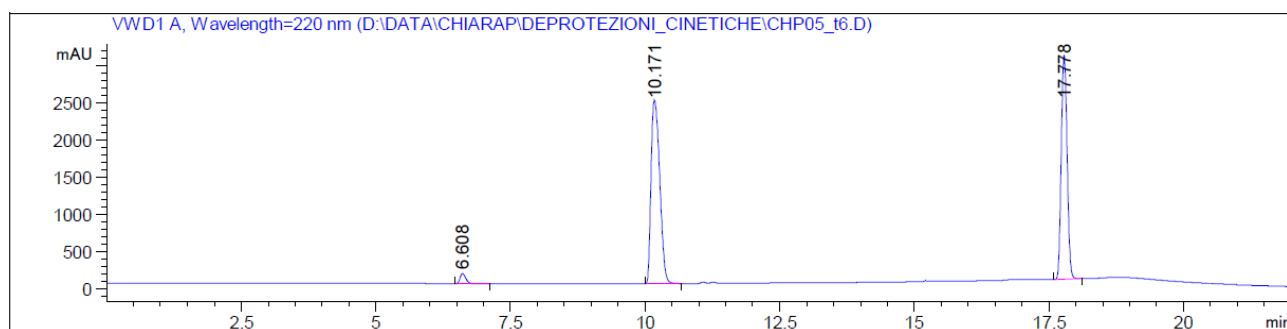

*Legend: H-Phe-OH = peak at 6.608 min; NBP = peak at 10.171 min; dibenzofulvene (DBF) = peak at 17.778 min.*

**Figure S9.** Chromatogram of Fmoc-Phe-OH deprotection in NBP with 5% TMG at t=8 minutes

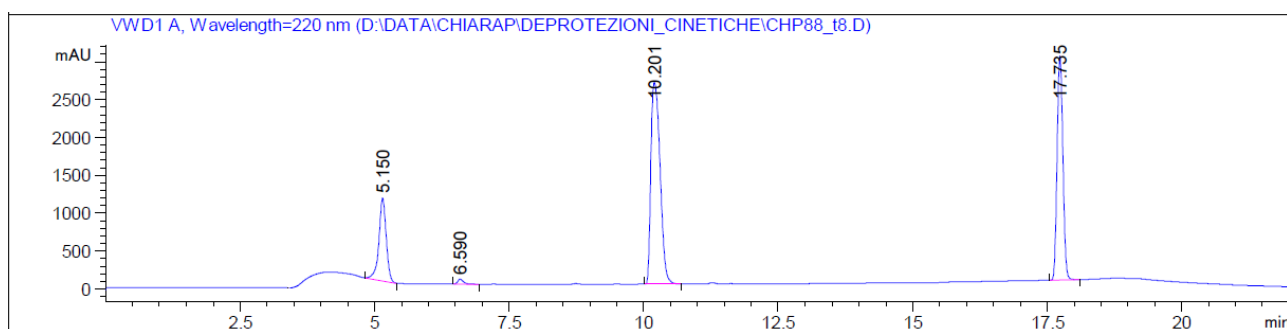

*Legend: TMG = peak at 5.150 min; H-Phe-OH = peak at 6.590 min; NBP = peak at 10.201 min; dibenzofulvene (DBF) = peak at 17.735 min.*

**Figure S10.** Chromatogram of Fmoc-Phe-OH deprotection in NBP with 10% DEAPA at t=15 minutes

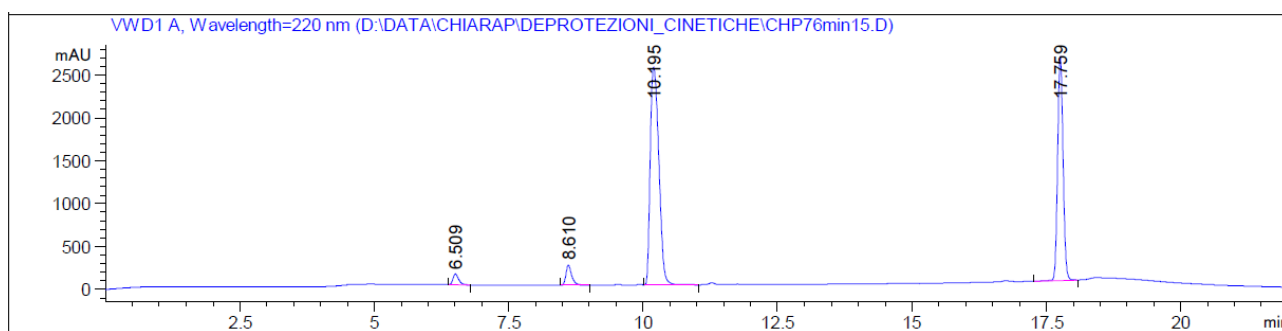

*Legend: H-Phe-OH = peak at 6.509 min; DBF-DEAPA adduct = peak at 8.610 min; NBP = peak at 10.195 min; dibenzofulvene (DBF) = peak at 17.759 min.*

**Figure S11.** Chromatogram of Fmoc-Phe-OH deprotection in NOP at t=0 (before base addition)

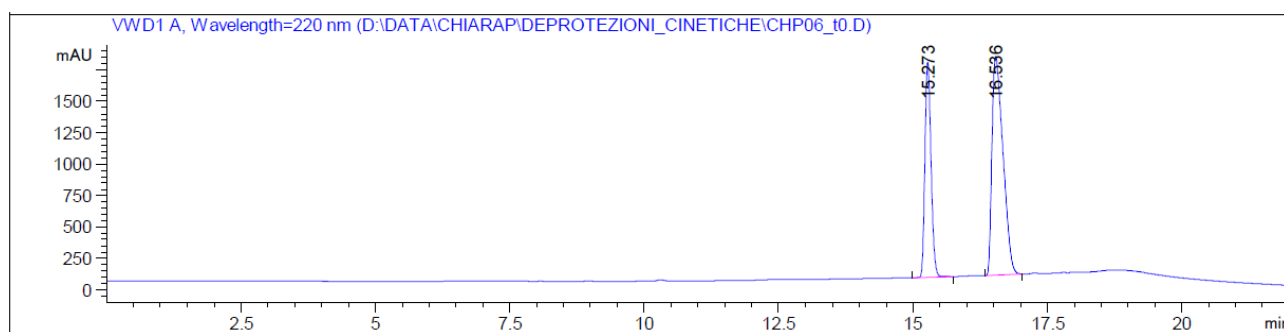

*Legend: Fmoc-Phe-OH = peak at 15.273 min; NOP = peak at 16.536 min.*

**Figure S12.** Chromatogram of Fmoc-Phe-OH deprotection in NOP with 5% piperidine at t=6 minutes

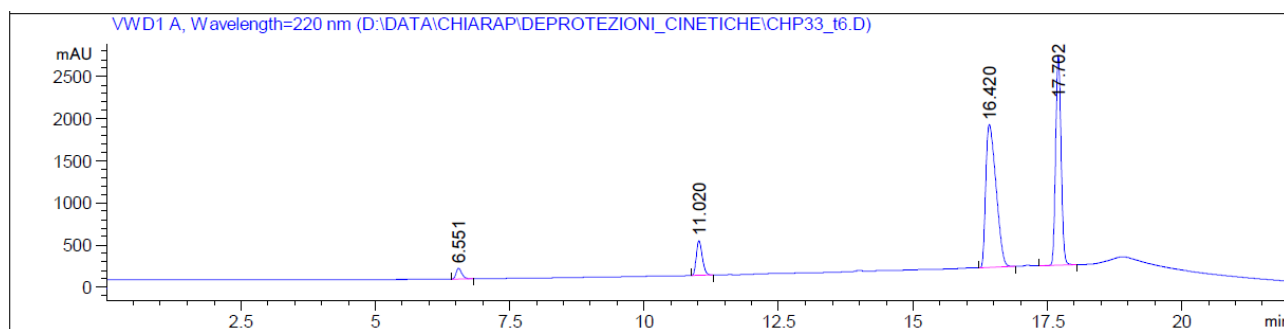

*Legend: H-Phe-OH = peak at 6.551 min; DBF-piperidine adduct = peak at 11.020 min; NOP = peak at 16.420 min; dibenzofulvene (DBF) = peak at 17.702 min.*

**Figure S13.** Chromatogram of Fmoc-Phe-OH deprotection in NOP with 20% TBA at t=10 minutes

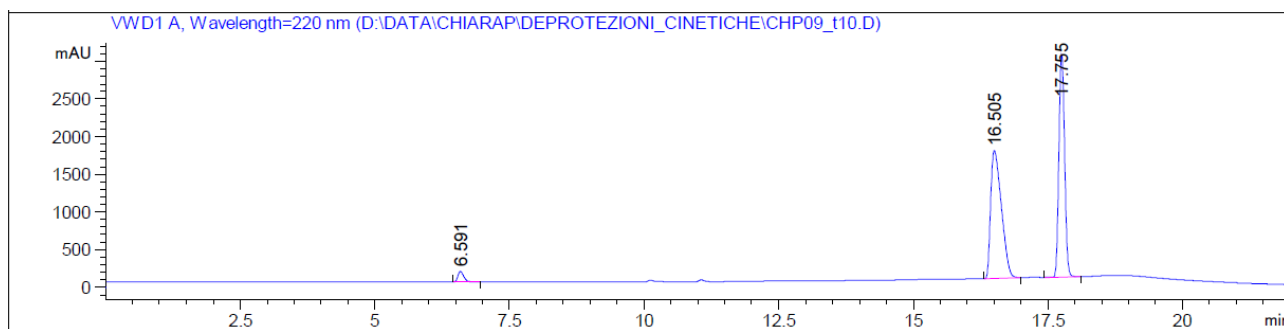

Legend: H-Phe-OH = peak at 6.591 min; NOP = peak at 16.505 min; dibenzofulvene (DBF) = peak at 17.755 min.

**Figure S14.** Chromatogram of Fmoc-Phe-OH deprotection in NOP with 5% TMG at t=6 minutes

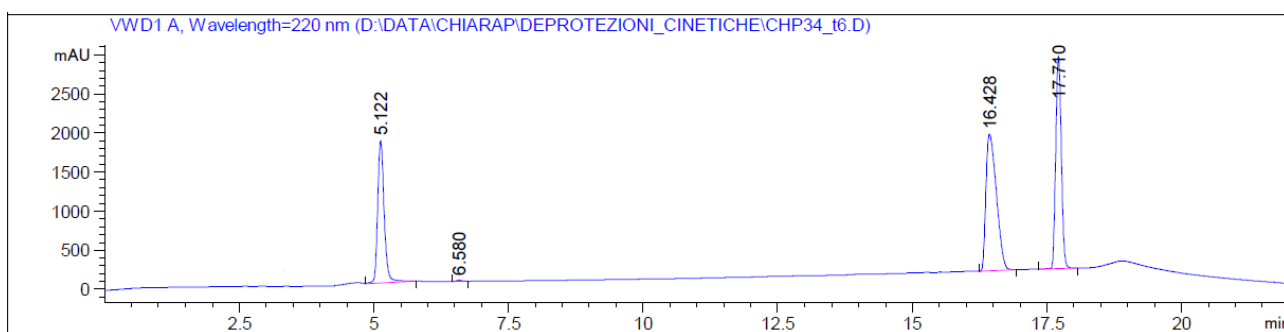

Legend: TMG = peak at 5.122 min; H-Phe-OH = peak at 6.580 min; NOP = peak at 16.428 min; dibenzofulvene (DBF) = peak at 17.710 min.

**Figure S15.** Chromatogram of Fmoc-Phe-OH deprotection in NOP with 10% DEAPA at t=10 minutes

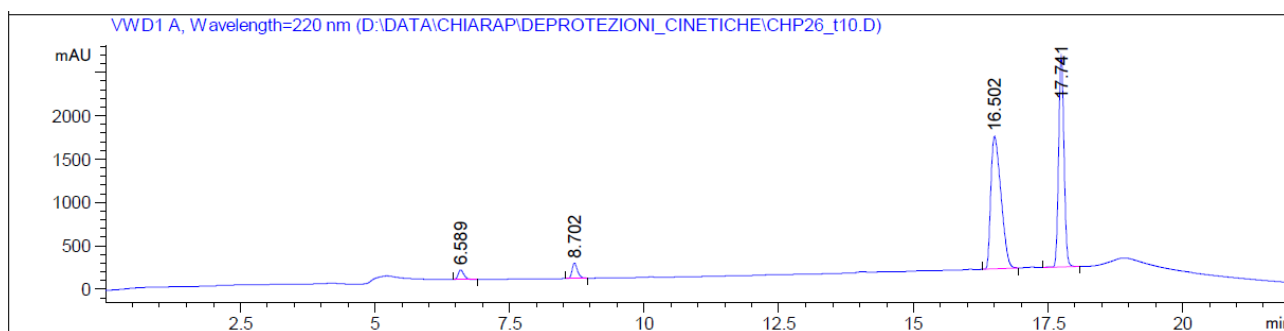

Legend: H-Phe-OH = peak at 6.589 min; DBF-DEAPA adduct = peak at 8.702 min; NOP = peak at 16.502 min; dibenzofulvene (DBF) = peak at 17.741 min.

**Figure S16.** Mass spectrum of Fmoc-Phe-OH

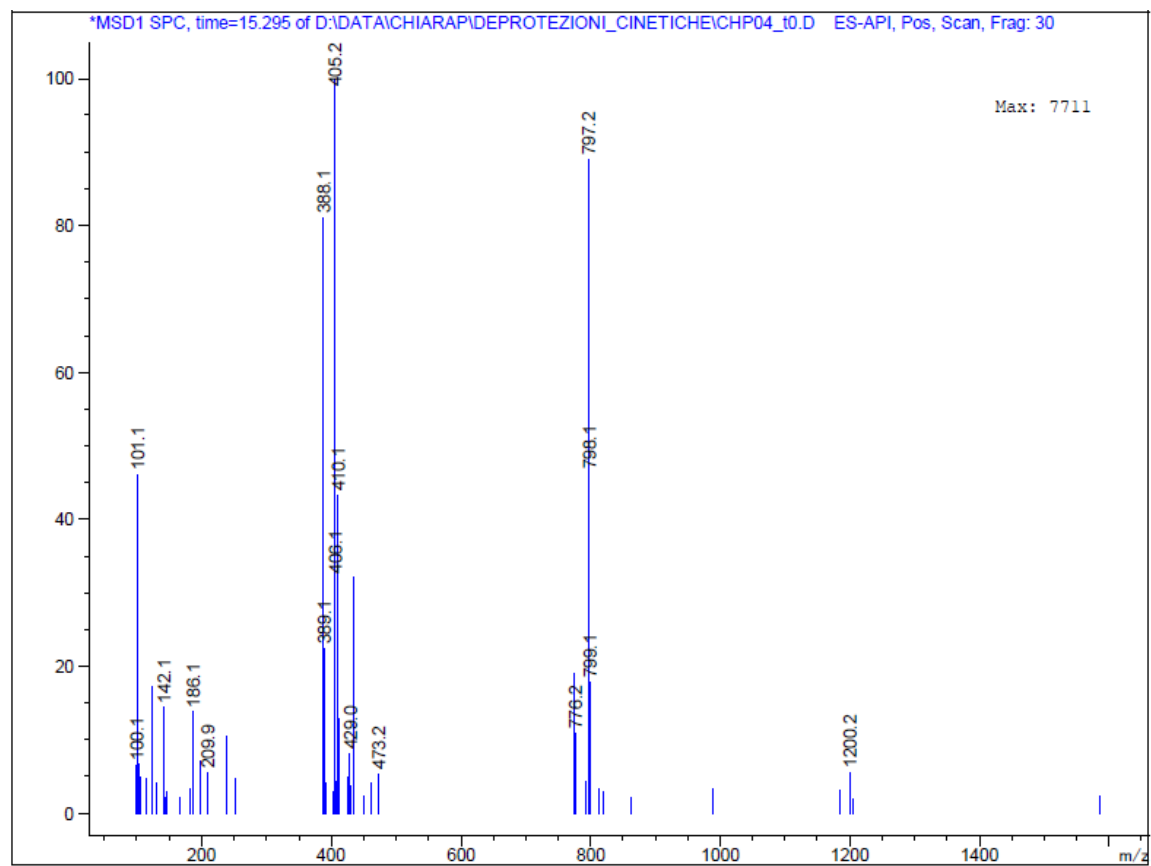

**Figure S17.** Mass spectrum of H-Phe-OH

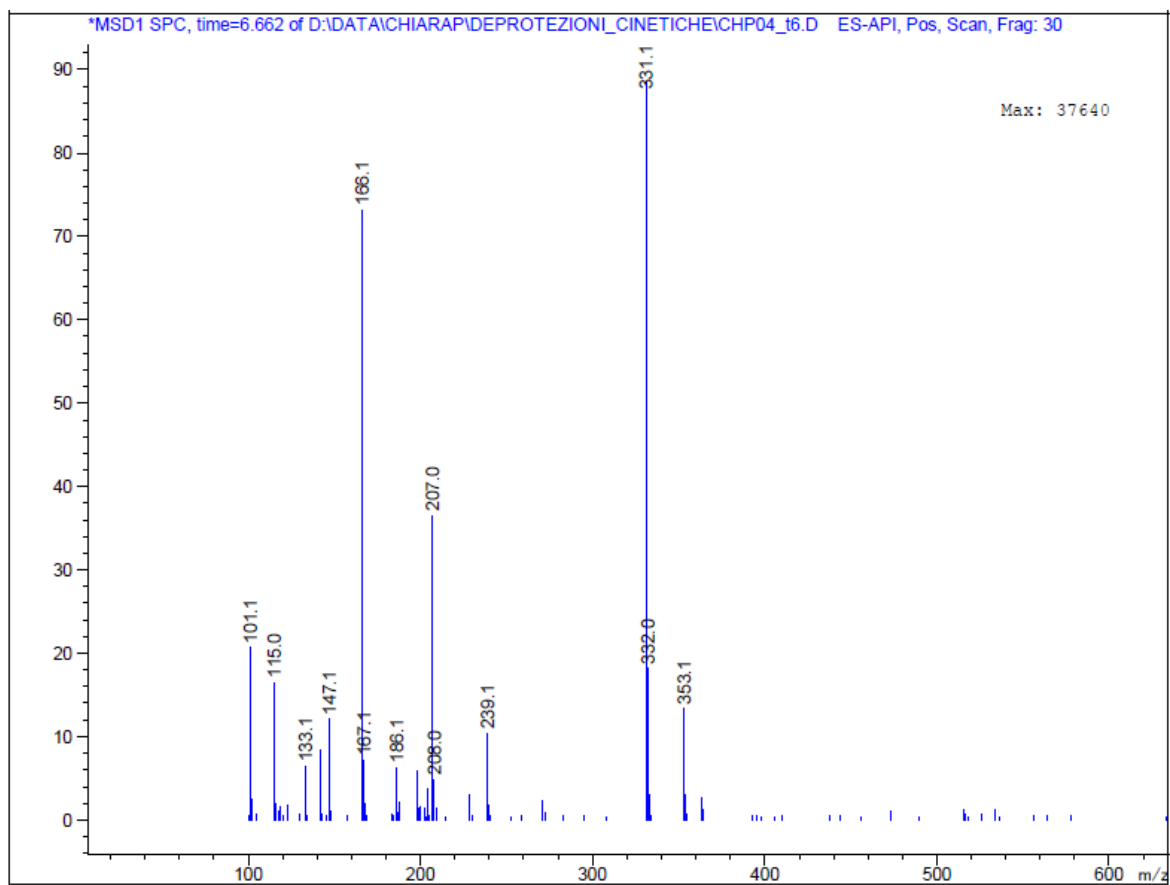

**Figure S18.** Mass spectrum of DBF-piperidine adduct

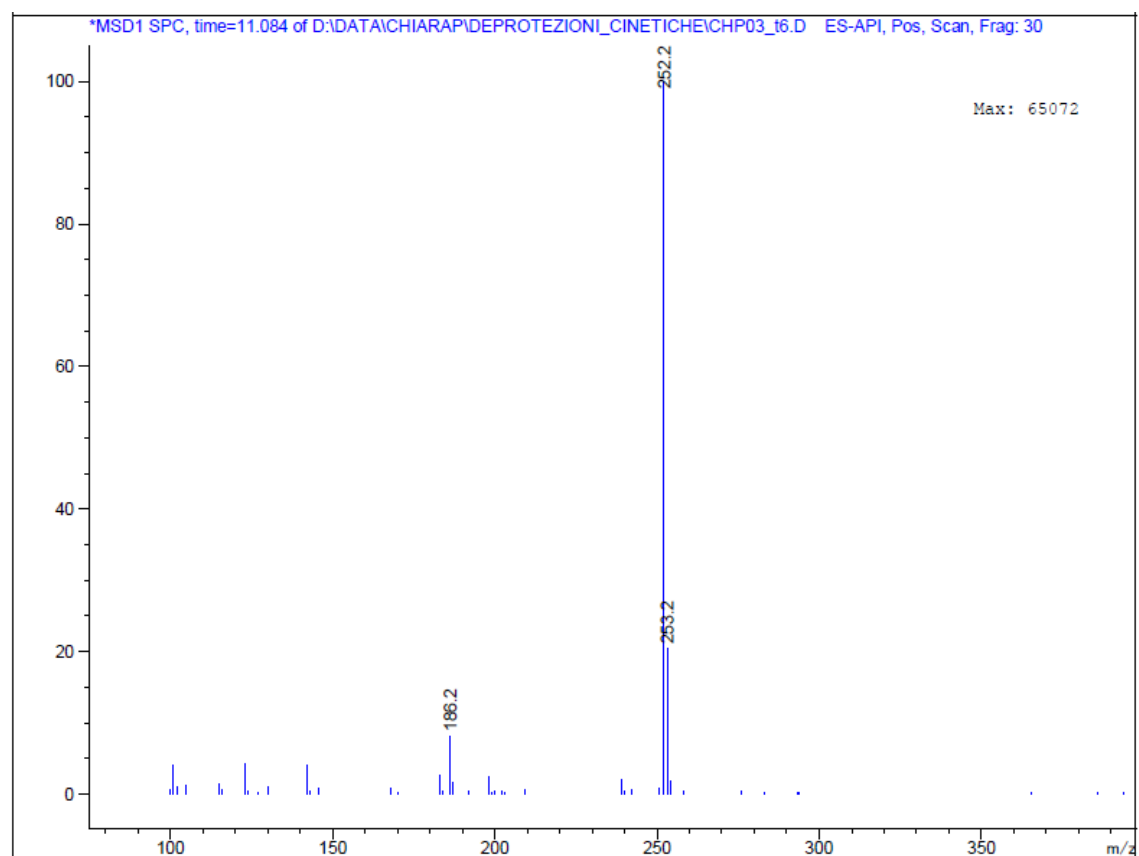

**Figure S19.** Mass spectrum of DBF-DEAPA adduct

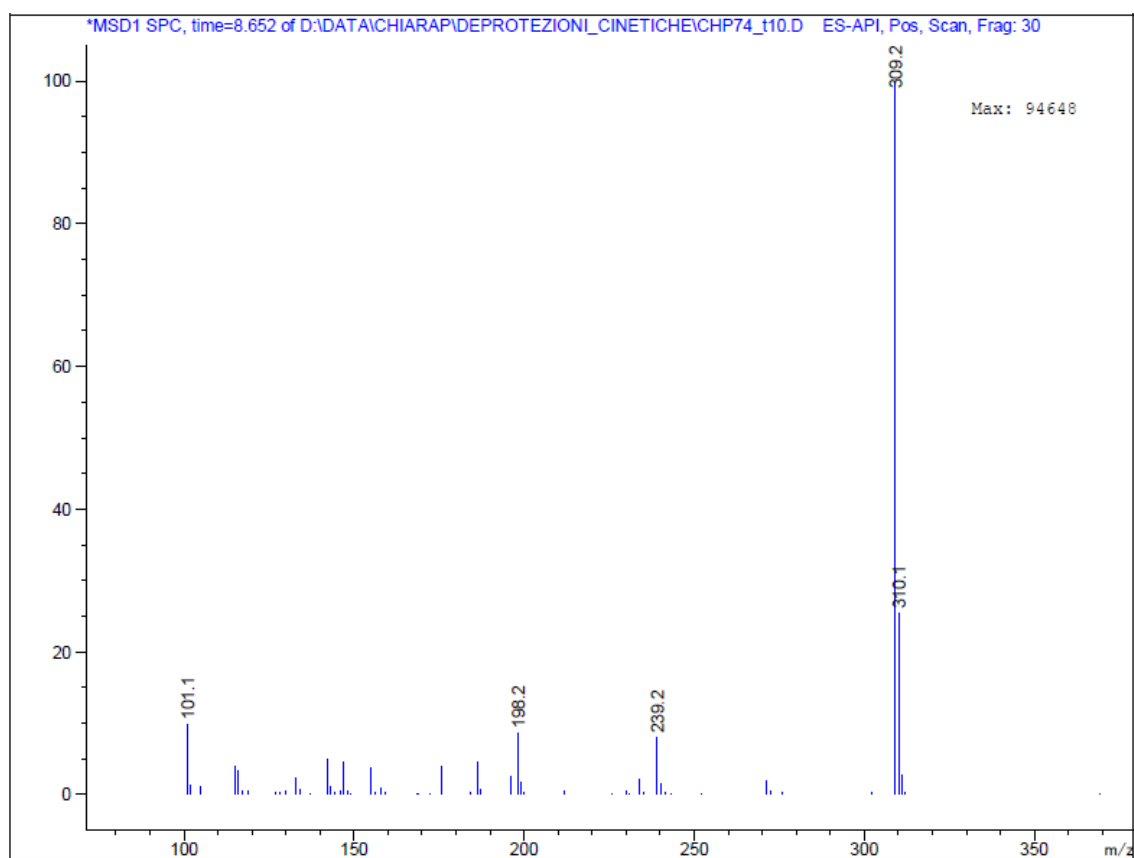

## Deprotection mechanism

**Figure S20.**  $^1\text{H}$  NMR spectrum (400 MHz,  $\text{DMF-d}_6$ ) after deprotection with 20% TBA in  $\text{DMF-d}_6$  of Fmoc-Gly-Trt-PS resin; the peak at 1.21 ppm corresponds to *t*Bu group of *t*BuNH<sub>2</sub>; the peaks at 6.45 ppm and aromatic signals between 7.5 and 8.5 ppm correspond to DBF

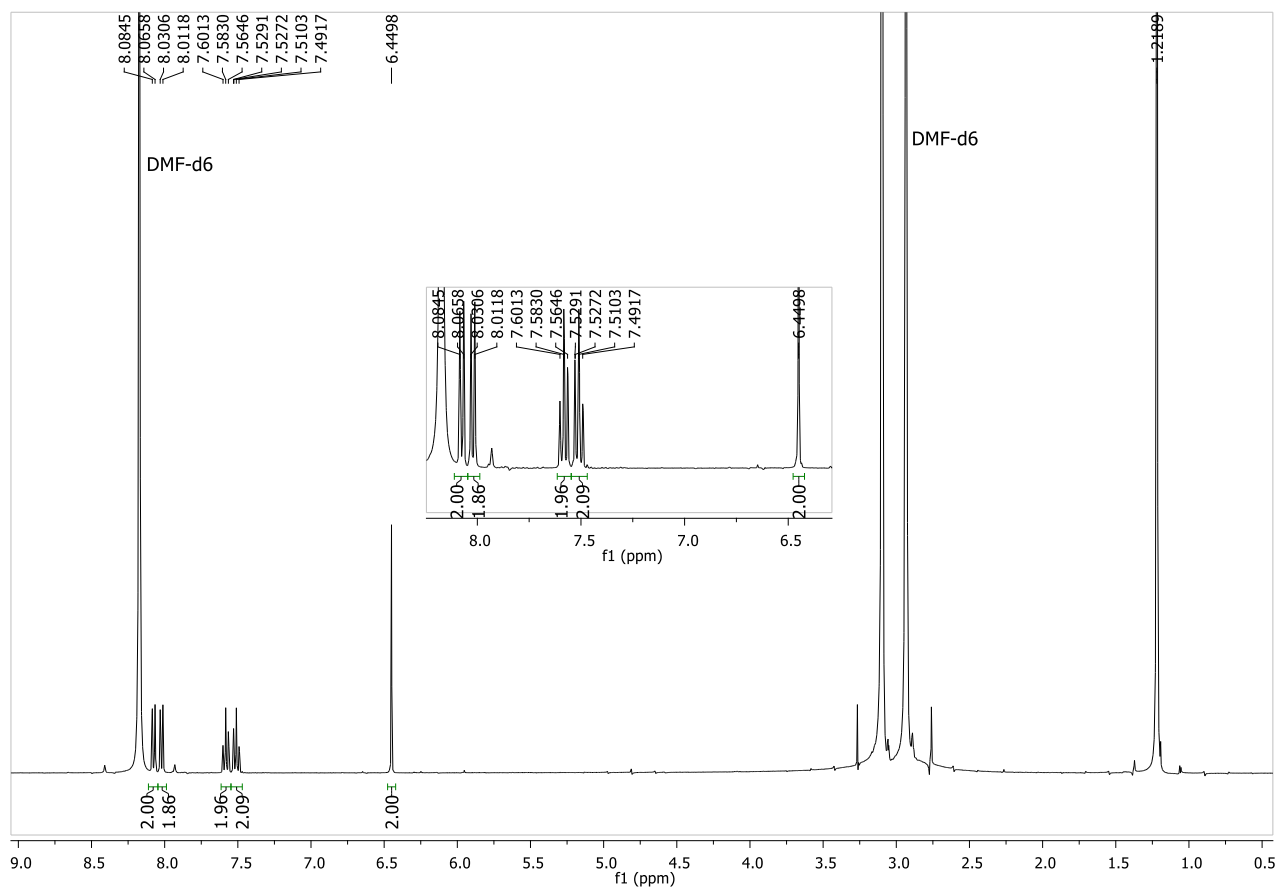

**Figure S21.**  $^1\text{H}$  NMR spectrum (400 MHz, DMF- $d_6$ ) after deprotection with 20% TMG in DMF- $d_6$  of Fmoc-Gly-Trt-PS resin; peak at 2.81 ppm corresponds to  $\text{CH}_3$  groups of TMG; peaks at 6.45 ppm and aromatic signals between 7.5 and 8.5 ppm correspond to DBF

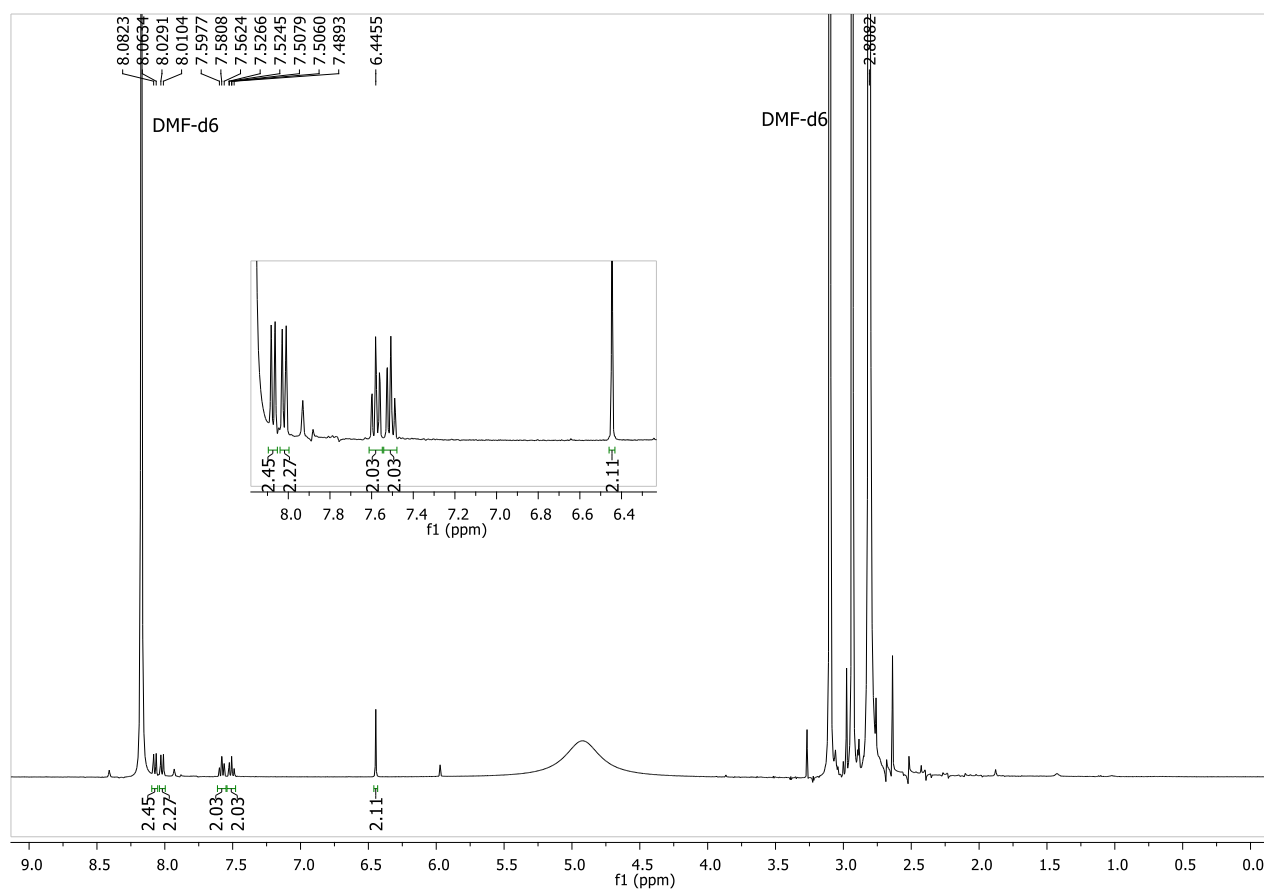

**Figure S22.**  $^1\text{H}$  NMR spectrum (400 MHz,  $\text{DMF-d}_6$ ) after deprotection with 20% DEAPA in  $\text{DMF-d}_6$  of Fmoc-Gly-Trt-PS resin; the peak indicated with \* corresponds to  $\text{H}_1$  signal of DBF-DEAPA adduct; the peak indicated with # corresponds to  $\text{H}_2$  signals of DBF; signals between 7.5 and 8.5 ppm are referred to a mixture of DBF and DBF-DEAPA aromatic protons. Calculated ratio of DBF/DBF-DEAPA adduct is 1/1.8.

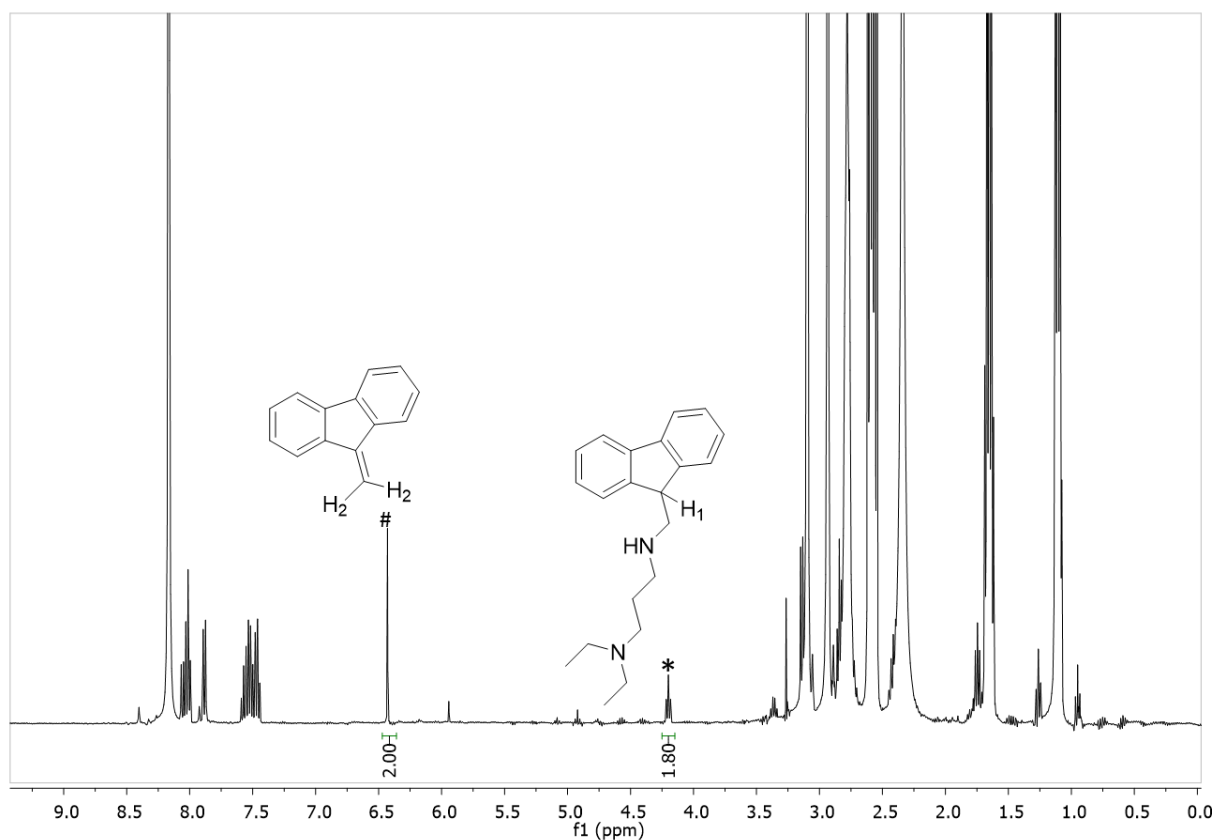

**Figure S23.**  $^1\text{H}$  NMR spectrum (400 MHz,  $\text{DMF-d}_6$ ) after deprotection with 20% piperidine in  $\text{DMF-d}_6$  of Fmoc-Gly-Trt-PS resin; the peak indicated with \* corresponds to  $\text{H}_1$  signal of DBF-piperidine adduct; the peak indicated with # corresponds to  $\text{H}_2$  signals of DBF; signals between 7.5 and 8.5 ppm are referred to a mixture of DBF and DBF-piperidine aromatic protons. Calculated ratio of DBF/DBF-piperidine adduct is 1/7.7.

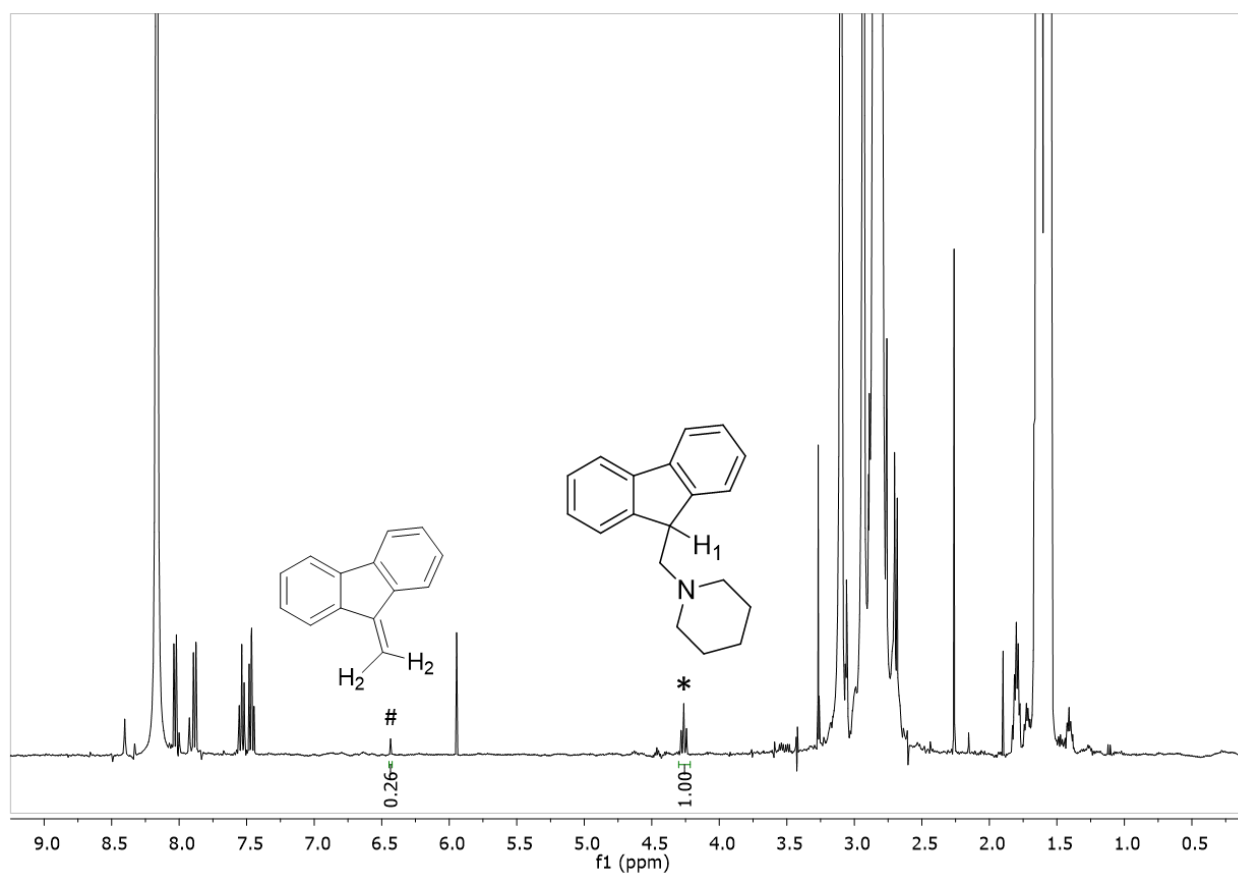

## Relative response factor (RRF) calculation

Relative Response Factor between dibenzofulvene (DBF) and DBF-base adduct (piperidine or DEAPA) was estimated calculating RRF between dibenzofulvene and 9-fluorenemethanol (9-FM) by HPLC-UV analysis. 9-fluorenemethanol was purchased from Merck and used as such; dibenzofulvene was obtained from deprotection of Fmoc-Phe-OH with *tert*-butylamine (30% in THF) followed by solvent evaporation (at reaction completion), acidic aqueous work-up, extraction with DCM and isolation of the organic fractions, which were purified by column chromatography (cyclohexane 100%). Purity of isolated dibenzofulvene was assessed by HPLC and  $^1\text{H}$  NMR as >95%; DBF was used immediately for RRF calculation.

**Figure S24.**  $^1\text{H}$  NMR spectrum of isolated dibenzofulvene

$^1\text{H}$  NMR (400 MHz,  $\text{CDCl}_3$ )  $\delta$  (ppm) 7.77 (d,  $J = 7.5$ , 2H), 7.73 (d,  $J = 7.5$ , 2H), 7.41 (t,  $J = 7.5$  Hz, 2H), 7.34 (t,  $J = 7.5$ , 2H), 6.11 (s, 2H).

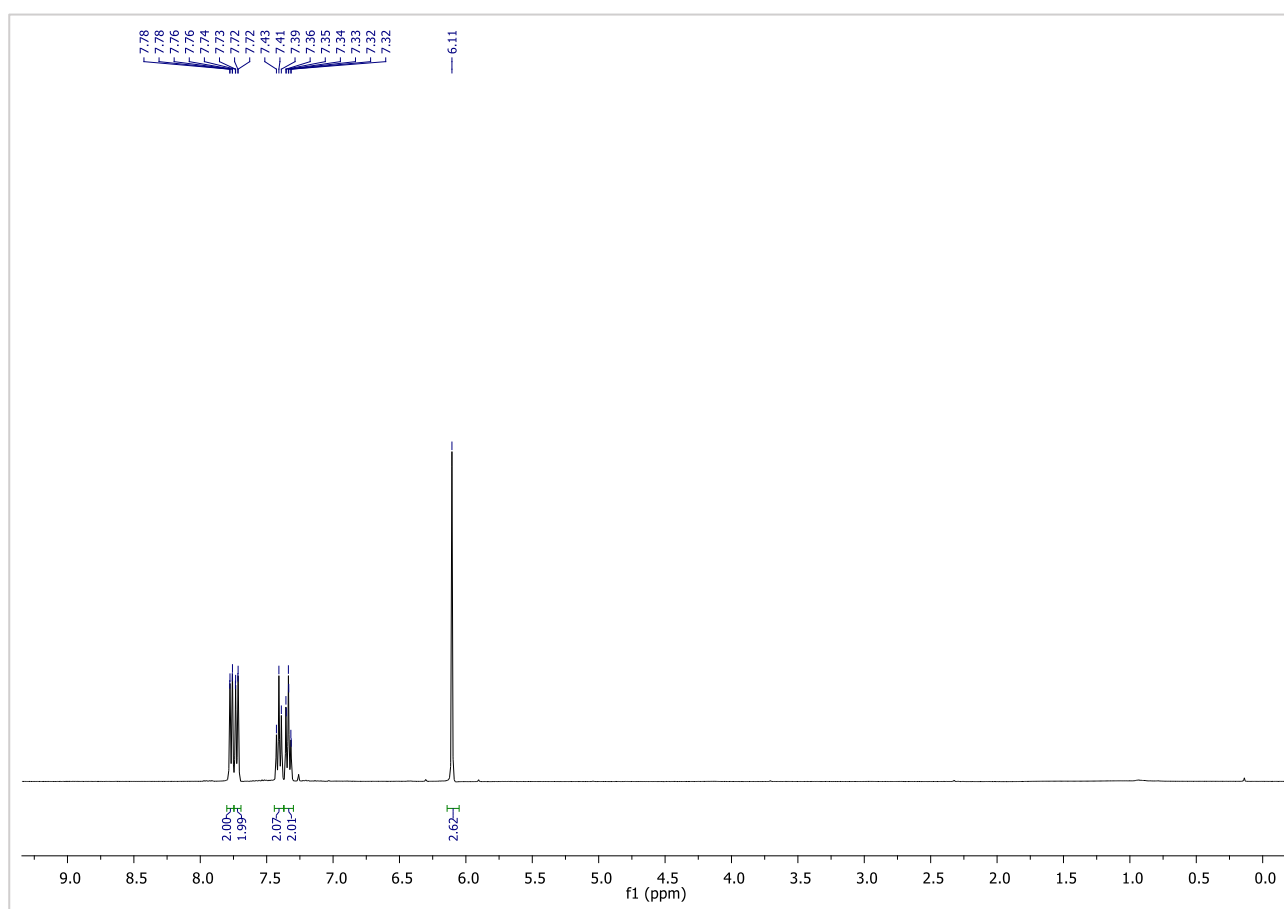

Relative Response Factor between 9-fluorenemethanol and dibenzofulvene was calculated considering the peak absorption areas of equimolar concentrations of both compounds at 220 nm (mean of analyses at three different concentrations).

A representative example of chromatograms of 9-FM and DBF at 0.0005 M concentration is reported below.

| Conc (M) | Area DBF (milliAu) | Area 9-FM (milliAu) | RRF <sub>(9-FM/DBF)</sub> | Mean value RRF |
|----------|--------------------|---------------------|---------------------------|----------------|
| 0.0005   | 11132.7            | 8833.5              | 0.79                      | 0.80           |
| 0.00025  | 5652.9             | 4533.7              | 0.80                      |                |
| 0.00005  | 2823.9             | 2240.3              | 0.79                      |                |

**Figure S25.** Chromatogram of 9-fluorenemethanol at 0.005 M concentration

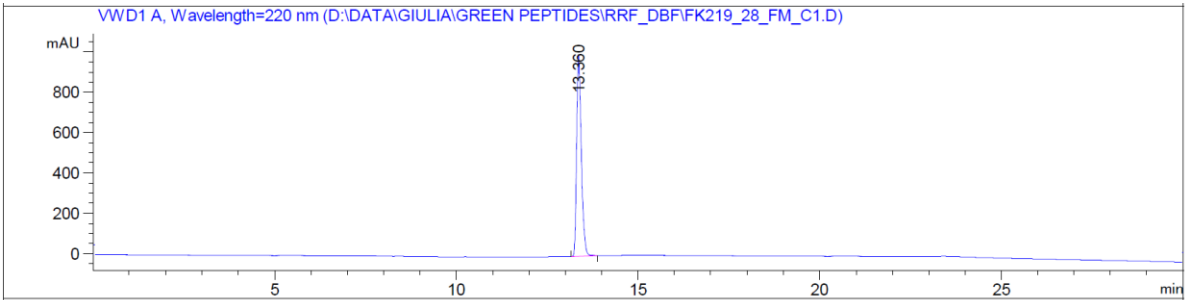

Signal 2: VWD1 A, Wavelength=220 nm

| Peak # | RetTime [min] | Type | Width [min] | Area [mAU*s] | Height [mAU] | Area %   |
|--------|---------------|------|-------------|--------------|--------------|----------|
| 1      | 13.360        | BB   | 0.1331      | 8833.49316   | 1000.05835   | 100.0000 |

**Figure S26.** Chromatogram of dibenzofulvene at 0.005 M concentration

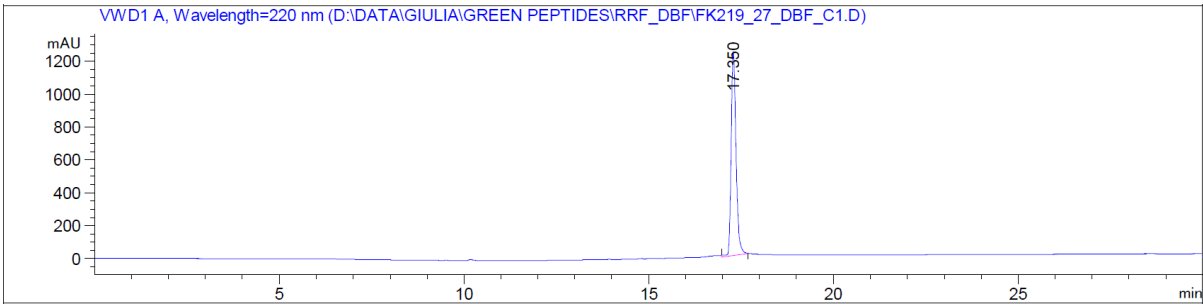

Signal 2: VWD1 A, Wavelength=220 nm

| Peak # | RetTime [min] | Type | Width [min] | Area [mAU*s] | Height [mAU] | Area %   |
|--------|---------------|------|-------------|--------------|--------------|----------|
| 1      | 17.350        | MM   | 0.1499      | 1.11327e4    | 1238.07373   | 100.0000 |

Totals : 1.11327e4 1238.07373

Relative Response Factor was used in the correction of peak areas for monitoring the conversion between DBF and DBF-base adduct (See Table 3 in the main text).

**Figure S27.** Chromatogram of Fmoc-Phe-OH deprotection in DMF with 20% piperidine at t=15 minutes

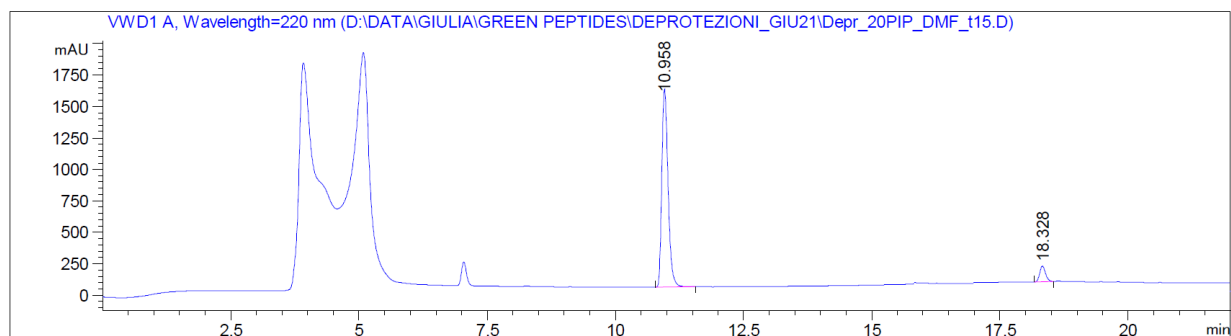

Signal 1: VWD1 A, Wavelength=220 nm

| Peak # | RetTime [min] | Type | Width [min] | Area [mAU*s] | Height [mAU] | Area %  |
|--------|---------------|------|-------------|--------------|--------------|---------|
| 1      | 10.958        | BB   | 0.1306      | 1.32837e4    | 1571.63379   | 94.9046 |
| 2      | 18.328        | MM   | 0.1104      | 713.19806    | 107.64330    | 5.0954  |

Totals : 1.39969e4 1679.27708

| Product               | Rt (min) | Area (%) | Area corrected with RRF (%) |
|-----------------------|----------|----------|-----------------------------|
| Piperidine-DBF adduct | 10.958   | 94.9     | 96                          |
| DBF                   | 18.328   | 5.1      | 4                           |

**Figure S28.** Chromatogram of Fmoc-Phe-OH deprotection in NBP with 20% piperidine at t=15 minutes

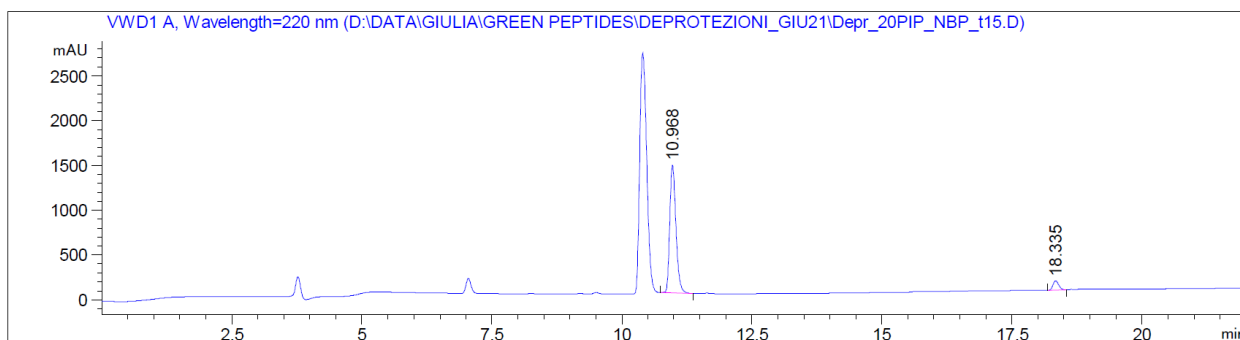

Signal 1: VWD1 A, Wavelength=220 nm

| Peak # | RetTime [min] | Type | Width [min] | Area [mAU*s] | Height [mAU] | Area %  |
|--------|---------------|------|-------------|--------------|--------------|---------|
| 1      | 10.968        | BB   | 0.1281      | 1.17705e4    | 1428.96436   | 95.2675 |
| 2      | 18.335        | MM   | 0.1071      | 584.70221    | 91.00556     | 4.7325  |

Totals : 1.23552e4 1519.96992

| Product               | Rt (min) | Area (%) | Area corrected with RRF (%) |
|-----------------------|----------|----------|-----------------------------|
| Piperidine-DBF adduct | 10.968   | 95.3     | 96                          |
| DBF                   | 18.335   | 4.7      | 4                           |

**Figure S29.** Chromatogram of Fmoc-Phe-OH deprotection in NOP with 20% piperidine at t=15 minutes

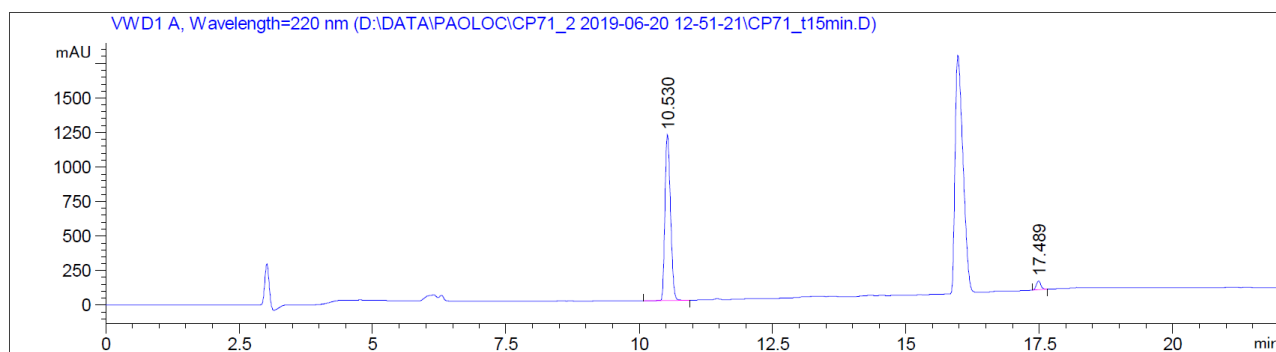

Signal 1: VWD1 A, Wavelength=220 nm

| Peak # | RetTime [min] | Type | Width [min] | Area [mAU*s] | Height [mAU] | Area %  |
|--------|---------------|------|-------------|--------------|--------------|---------|
| 1      | 10.530        | BB   | 0.1120      | 8661.23438   | 1202.82922   | 95.3461 |
| 2      | 17.489        | MM   | 0.1062      | 422.76453    | 66.37790     | 4.6539  |

Totals : 9083.99890 1269.20712

| Product               | Rt (min) | Area (%) | Area corrected with RRF (%) |
|-----------------------|----------|----------|-----------------------------|
| Piperidine-DBF adduct | 10.530   | 95.3     | 96                          |
| DBF                   | 17.489   | 4.7      | 4                           |

**Figure S30.** Chromatogram of Fmoc-Phe-OH deprotection in NOP with 10% piperidine at t=15 minutes

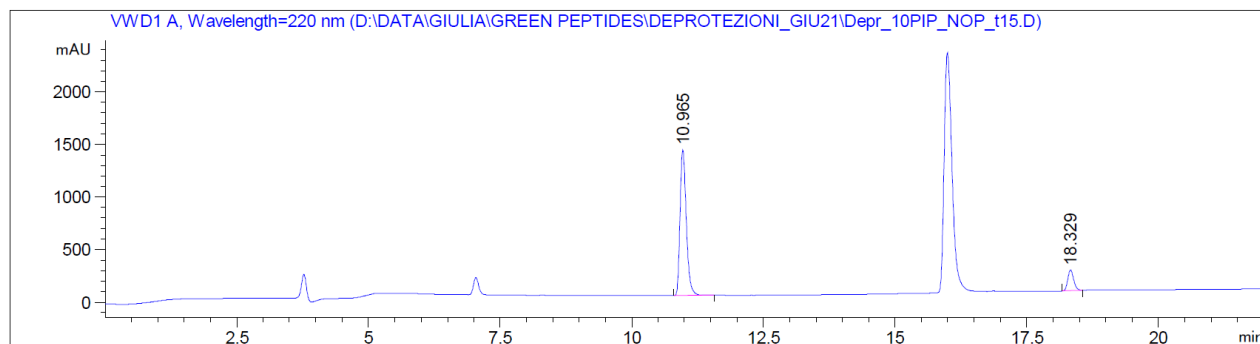

Signal 1: VWD1 A, Wavelength=220 nm

| Peak # | RetTime [min] | Type | Width [min] | Area [mAU*s] | Height [mAU] | Area %  |
|--------|---------------|------|-------------|--------------|--------------|---------|
| 1      | 10.965        | BB   | 0.1256      | 1.13672e4    | 1387.41321   | 88.0628 |
| 2      | 18.329        | BB   | 0.1209      | 1540.86584   | 197.72040    | 11.9372 |

Totals : 1.29081e4 1585.13361

| Product               | Rt (min) | Area (%) | Area corrected with RRF (%) |
|-----------------------|----------|----------|-----------------------------|
| Piperidine-DBF adduct | 10.965   | 88.1     | 90                          |
| DBF                   | 18.329   | 11.9     | 10                          |

**Figure S31.** Chromatogram of Fmoc-Phe-OH deprotection in DMF with 10% DEAPA at t=15 minutes

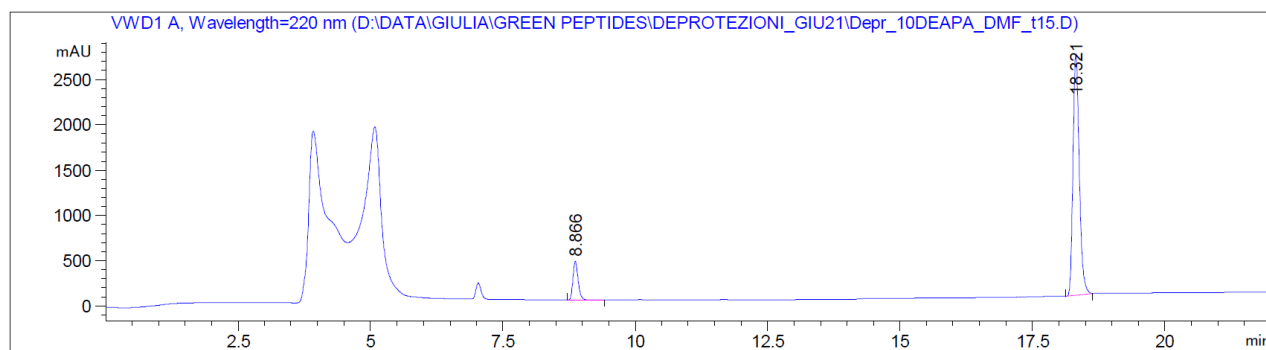

Signal 1: VWD1 A, Wavelength=220 nm

| Peak # | RetTime [min] | Type | Width [min] | Area [mAU*s] | Height [mAU] | Area %  |
|--------|---------------|------|-------------|--------------|--------------|---------|
| 1      | 8.866         | BB   | 0.1036      | 2916.41187   | 427.69070    | 11.7024 |
| 2      | 18.321        | BB   | 0.1286      | 2.20051e4    | 2658.70679   | 88.2976 |

Totals : 2.49215e4 3086.39749

| Product          | Rt (min) | Area (%) | Area corrected with RRF (%) |
|------------------|----------|----------|-----------------------------|
| DEAPA-DBF adduct | 8.866    | 11.7     | 14                          |
| DBF              | 18.321   | 88.3     | 86                          |

**Figure S32.** Chromatogram of Fmoc-Phe-OH deprotection in NBP with 10% DEAPA at t=15 minutes

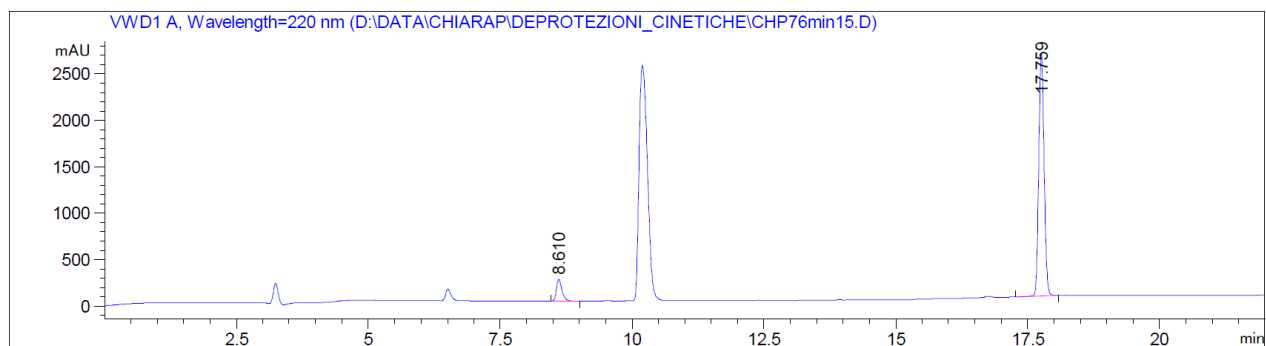

Signal 1: VWD1 A, Wavelength=220 nm

| Peak # | RetTime [min] | Type | Width [min] | Area [mAU*s] | Height [mAU] | Area %  |
|--------|---------------|------|-------------|--------------|--------------|---------|
| 1      | 8.610         | BB   | 0.1106      | 1699.32837   | 234.23108    | 8.4328  |
| 2      | 17.759        | BB   | 0.1103      | 1.84520e4    | 2616.63135   | 91.5672 |

Totals : 2.01513e4 2850.86243

| Product          | Rt (min) | Area (%) | Area corrected with RRF (%) |
|------------------|----------|----------|-----------------------------|
| DEAPA-DBF adduct | 8.810    | 8.4      | 10                          |
| DBF              | 17.759   | 91.6     | 90                          |

**Figure S33.** Chromatogram of Fmoc-Phe-OH deprotection in NOP with 10% DEAPA at t=15 minutes

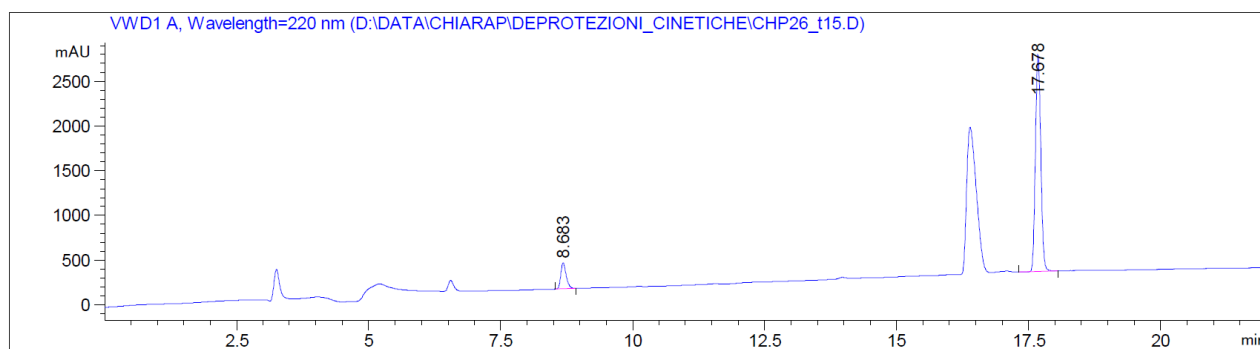

Signal 1: VWD1 A, Wavelength=220 nm

| Peak # | RetTime [min] | Type | Width [min] | Area [mAU*s] | Height [mAU] | Area %  |
|--------|---------------|------|-------------|--------------|--------------|---------|
| 1      | 8.683         | BB   | 0.1080      | 2046.08594   | 291.06232    | 10.6296 |
| 2      | 17.678        | BB   | 0.1108      | 1.72029e4    | 2423.63745   | 89.3704 |

Totals : 1.92490e4 2714.69977

| Product          | Rt (min) | Area (%) | Area corrected with RRF (%) |
|------------------|----------|----------|-----------------------------|
| DEAPA-DBF adduct | 8.683    | 10.6     | 13                          |
| DBF              | 17.678   | 89.4     | 87                          |

**Figure S34.** Chromatogram of Fmoc-Phe-OH deprotection in NOP with 20% DEAPA at t=15 minutes

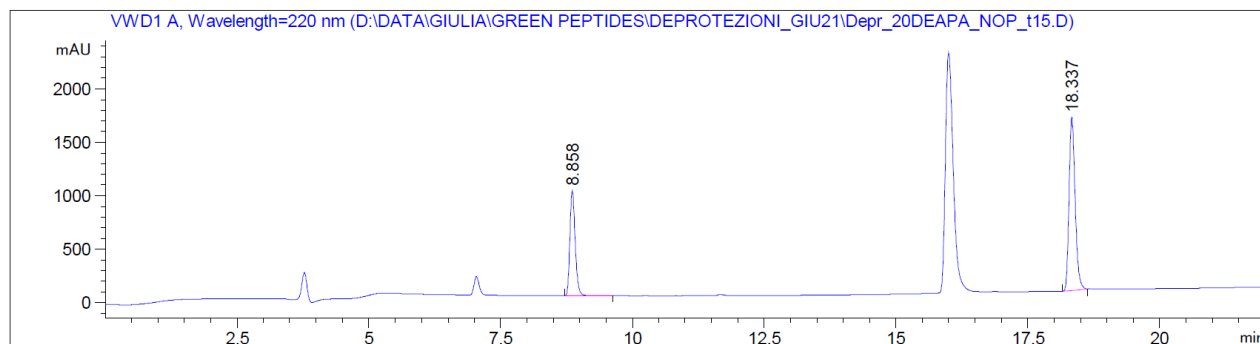

Signal 1: VWD1 A, Wavelength=220 nm

| Peak # | RetTime [min] | Type | Width [min] | Area [mAU*s] | Height [mAU] | Area %  |
|--------|---------------|------|-------------|--------------|--------------|---------|
| 1      | 8.858         | BB   | 0.1074      | 6852.90625   | 982.75287    | 34.5512 |
| 2      | 18.337        | BB   | 0.1235      | 1.29812e4    | 1619.73462   | 65.4488 |

Totals : 1.98341e4 2602.48749

| Product          | Rt (min) | Area (%) | Area corrected with RRF (%) |
|------------------|----------|----------|-----------------------------|
| DEAPA-DBF adduct | 8.858    | 34.6     | 40                          |
| DBF              | 18.337   | 65.4     | 60                          |

**Table S1.** Formation of base-DBF adduct in the studied solvents with deprotection times at 6 minutes

| Entry | Base (%)        | Solvent | Base-DBF adduct:DBF <sup>a</sup> |
|-------|-----------------|---------|----------------------------------|
| 1     | Piperidine (5)  | DMF     | 29:71                            |
| 2     | Piperidine (10) | DMF     | 89:11                            |
| 3     | Piperidine (20) | DMF     | 95:5                             |
| 4     | Piperidine (20) | NBP     | 95:5                             |
| 5     | Piperidine (20) | NOP     | 78:22                            |
| 6     | DEAPA (10)      | DMF     | 5:95                             |
| 7     | DEAPA (20)      | DMF     | 23:77                            |
| 8     | DEAPA (30)      | DMF     | 43:57                            |
| 9     | DEAPA (10)      | NBP     | 5:95                             |
| 10    | DEAPA (20)      | NBP     | 23:77                            |
| 11    | DEAPA (30)      | NBP     | 43:57                            |
| 12    | DEAPA (10)      | NOP     | 5:95                             |
| 13    | DEAPA (20)      | NOP     | 22:78                            |
| 14    | DEAPA (30)      | NOP     | 38:62                            |

<sup>a</sup> Calculated on the basis on HPLC signal integration of crude samples after t=6 min deprotection after correction with RRF=0.8 (see ESI)

## Racemization tests

**Figure S35.** Chromatogram of H-Phe-L-Cys-Gly-OH, manual SPPS in DMF in standard conditions for reference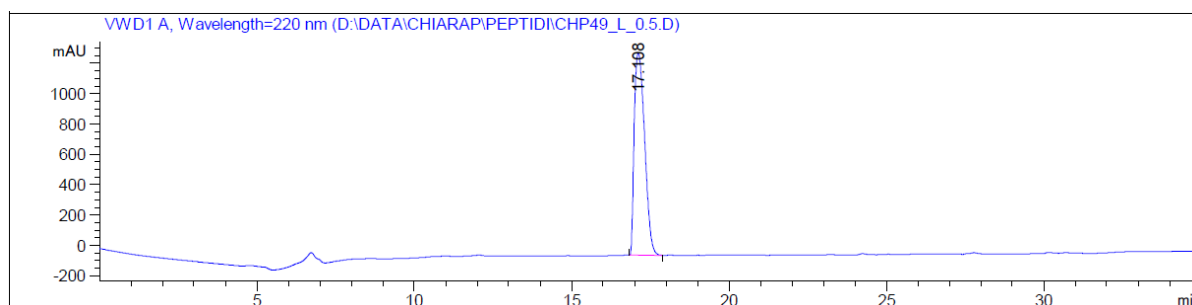**Figure S36.** Chromatogram of H-Phe-D-Cys-Gly-OH, manual SPPS in DMF in standard conditions for reference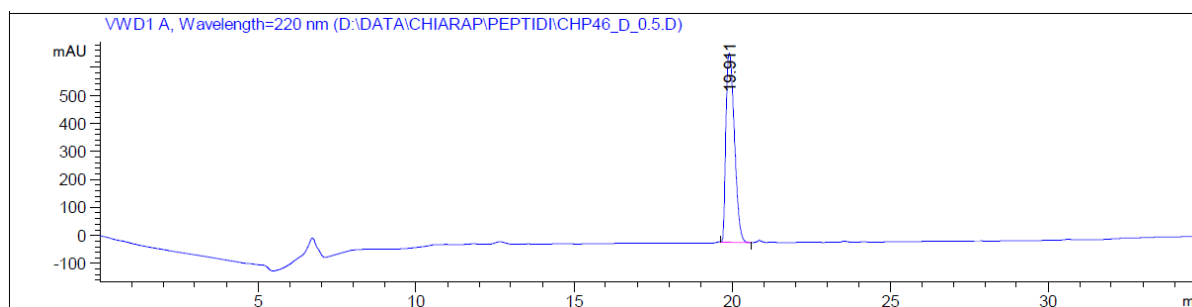

**Figure S37.** Chromatogram of a mixture of H-Phe-L-Cys-Gly-OH and H-Phe-D-Cys-Gly-OH

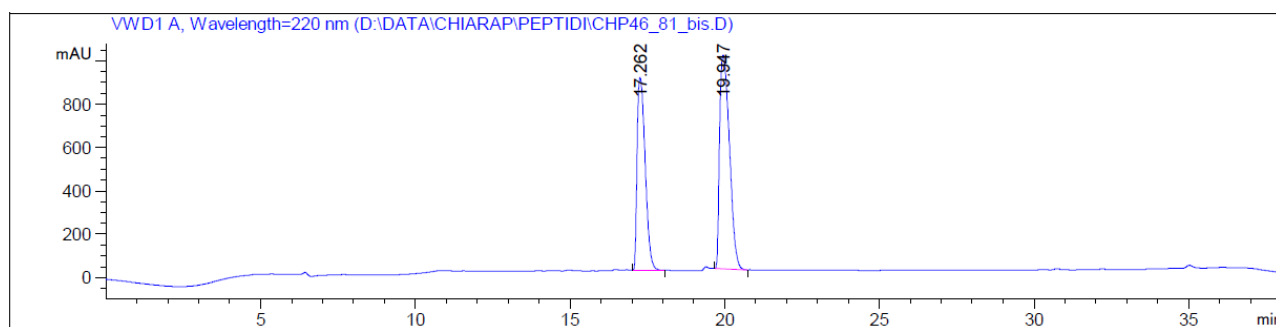

**Figure S38.** Overview of racemization tests with the tested bases in NOP during manual SPPS of H-Phe-L-Cys-Gly-OH

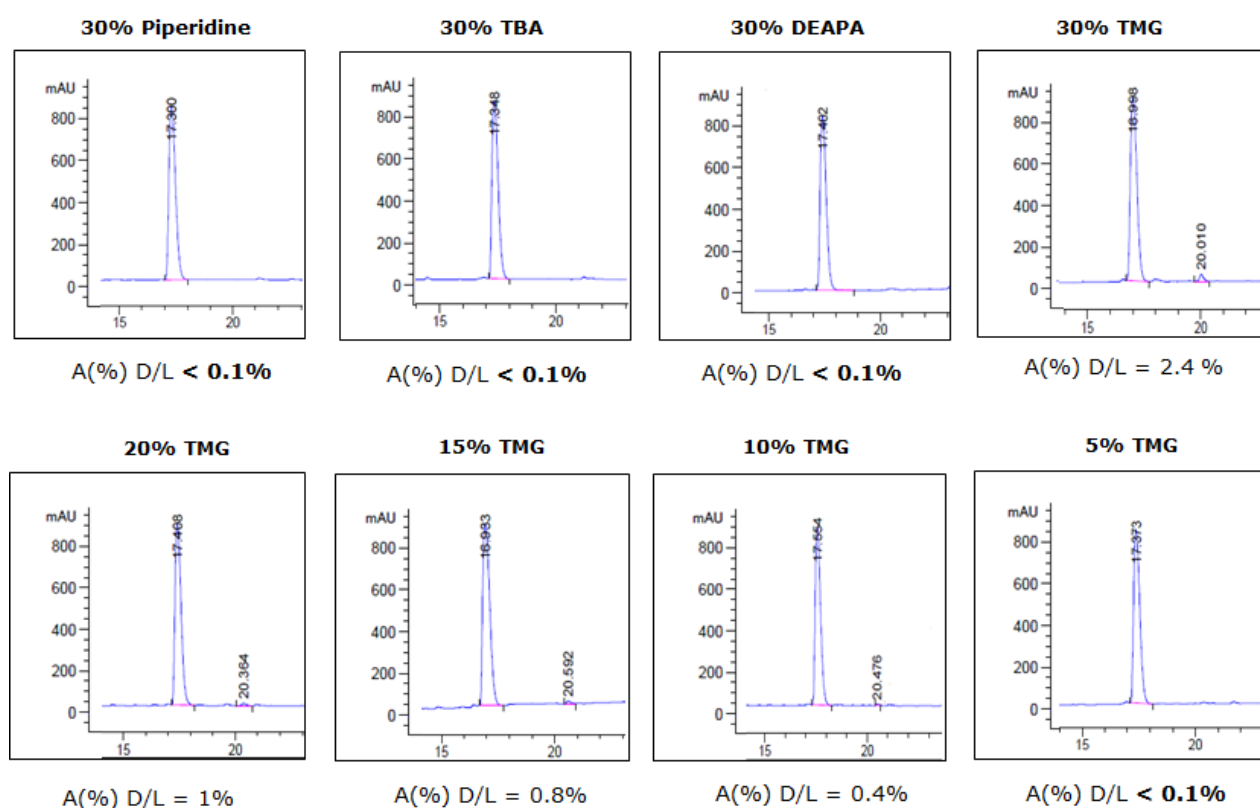

**Figure S39.** Chromatogram of H-Phe-Cys-Gly-OH, manual SPPS in **NOP** with **30% piperidine** as deprotection solution (60 minutes deprotection time)

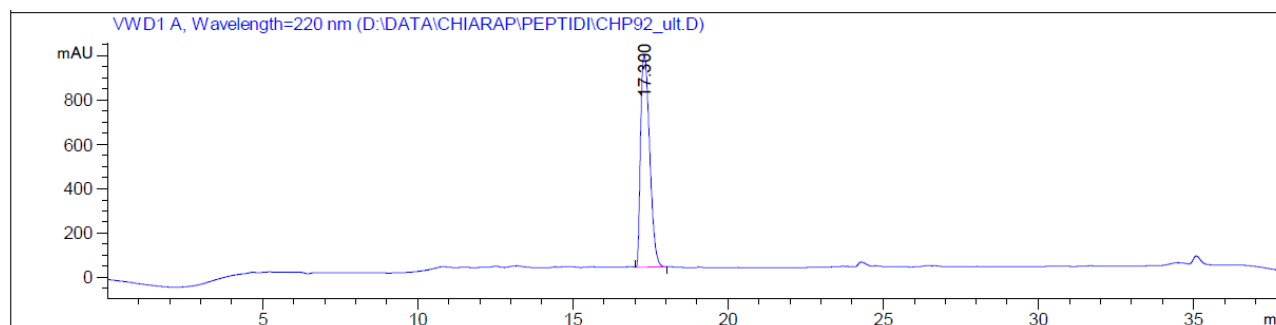

**Figure S40.** Chromatogram of H-Phe-Cys-Gly-OH, manual SPPS in **NOP** with **30% TBA** as deprotection solution (60 minutes deprotection time)

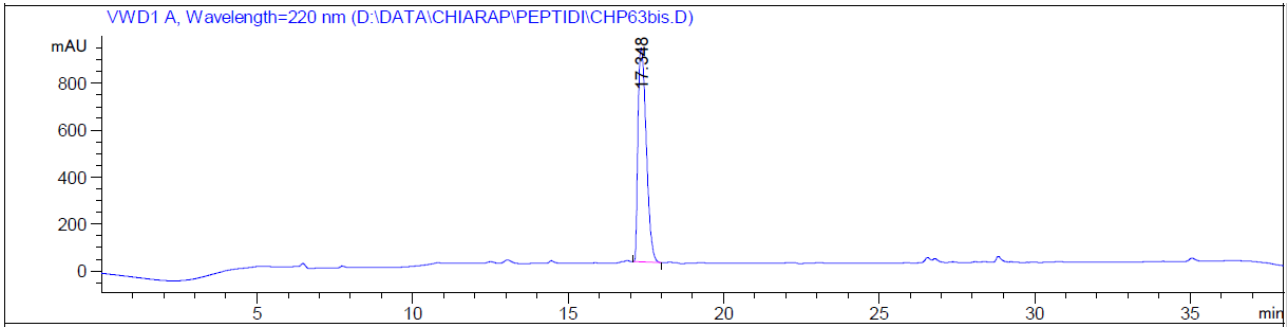

**Figure S41.** Chromatogram of H-Phe-Cys-Gly-OH, manual SPPS in **NOP** with **30% TMG** as deprotection solution (60 minutes deprotection time)

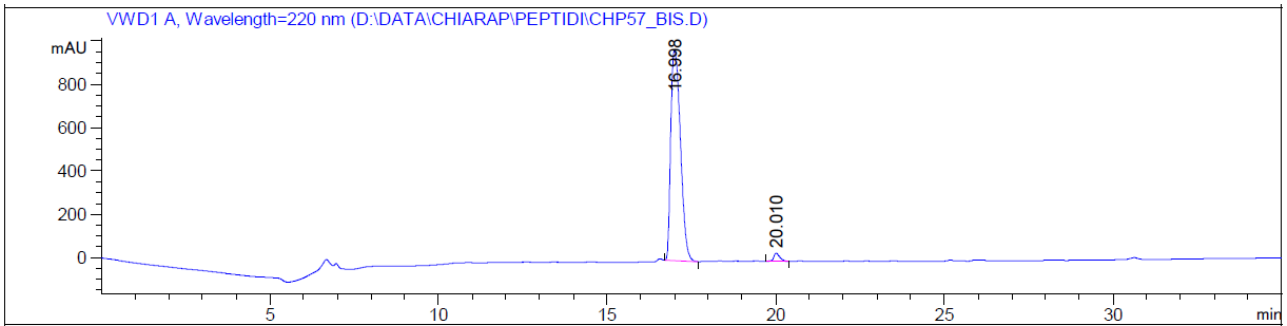

Signal 2: VWD1 A, Wavelength=220 nm

| Peak # | RetTime [min] | Type | Width [min] | Area [mAU*s] | Height [mAU] | Area %  |
|--------|---------------|------|-------------|--------------|--------------|---------|
| 1      | 16.998        | BB   | 0.3229      | 1.94418e4    | 973.92926    | 97.6394 |
| 2      | 20.010        | BB   | 0.1805      | 470.04501    | 38.48532     | 2.3606  |

Totals : 1.99118e4 1012.41458

| Product            | Rt (min) | Area (%) |
|--------------------|----------|----------|
| H-Phe-L-Cys-Gly-OH | 16.998   | 97.6     |
| H-Phe-D-Cys-Gly-OH | 20.010   | 2.4      |

**Figure S42.** Chromatogram of H-Phe-Cys-Gly-OH, manual SPPS in **NOP** with **20% TMG** as deprotection solution (60 minutes deprotection time)

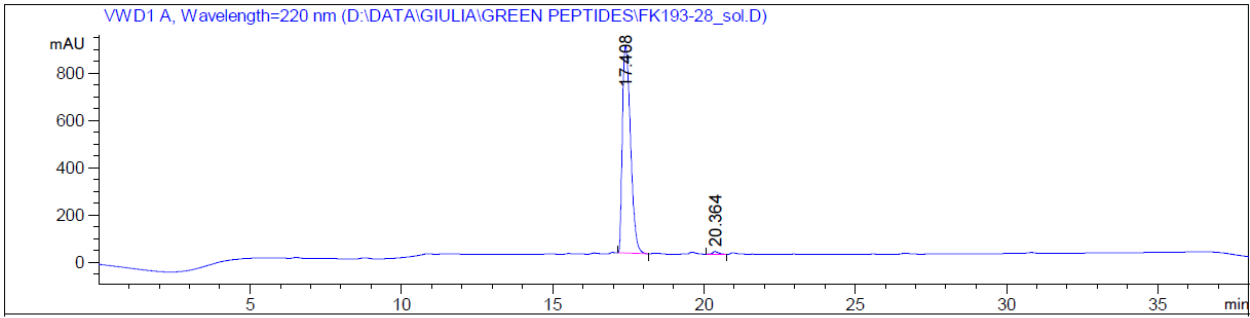

Signal 1: VWD1 A, Wavelength=220 nm

| Peak # | RetTime [min] | Type | Width [min] | Area [mAU*s] | Height [mAU] | Area %  |
|--------|---------------|------|-------------|--------------|--------------|---------|
| 1      | 17.408        | BB   | 0.3035      | 1.65004e4    | 876.89343    | 99.0386 |
| 2      | 20.364        | BB   | 0.1971      | 160.17575    | 11.74310     | 0.9614  |

Totals : 1.66606e4 888.63653

| Product            | Rt (min) | Area (%) |
|--------------------|----------|----------|
| H-Phe-L-Cys-Gly-OH | 17.408   | 99.0     |
| H-Phe-D-Cys-Gly-OH | 20.364   | 1.0      |

**Figure S43.** Chromatogram of H-Phe-Cys-Gly-OH, manual SPPS in **NOP** with **15% TMG** as deprotection solution (60 minutes deprotection time)

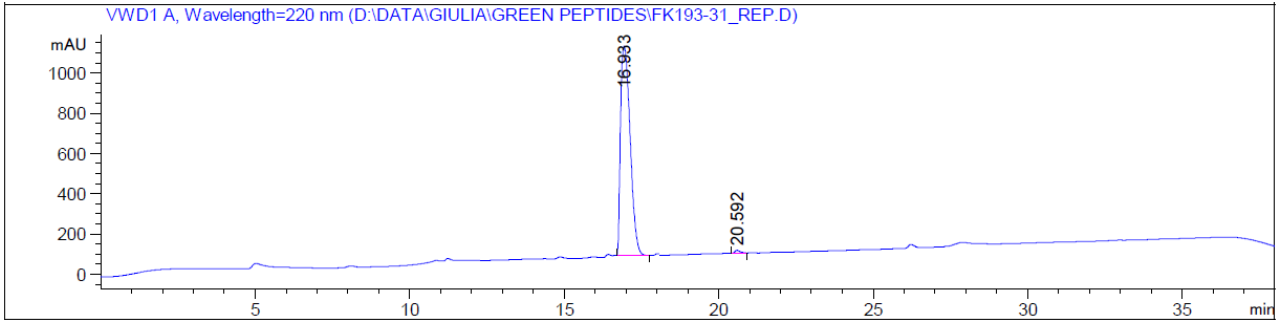

Signal 2: VWD1 A, Wavelength=220 nm

| Peak # | RetTime [min] | Type | Width [min] | Area [mAU*s] | Height [mAU] | Area %  |
|--------|---------------|------|-------------|--------------|--------------|---------|
| 1      | 16.933        | BB   | 0.3531      | 2.24273e4    | 1041.89746   | 99.2197 |
| 2      | 20.592        | BB   | 0.1711      | 176.38608    | 15.22942     | 0.7803  |

Totals : 2.26037e4 1057.12688

| Product            | Rt (min) | Area (%) |
|--------------------|----------|----------|
| H-Phe-L-Cys-Gly-OH | 16.933   | 99.2     |
| H-Phe-D-Cys-Gly-OH | 20.592   | 0.8      |

**Figure S44.** Chromatogram of H-Phe-Cys-Gly-OH, manual SPPS in **NOP** with **10% TMG** as deprotection solution (60 minutes deprotection time)

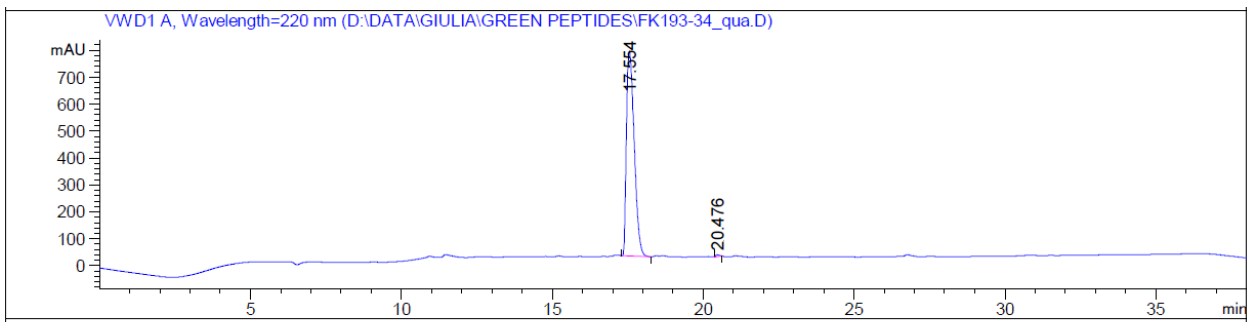

Signal 2: VWD1 A, Wavelength=220 nm

| Peak # | RetTime [min] | Type | Width [min] | Area [mAU*s] | Height [mAU] | Area %  |
|--------|---------------|------|-------------|--------------|--------------|---------|
| 1      | 17.554        | BB   | 0.2851      | 1.36381e4    | 760.82928    | 99.5663 |
| 2      | 20.476        | MM   | 0.1449      | 59.40553     | 6.83167      | 0.4337  |

Totals : 1.36975e4 767.66095

| Product            | Rt (min) | Area (%) |
|--------------------|----------|----------|
| H-Phe-L-Cys-Gly-OH | 17.554   | 99.6     |
| H-Phe-D-Cys-Gly-OH | 20.476   | 0.4      |

**Figure S45.** Chromatogram of H-Phe-Cys-Gly-OH, manual SPPS in **NOP** with **5% TMG** as deprotection solution (60 minutes deprotection time)

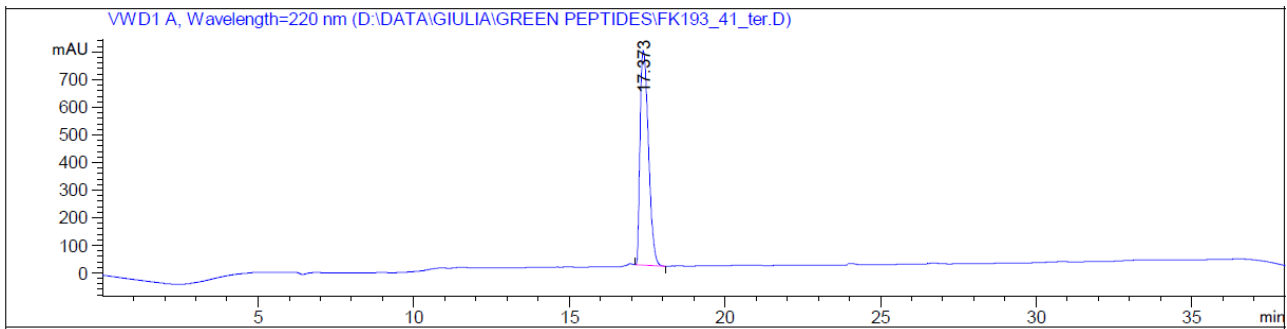

**Figure S46.** Chromatogram of H-Phe-Cys-Gly-OH, manual SPPS in **NOP** with **30% DEAPA** as deprotection solution (60 minutes deprotection time)

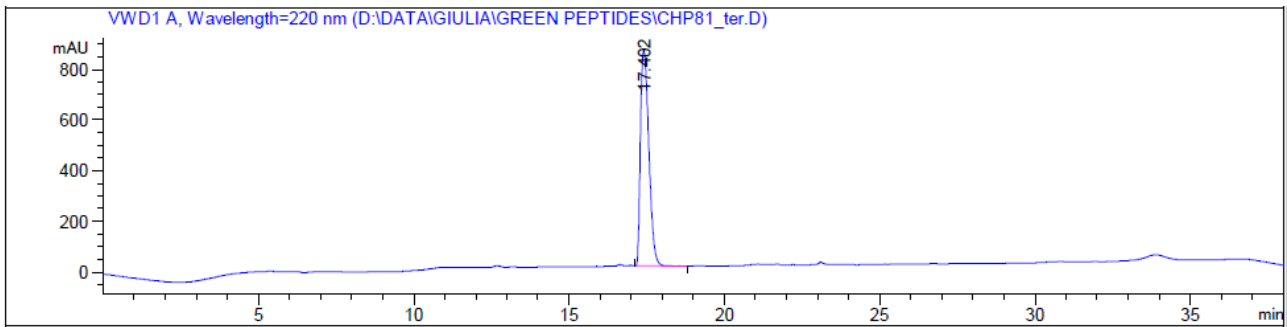

**Figure S47.** Chromatogram of H-Phe-Cys-Gly-OH, manual SPPS in **NOP/DMC 8/2** with **30% piperidine** as deprotection solution (60 minutes deprotection time)

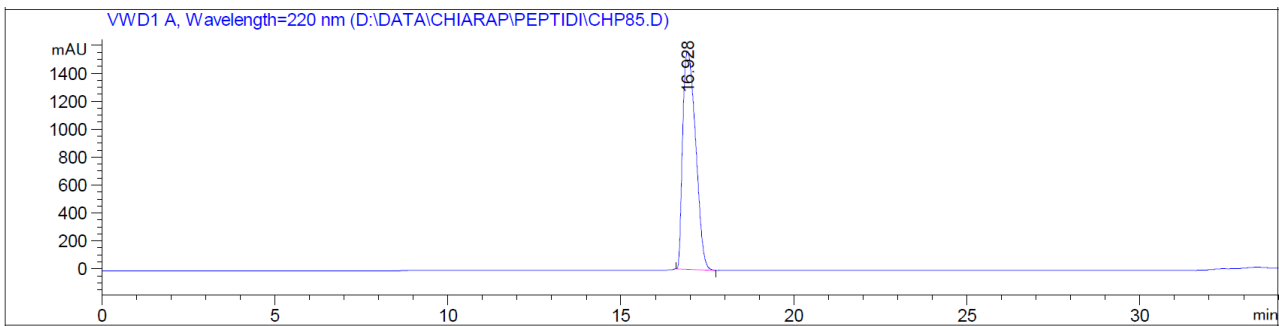

**Figure S48.** Chromatogram of H-Phe-Cys-Gly-OH, manual SPPS in **NOP/DMC 8/2** with **30% TBA** as deprotection solution (60 minutes deprotection time)

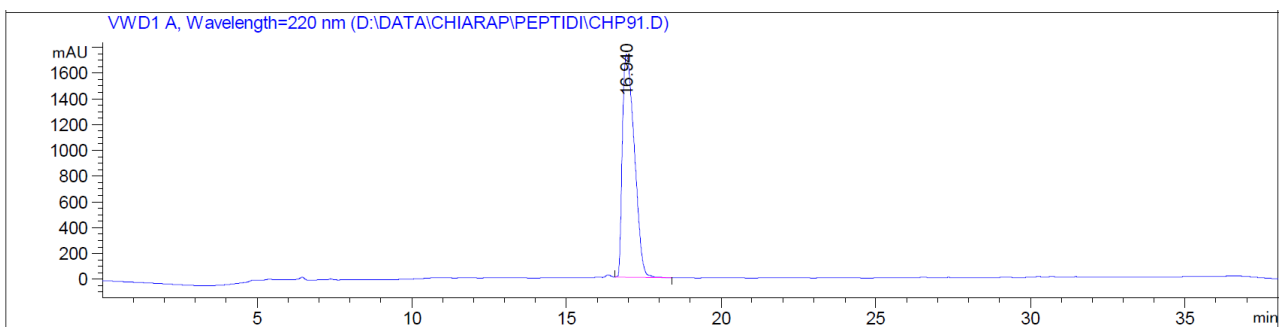

**Figure S49.** Chromatogram of H-Phe-Cys-Gly-OH, manual SPPS in **NOP/DMC 8/2** with **30% TMG** as deprotection solution (60 minutes deprotection time)

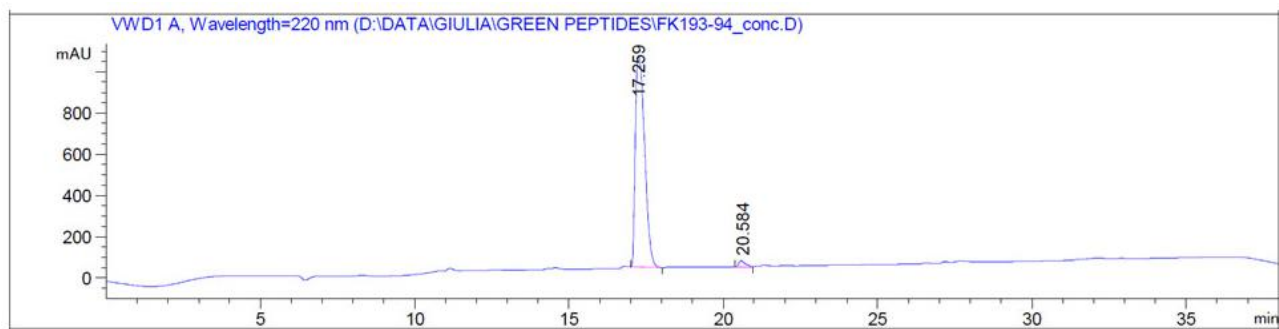

Signal 2: VWD1 A, Wavelength=220 nm

| Peak # | RetTime [min] | Type | Width [min] | Area [mAU*s] | Height [mAU] | Area %  |
|--------|---------------|------|-------------|--------------|--------------|---------|
| 1      | 17.259        | BB   | 0.3397      | 2.09280e4    | 1024.64478   | 97.7927 |
| 2      | 20.584        | BB   | 0.1956      | 472.36931    | 43.08929     | 2.2073  |

Totals : 2.14003e4 1067.73407

| Product            | Rt (min) | Area (%) |
|--------------------|----------|----------|
| H-Phe-L-Cys-Gly-OH | 17.259   | 97.8     |
| H-Phe-D-Cys-Gly-OH | 20.584   | 2.2      |

**Figure S50.** Chromatogram of H-Phe-Cys-Gly-OH, manual SPPS in **NOP/DMC 8/2** with **30% DEAPA** as deprotection solution (60 minutes deprotection time)

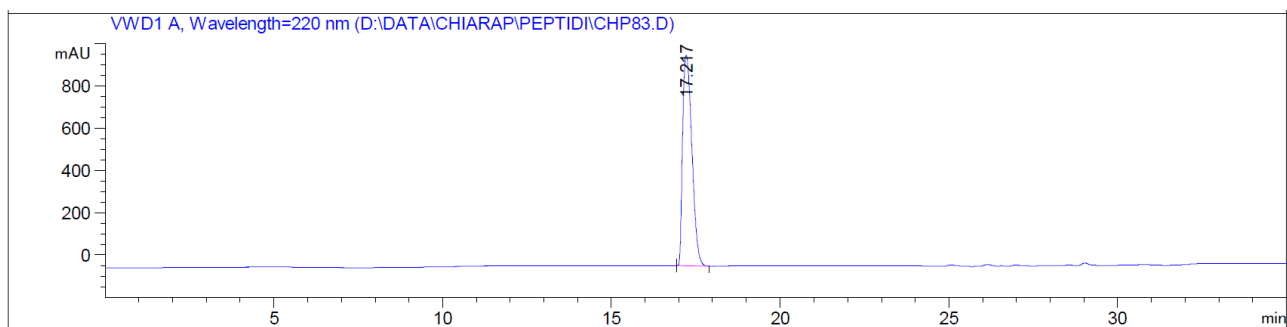

**Figure S51.** Chromatogram of H-Phe-Cys-Gly-OH, manual SPPS in **DMF** with **30% piperidine** as deprotection solution (60 minutes deprotection time)

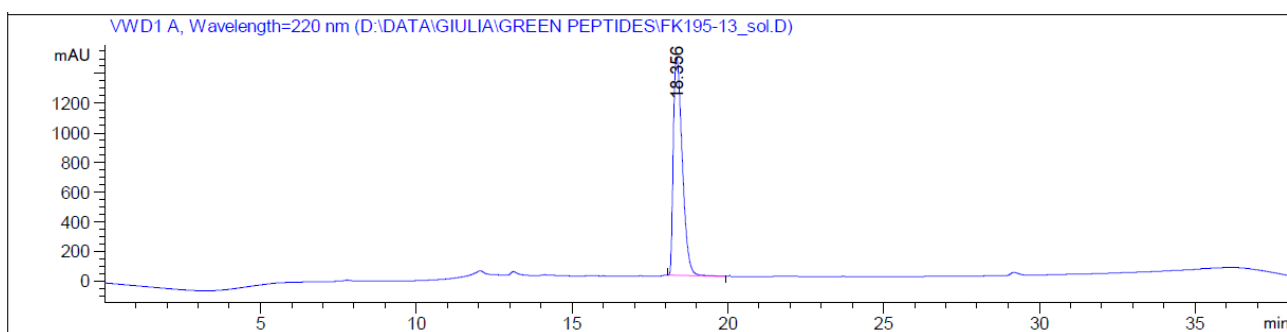

**Figure S52.** Chromatogram of H-Phe-Cys-Gly-OH, manual SPPS in **DMF** with **30% DEAPA** as deprotection solution (60 minutes deprotection time)

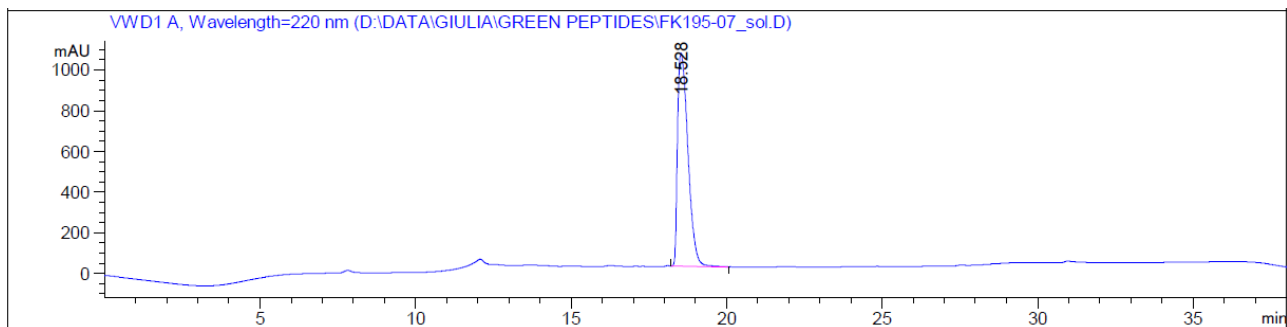

# Aspartimide formation

**Figure S53.** Chromatogram of H-Ala-Lys-Asp-Gly-Tyr-Ile-OH, manual SPPS with standard conditions for reference compound

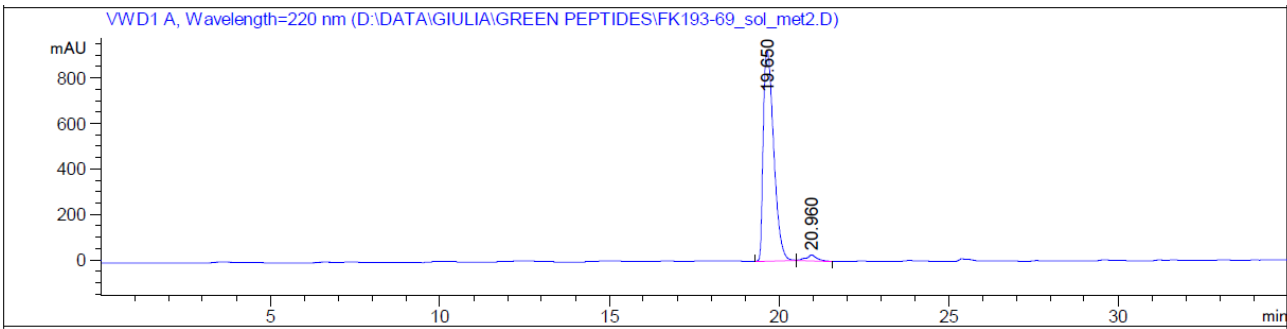

Signal 2: VWD1 A, Wavelength=220 nm

| Peak # | RetTime [min] | Type | Width [min] | Area [mAU*s] | Height [mAU] | Area %  |
|--------|---------------|------|-------------|--------------|--------------|---------|
| 1      | 19.650        | BB   | 0.3342      | 1.96926e4    | 925.58374    | 97.4196 |
| 2      | 20.960        | BB   | 0.2812      | 521.60944    | 25.65905     | 2.5804  |

Totals : 2.02142e4 951.24279

| Product        | Rt (min) | Area (%) |
|----------------|----------|----------|
| Hexapeptide I  | 19.650   | 97.4     |
| Aspartimide II | 20.960   | 2.6      |

**Figure S54.** Chromatogram of H-Ala-Lys-Asp-Gly-Tyr-Ile-OH after resin-bound peptide stress test with 20% piperidine in DMF, 4 h at RT

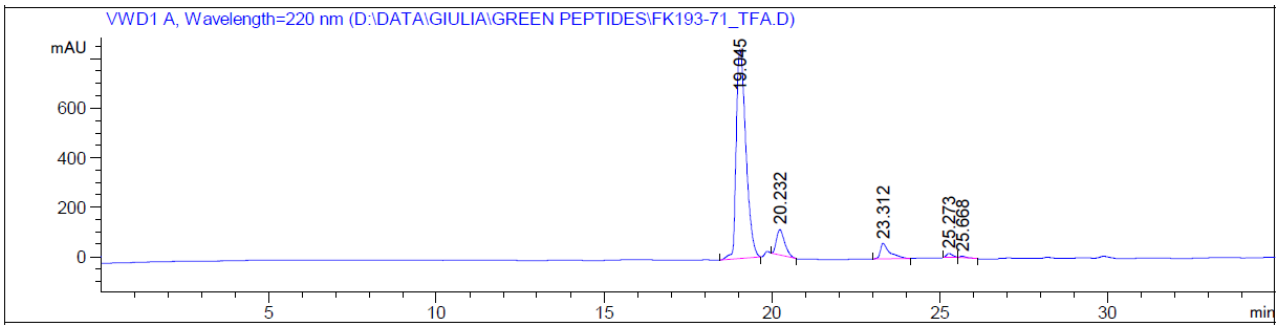

Signal 2: VWD1 A, Wavelength=220 nm

| Peak # | RetTime [min] | Type | Width [min] | Area [mAU*s] | Height [mAU] | Area %  |
|--------|---------------|------|-------------|--------------|--------------|---------|
| 1      | 19.045        | BB   | 0.3162      | 1.69608e4    | 844.82214    | 83.9320 |
| 2      | 20.232        | BB   | 0.2624      | 1764.02014   | 102.71278    | 8.7294  |
| 3      | 23.312        | BB   | 0.2735      | 1230.24805   | 62.52800     | 6.0880  |
| 4      | 25.273        | BB   | 0.1836      | 185.95247    | 15.53874     | 0.9202  |
| 5      | 25.668        | BB   | 0.1739      | 66.76701     | 5.73191      | 0.3304  |

Totals : 2.02078e4 1031.33357

| Product         | Rt (min) | Area (%) |
|-----------------|----------|----------|
| Hexapeptide I   | 19.045   | 83.9     |
| Aspartimide II  | 20.232   | 8.7      |
| Piperidides III | 23.312   | 6.1      |
|                 | 25.273   | 0.9      |
|                 | 25.668   | 0.3      |

**Figure S55.** Chromatogram of H-Ala-Lys-Asp-Gly-Tyr-Ile-OH after resin-bound peptide stress test with **20% piperidine in DMF, 4 h at 40°C**

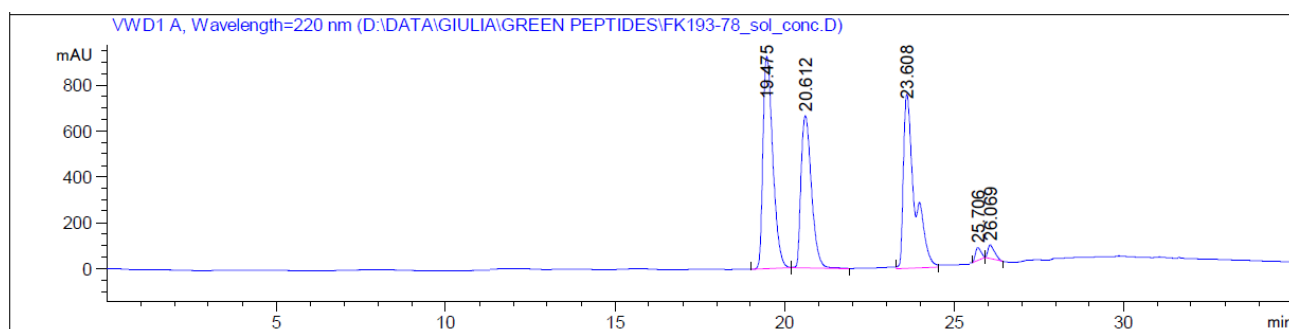

Signal 2: VWD1 A, Wavelength=220 nm

| Peak # | RetTime [min] | Type | Width [min] | Area [mAU*s] | Height [mAU] | Area %  |
|--------|---------------|------|-------------|--------------|--------------|---------|
| 1      | 19.475        | BB   | 0.3199      | 1.87052e4    | 925.16742    | 36.0138 |
| 2      | 20.612        | BB   | 0.3418      | 1.41789e4    | 662.27148    | 27.2990 |
| 3      | 23.608        | MM   | 0.3875      | 1.76323e4    | 758.41406    | 33.9480 |
| 4      | 25.706        | BB   | 0.1763      | 626.37567    | 56.10244     | 1.2060  |
| 5      | 26.069        | BB   | 0.2048      | 796.36420    | 58.49071     | 1.5333  |

Totals : 5.19391e4 2460.44612

| Product         | Rt (min) | Area (%) |
|-----------------|----------|----------|
| Hexapeptide I   | 19.475   | 36.0     |
| Aspartimide II  | 20.612   | 27.3     |
| Piperidides III | 23.608   | 34.0     |
|                 | 25.706   | 1.2      |
|                 | 26.069   | 1.5      |

**Figure S56.** Chromatogram of H-Ala-Lys-Asp-Gly-Tyr-Ile-OH after resin-bound peptide stress test with **20% piperidine** in NBP, 4 h at RT

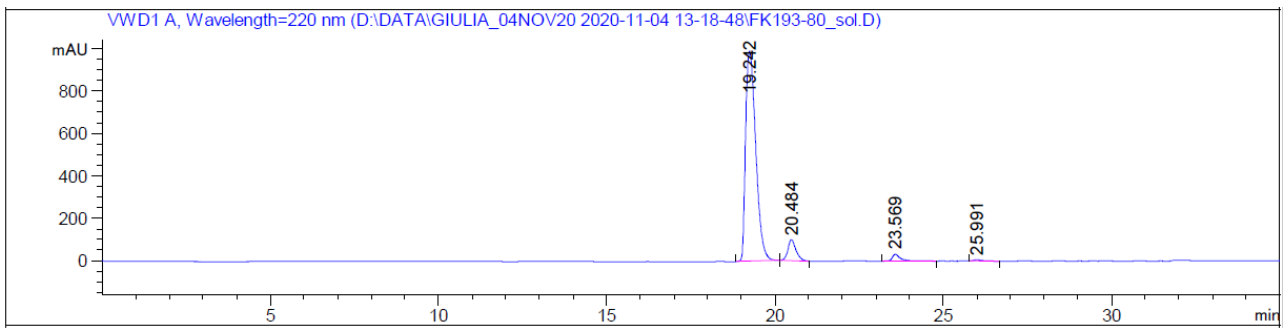

Signal 2: VWD1 A, Wavelength=220 nm

| Peak # | RetTime [min] | Type | Width [min] | Area [mAU*s] | Height [mAU] | Area %  |
|--------|---------------|------|-------------|--------------|--------------|---------|
| 1      | 19.242        | BB   | 0.3362      | 2.06937e4    | 988.57520    | 90.0042 |
| 2      | 20.484        | BB   | 0.2451      | 1627.94458   | 98.36476     | 7.0805  |
| 3      | 23.569        | BB   | 0.2536      | 565.35999    | 31.46964     | 2.4590  |
| 4      | 25.991        | BB   | 0.2716      | 104.91269    | 5.78369      | 0.4563  |

Totals : 2.29919e4 1124.19329

| Product         | Rt (min) | Area (%) |
|-----------------|----------|----------|
| Hexapeptide I   | 19.242   | 90.0     |
| Aspartimide II  | 20.484   | 7.1      |
| Piperidides III | 23.569   | 2.4      |
|                 | 25.991   | 0.5      |

**Figure S57.** Chromatogram of H-Ala-Lys-Asp-Gly-Tyr-Ile-OH after resin-bound peptide stress test with **20% piperidine** in NBP, 4 h at 40°C

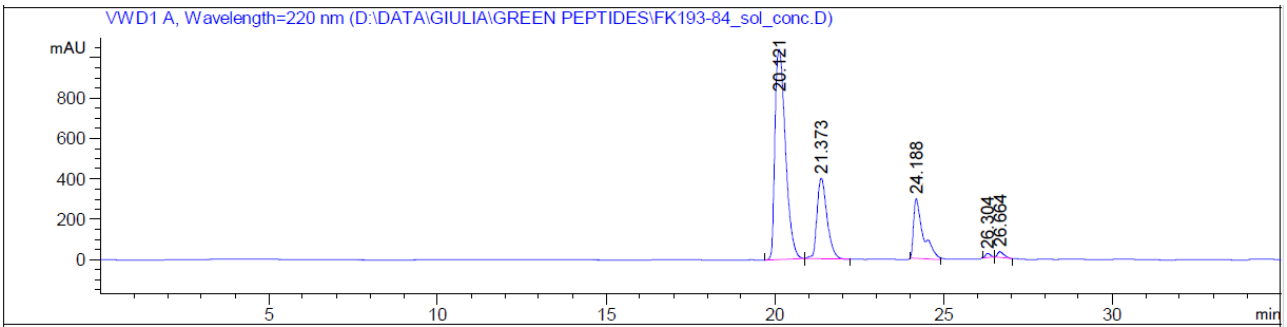

Signal 2: VWD1 A, Wavelength=220 nm

| Peak # | RetTime [min] | Type | Width [min] | Area [mAU*s] | Height [mAU] | Area %  |
|--------|---------------|------|-------------|--------------|--------------|---------|
| 1      | 20.121        | BB   | 0.3409      | 2.23503e4    | 1039.07520   | 60.4709 |
| 2      | 21.373        | BB   | 0.3211      | 8260.61230   | 399.67758    | 22.3499 |
| 3      | 24.188        | MM   | 0.3269      | 5760.25195   | 293.66702    | 15.5849 |
| 4      | 26.304        | BB   | 0.1605      | 199.76794    | 19.66879     | 0.5405  |
| 5      | 26.664        | BB   | 0.2015      | 389.51898    | 28.49531     | 1.0539  |

Totals : 3.69605e4 1780.58389

| Product         | Rt (min) | Area (%) |
|-----------------|----------|----------|
| Hexapeptide I   | 20.121   | 60.5     |
| Aspartimide II  | 21.373   | 22.3     |
| Piperidides III | 24.188   | 15.6     |
|                 | 26.304   | 0.5      |
|                 | 26.664   | 1.1      |

**Figure S58.** Chromatogram of H-Ala-Lys-Asp-Gly-Tyr-Ile-OH after resin-bound peptide stress test with **20% piperidine in NOP, 4 h at RT**

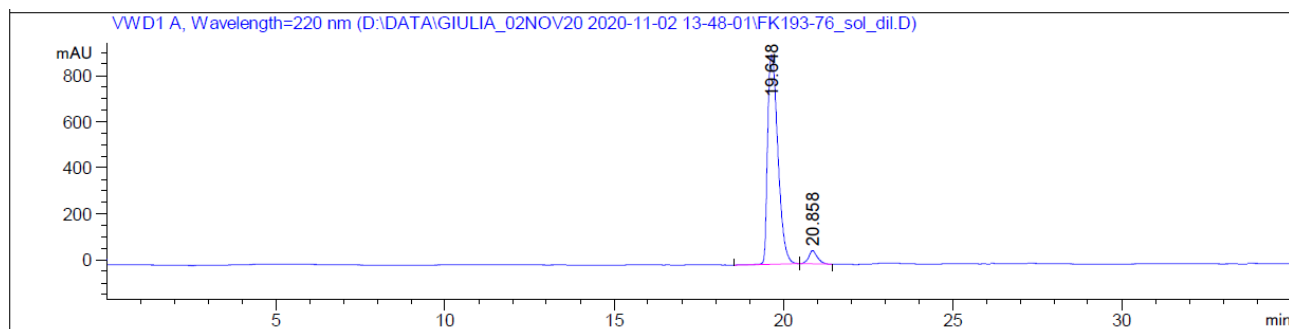

Signal 2: VWD1 A, Wavelength=220 nm

| Peak # | RetTime [min] | Type | Width [min] | Area [mAU*s] | Height [mAU] | Area %  |
|--------|---------------|------|-------------|--------------|--------------|---------|
| 1      | 19.648        | BB   | 0.3335      | 1.91386e4    | 909.46179    | 94.9092 |
| 2      | 20.858        | BB   | 0.2556      | 1026.57214   | 57.68584     | 5.0908  |

Totals : 2.01652e4 967.14763

| Product        | Rt (min) | Area (%) |
|----------------|----------|----------|
| Hexapeptide I  | 19.648   | 94.9     |
| Aspartimide II | 20.858   | 5.1      |

**Figure S59.** Chromatogram of H-Ala-Lys-Asp-Gly-Tyr-Ile-OH after resin-bound peptide stress test with **20% piperidine in NOP, 4 h at 40°C**

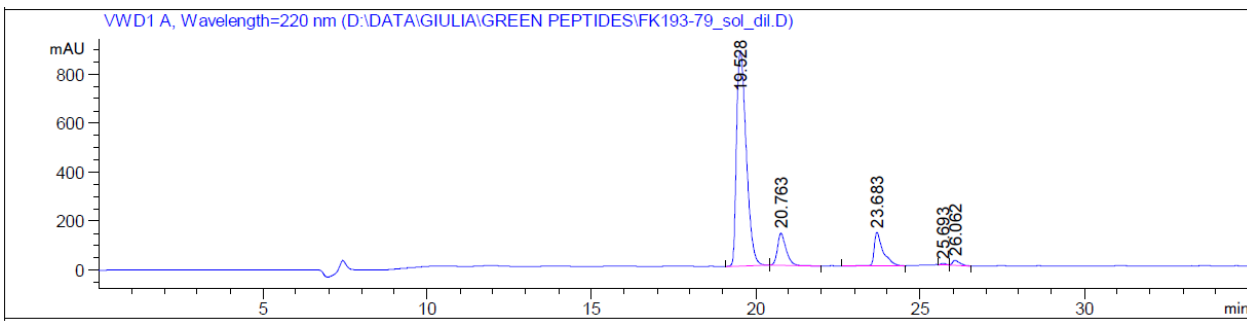

Signal 2: VWD1 A, Wavelength=220 nm

| Peak # | RetTime [min] | Type | Width [min] | Area [mAU*s] | Height [mAU] | Area %  |
|--------|---------------|------|-------------|--------------|--------------|---------|
| 1      | 19.528        | BB   | 0.3246      | 1.81352e4    | 879.33728    | 77.0344 |
| 2      | 20.763        | BB   | 0.2690      | 2408.23291   | 131.89261    | 10.2296 |
| 3      | 23.683        | BB   | 0.2714      | 2640.74023   | 137.92331    | 11.2173 |
| 4      | 25.693        | BB   | 0.1527      | 63.87175     | 6.61015      | 0.2713  |
| 5      | 26.062        | BB   | 0.2120      | 293.64609    | 20.39544     | 1.2473  |

Totals : 2.35417e4 1176.15879

| Product         | Rt (min) | Area (%) |
|-----------------|----------|----------|
| Hexapeptide I   | 19.528   | 77.0     |
| Aspartimide II  | 20.763   | 10.2     |
| Piperidides III | 23.683   | 11.2     |
|                 | 25.693   | 0.3      |
|                 | 26.062   | 1.3      |

**Figure S60.** Chromatogram of H-Ala-Lys-Asp-Gly-Tyr-Ile-OH after resin-bound peptide stress test with **20% TBA in DMF, 4 h at RT**

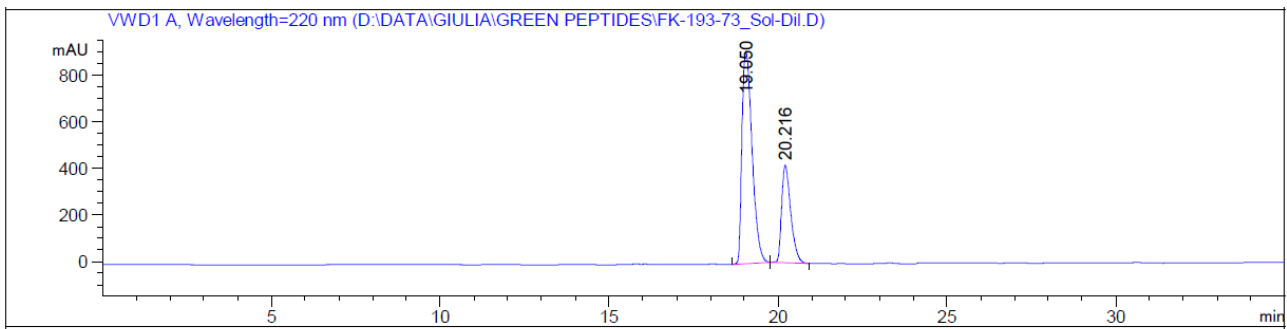

Signal 2: VWD1 A, Wavelength=220 nm

| Peak # | RetTime [min] | Type | Width [min] | Area [mAU*s] | Height [mAU] | Area %  |
|--------|---------------|------|-------------|--------------|--------------|---------|
| 1      | 19.050        | BB   | 0.3309      | 1.89397e4    | 909.70319    | 70.6713 |
| 2      | 20.216        | BB   | 0.2920      | 7860.00977   | 416.85880    | 29.3287 |

Totals : 2.67998e4 1326.56198

| Product        | Rt (min) | Area (%) |
|----------------|----------|----------|
| Hexapeptide I  | 19.050   | 70.7     |
| Aspartimide II | 20.216   | 29.3     |

**Figure S61.** Chromatogram of H-Ala-Lys-Asp-Gly-Tyr-Ile-OH after resin-bound peptide stress test with **20% TBA in NBP, 4 h at RT**

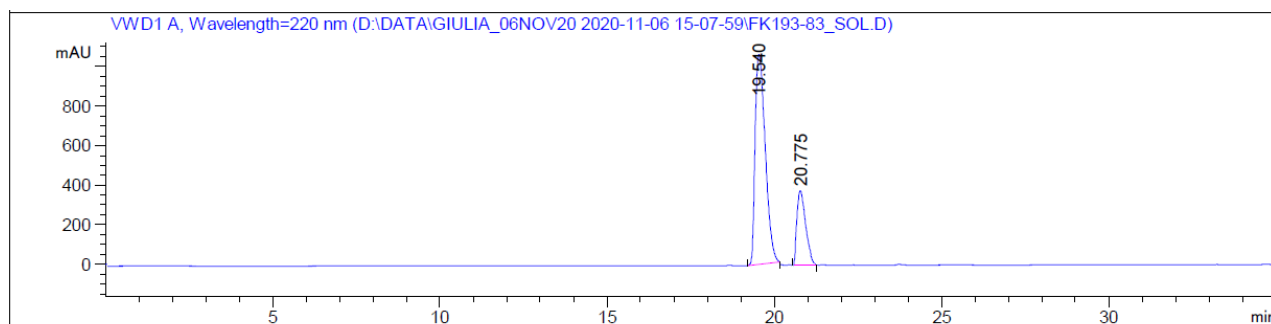

Signal 2: VWD1 A, Wavelength=220 nm

| Peak # | RetTime [min] | Type | Width [min] | Area [mAU*s] | Height [mAU] | Area %  |
|--------|---------------|------|-------------|--------------|--------------|---------|
| 1      | 19.540        | MM   | 0.3882      | 2.49102e4    | 1069.39648   | 79.4854 |
| 2      | 20.775        | MM   | 0.2991      | 6429.13867   | 358.22852    | 20.5146 |

Totals : 3.13393e4 1427.62500

| Product        | Rt (min) | Area (%) |
|----------------|----------|----------|
| Hexapeptide I  | 19.540   | 79.5     |
| Aspartimide II | 20.775   | 20.5     |

**Figure S62.** Chromatogram of H-Ala-Lys-Asp-Gly-Tyr-Ile-OH after resin-bound peptide stress test with **20% TBA in NOP, 4 h at RT**

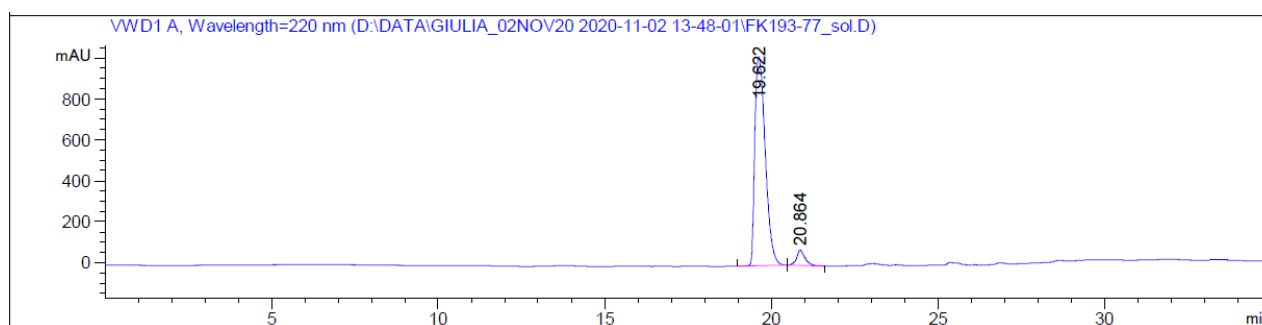

Signal 2: VWD1 A, Wavelength=220 nm

| Peak # | RetTime [min] | Type | Width [min] | Area [mAU*s] | Height [mAU] | Area %  |
|--------|---------------|------|-------------|--------------|--------------|---------|
| 1      | 19.622        | BB   | 0.3455      | 2.21684e4    | 1020.20471   | 94.5109 |
| 2      | 20.864        | BB   | 0.2512      | 1287.50720   | 73.93987     | 5.4891  |

Totals : 2.34559e4 1094.14458

| Product        | Rt (min) | Area (%) |
|----------------|----------|----------|
| Hexapeptide I  | 19.622   | 94.5     |
| Aspartimide II | 20.864   | 5.5      |

**Figure S63.** Chromatogram of H-Ala-Lys-Asp-Gly-Tyr-Ile-OH after resin-bound peptide stress test with **5% TMG in DMF, 4 h at RT**

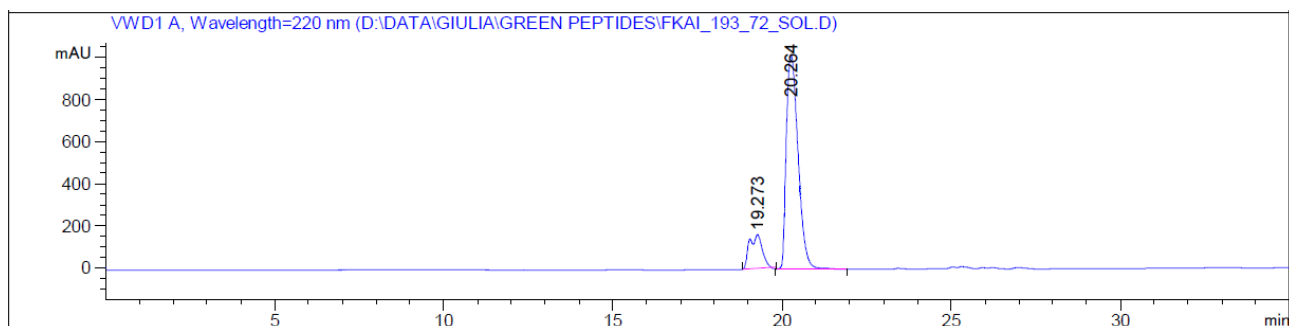

Signal 2: VWD1 A, Wavelength=220 nm

| Peak # | RetTime [min] | Type | Width [min] | Area [mAU*s] | Height [mAU] | Area %  |
|--------|---------------|------|-------------|--------------|--------------|---------|
| 1      | 19.273        | MM   | 0.4367      | 4177.47363   | 159.41856    | 14.4741 |
| 2      | 20.264        | BB   | 0.3906      | 2.46842e4    | 1019.00739   | 85.5259 |

Totals : 2.88617e4 1178.42595

| Product                                          | Rt (min) | Area (%) |
|--------------------------------------------------|----------|----------|
| Hexapeptide I<br>( $\alpha$ and $\beta$ peptide) | 19.273   | 14.5     |
| Aspartimide II                                   | 20.264   | 85.5     |

**Figure S64.** Chromatogram of H-Ala-Lys-Asp-Gly-Tyr-Ile-OH after resin-bound peptide stress test with **5% TMG in NBP, 4 h at RT**

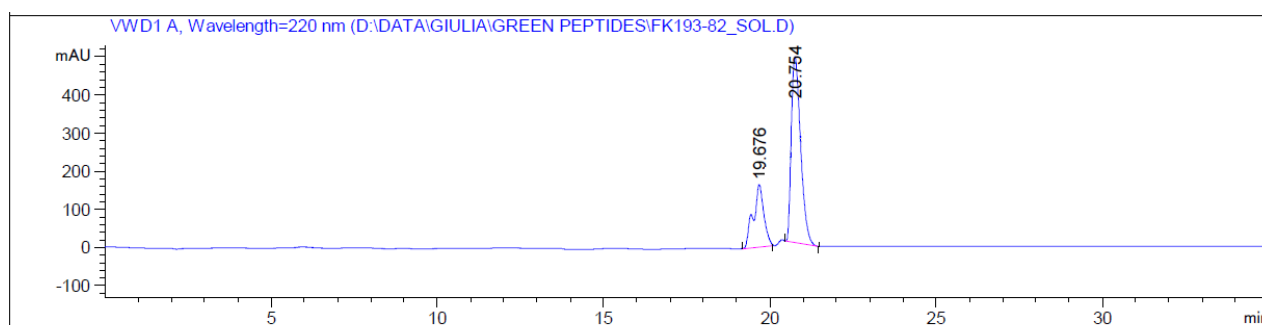

Signal 2: VWD1 A, Wavelength=220 nm

| Peak # | RetTime [min] | Type | Width [min] | Area [mAU*s] | Height [mAU] | Area %  |
|--------|---------------|------|-------------|--------------|--------------|---------|
| 1      | 19.676        | MM   | 0.3718      | 3682.07764   | 165.06819    | 27.8769 |
| 2      | 20.754        | BB   | 0.3037      | 9526.28027   | 488.03809    | 72.1231 |

Totals : 1.32084e4 653.10628

| Product                                          | Rt (min) | Area (%) |
|--------------------------------------------------|----------|----------|
| Hexapeptide I<br>( $\alpha$ and $\beta$ peptide) | 19.676   | 27.9     |
| Aspartimide II                                   | 20.754   | 72.1     |

**Figure S65.** Chromatogram of H-Ala-Lys-Asp-Gly-Tyr-Ile-OH after resin-bound peptide stress test with **5% TMG in NOP, 4 h at RT**

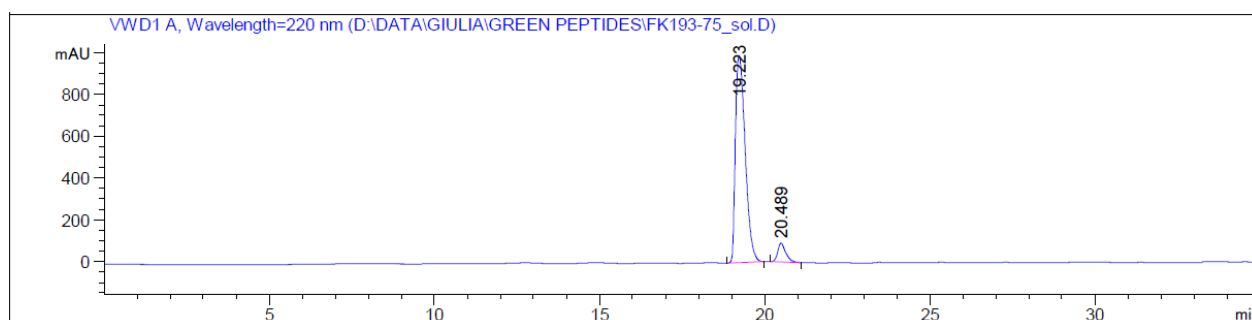

Signal 2: VWD1 A, Wavelength=220 nm

| Peak # | RetTime [min] | Type | Width [min] | Area [mAU*s] | Height [mAU] | Area %  |
|--------|---------------|------|-------------|--------------|--------------|---------|
| 1      | 19.223        | BB   | 0.3278      | 2.03609e4    | 990.78229    | 92.9980 |
| 2      | 20.489        | BB   | 0.2487      | 1533.01807   | 90.93493     | 7.0020  |

Totals : 2.18939e4 1081.71722

| Product        | Rt (min) | Area (%) |
|----------------|----------|----------|
| Hexapeptide I  | 19.223   | 93.0     |
| Aspartimide II | 20.489   | 7.0      |

**Figure S66.** Chromatogram of H-Ala-Lys-Asp-Gly-Tyr-Ile-OH after resin-bound peptide stress test with **10% DEAPA in DMF, 4 h at RT**

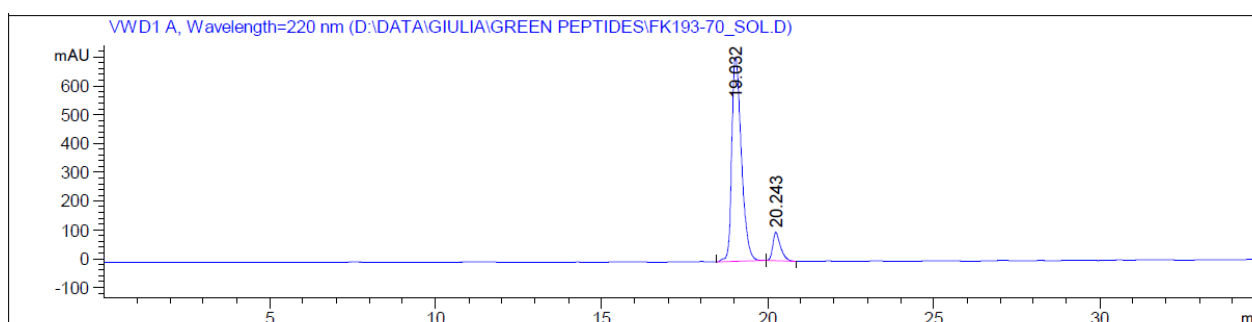

Signal 2: VWD1 A, Wavelength=220 nm

| Peak # | RetTime [min] | Type | Width [min] | Area [mAU*s] | Height [mAU] | Area %  |
|--------|---------------|------|-------------|--------------|--------------|---------|
| 1      | 19.032        | BB   | 0.3135      | 1.43151e4    | 709.01990    | 89.9476 |
| 2      | 20.243        | BB   | 0.2394      | 1599.82861   | 98.56615     | 10.0524 |

Totals : 1.59149e4 807.58604

| Product        | Rt (min) | Area (%) |
|----------------|----------|----------|
| Hexapeptide I  | 19.032   | 89.9     |
| Aspartimide II | 20.243   | 10.1     |

**Figure S67.** Chromatogram of H-Ala-Lys-Asp-Gly-Tyr-Ile-OH after resin-bound peptide stress test with **10% DEAPA in NBP, 4 h at RT**

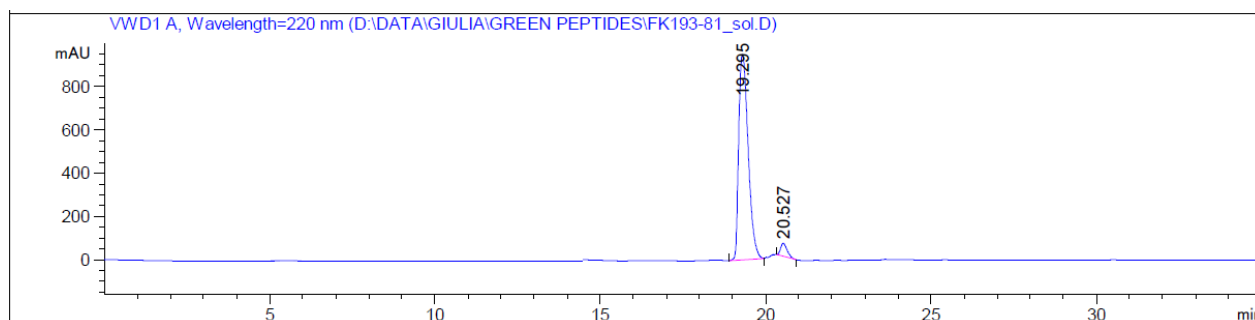

Signal 2: VWD1 A, Wavelength=220 nm

| Peak # | RetTime [min] | Type | Width [min] | Area [mAU*s] | Height [mAU] | Area %  |
|--------|---------------|------|-------------|--------------|--------------|---------|
| 1      | 19.295        | BB   | 0.3123      | 1.86919e4    | 946.90442    | 95.7341 |
| 2      | 20.527        | BB   | 0.2062      | 832.91559    | 60.67286     | 4.2659  |

Totals : 1.95248e4 1007.57728

| Product        | Rt (min) | Area (%) |
|----------------|----------|----------|
| Hexapeptide I  | 19.295   | 95.7     |
| Aspartimide II | 20.527   | 4.3      |

**Figure S68.** Chromatogram of H-Ala-Lys-Asp-Gly-Tyr-Ile-OH after resin-bound peptide stress test with **10% DEAPA in NOP, 4 h at RT**

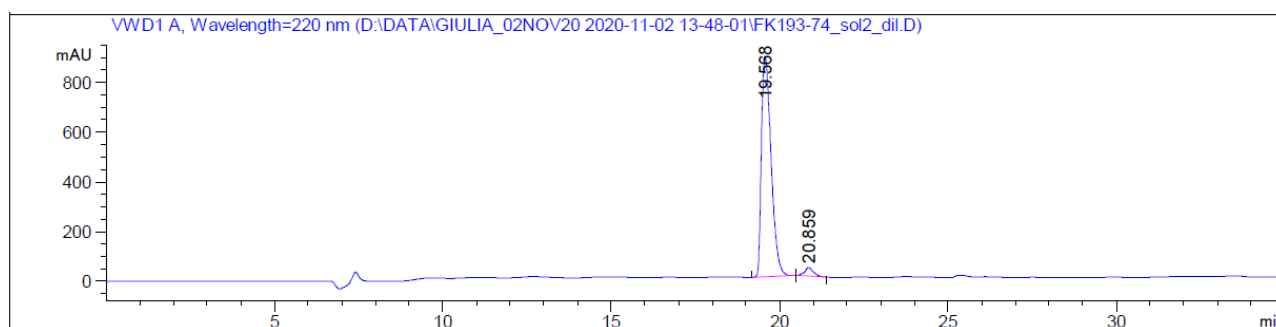

Signal 2: VWD1 A, Wavelength=220 nm

| Peak # | RetTime [min] | Type | Width [min] | Area [mAU*s] | Height [mAU] | Area %  |
|--------|---------------|------|-------------|--------------|--------------|---------|
| 1      | 19.568        | BB   | 0.3138      | 1.77667e4    | 886.47058    | 96.5934 |
| 2      | 20.859        | BB   | 0.2590      | 626.59259    | 34.64211     | 3.4066  |

Totals : 1.83933e4 921.11269

| Product        | Rt (min) | Area (%) |
|----------------|----------|----------|
| Hexapeptide I  | 19.568   | 96.6     |
| Aspartimide II | 20.859   | 3.4      |

**Figure S69.** Chromatogram of H-Ala-Lys-Asp-Gly-Tyr-Ile-OH after resin-bound peptide stress test with **10% DEAPA in NOP, 4 h at 40°C**

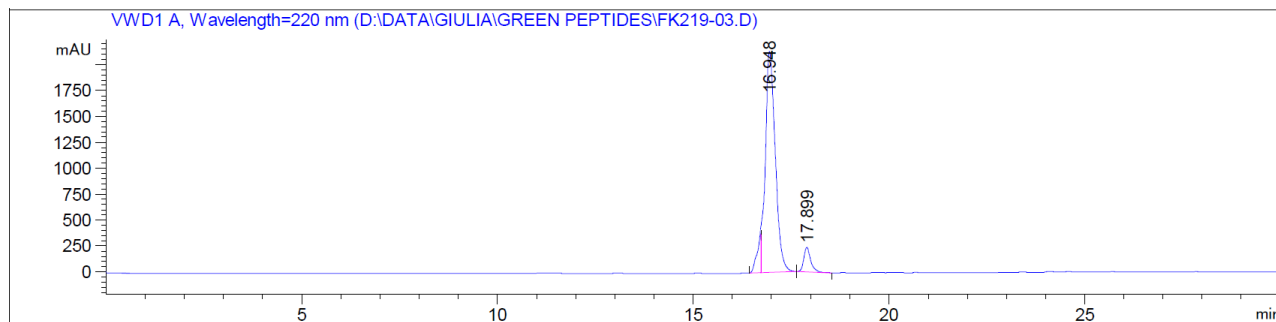

Signal 2: VWD1 A, Wavelength=220 nm

| Peak # | RetTime [min] | Type | Width [min] | Area [mAU*s] | Height [mAU] | Area %  |
|--------|---------------|------|-------------|--------------|--------------|---------|
| 1      | 16.701        | MM   | 0.1043      | 2232.41602   | 356.66306    | 4.9869  |
| 2      | 16.948        | MM   | 0.3055      | 3.96522e4    | 2163.40869   | 88.5777 |
| 3      | 17.899        | BB   | 0.1842      | 2880.84839   | 236.36681    | 6.4354  |

Totals : 4.47655e4 2756.43855

| Product         | Rt (min) | Area (%) |
|-----------------|----------|----------|
| DEAPA adduct IV | 16.701   | 5.0      |
| Hexapeptide I   | 16.948   | 88.6     |
| Aspartimide II  | 17.899   | 6.4      |

**Figure S70.** Chromatogram of H-Ala-Lys-Asp-Gly-Tyr-Ile-OH after resin-bound peptide stress test with **10% DEAPA in NOP/DMC 8/2, 4 h at RT**

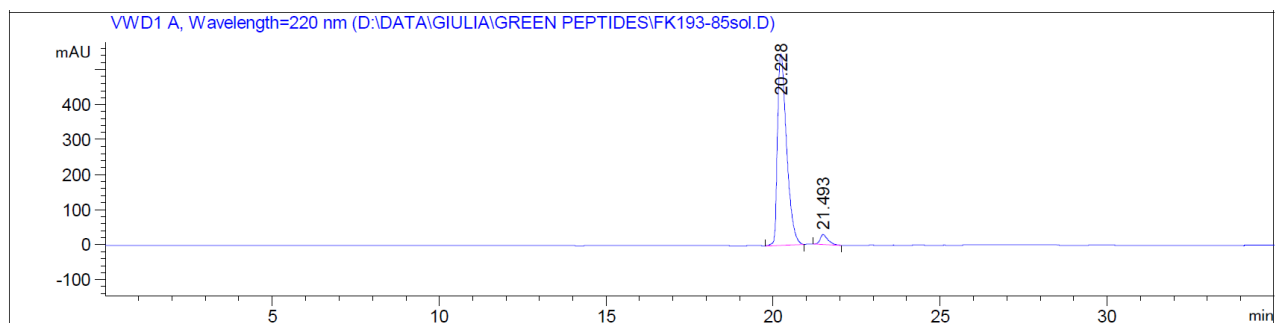

Signal 2: VWD1 A, Wavelength=220 nm

| Peak # | RetTime [min] | Type | Width [min] | Area [mAU*s] | Height [mAU] | Area %  |
|--------|---------------|------|-------------|--------------|--------------|---------|
| 1      | 20.228        | BB   | 0.2906      | 1.03250e4    | 546.04572    | 95.8007 |
| 2      | 21.493        | BB   | 0.2327      | 452.58197    | 28.28045     | 4.1993  |

Totals : 1.07776e4 574.32617

| Product        | Rt (min) | Area (%) |
|----------------|----------|----------|
| Hexapeptide I  | 20.228   | 95.8     |
| Aspartimide II | 21.493   | 4.2      |

**Figure S71.** Mass spectrum of H-Ala-Lys-Asp-Gly-Tyr-Ile-OH (hexapeptide I)

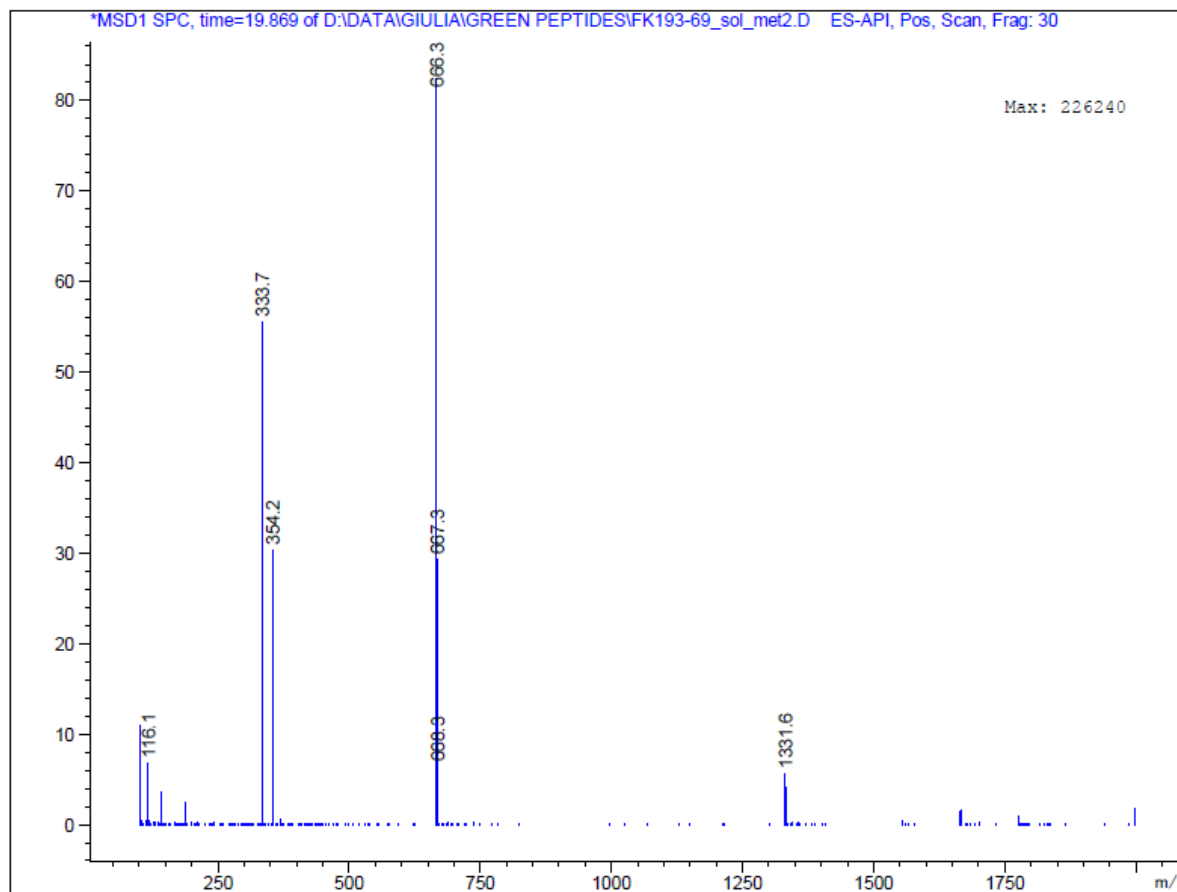

**Figure S72.** Mass spectrum of aspartimide II

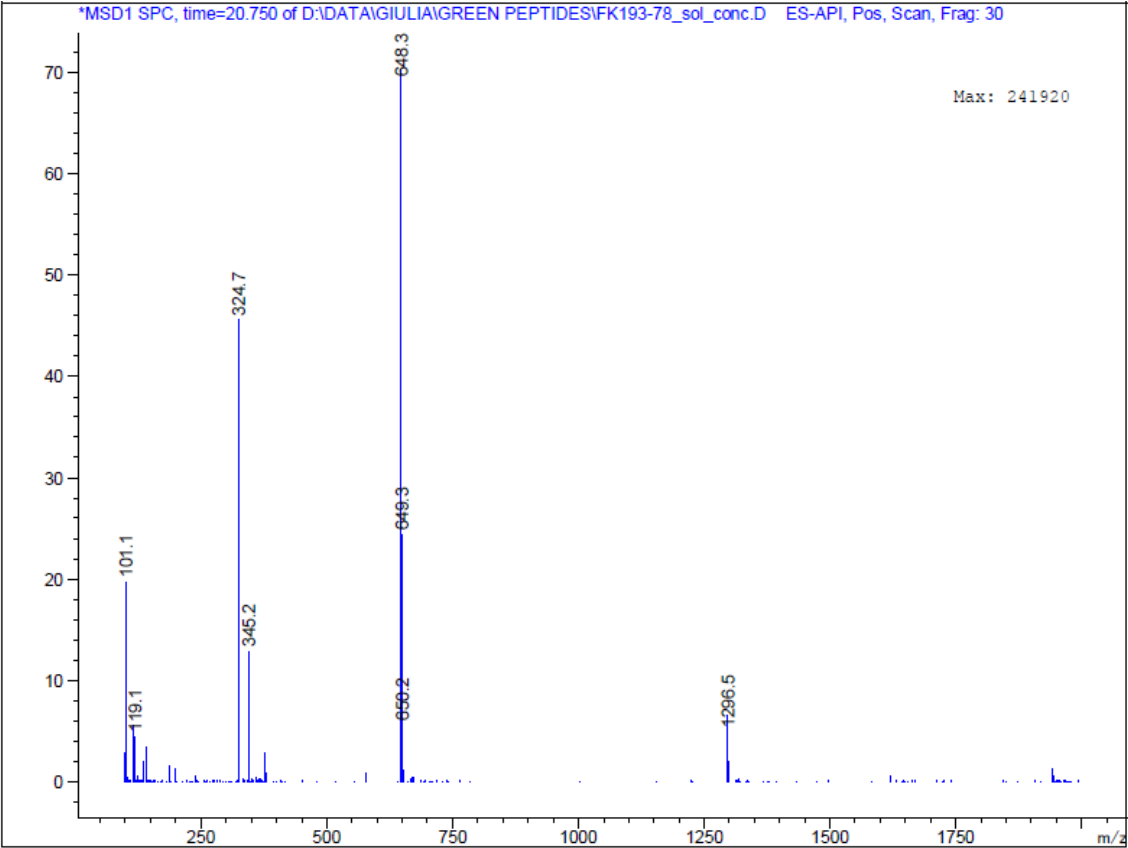

**Figure S73.** Mass spectrum of piperidides III

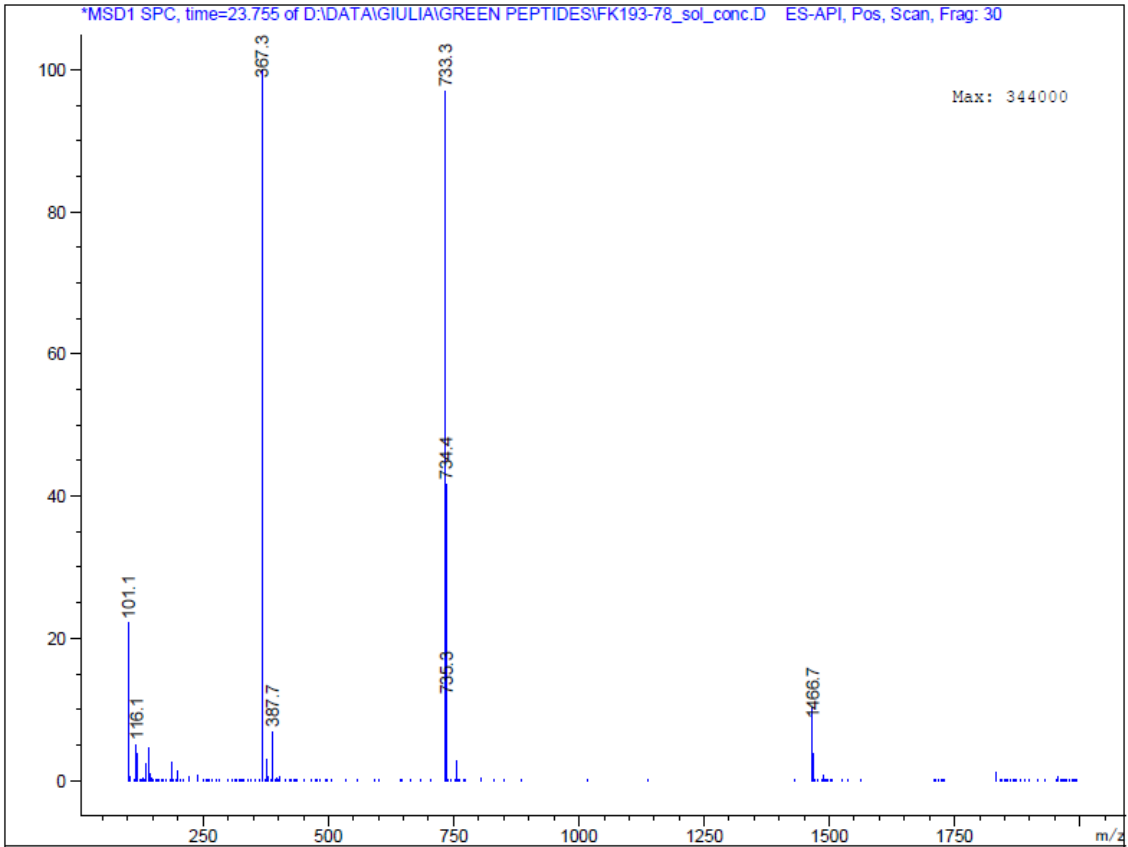

**Figure S74.** Mass spectrum of DEAPA adducts **IV**

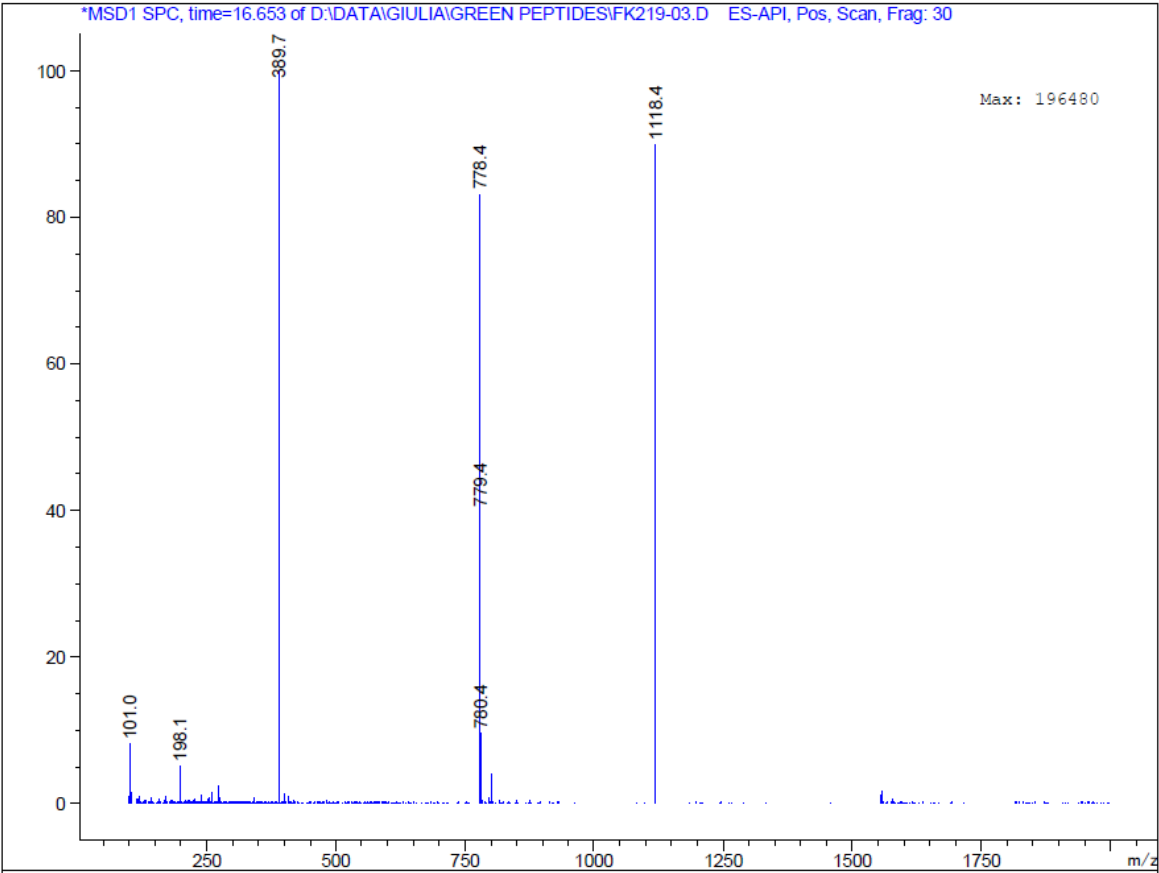

(L)-dihydroorotic fragment isomerization

Figure S75. Chromatogram of Degarelix at t=0

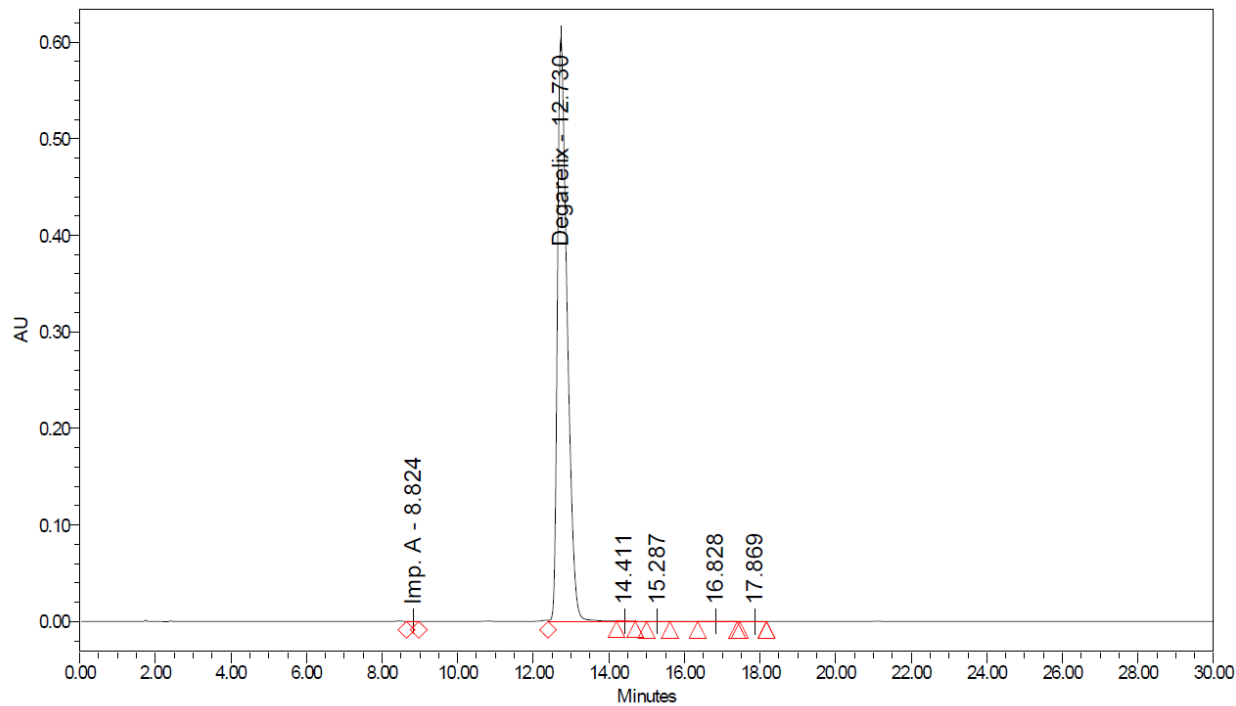

picchi > 0.025%

|   | Name      | RT    | Area     | % Area | RRT   |
|---|-----------|-------|----------|--------|-------|
| 1 | Imp. A    | 8.82  | 2938     | 0.03   | 0.693 |
| 2 | Degarelix | 12.73 | 10769657 | 99.91  | 1.000 |

| Product      | Rt (min) | Area (%) |
|--------------|----------|----------|
| Hydantoin VI | 8.824    | 0.03     |
| Degarelix V  | 12.730   | 99.97    |

**Figure S76.** Chromatogram of Degarelix after stress test with **10% piperidine** in DMF, 24 h at RT

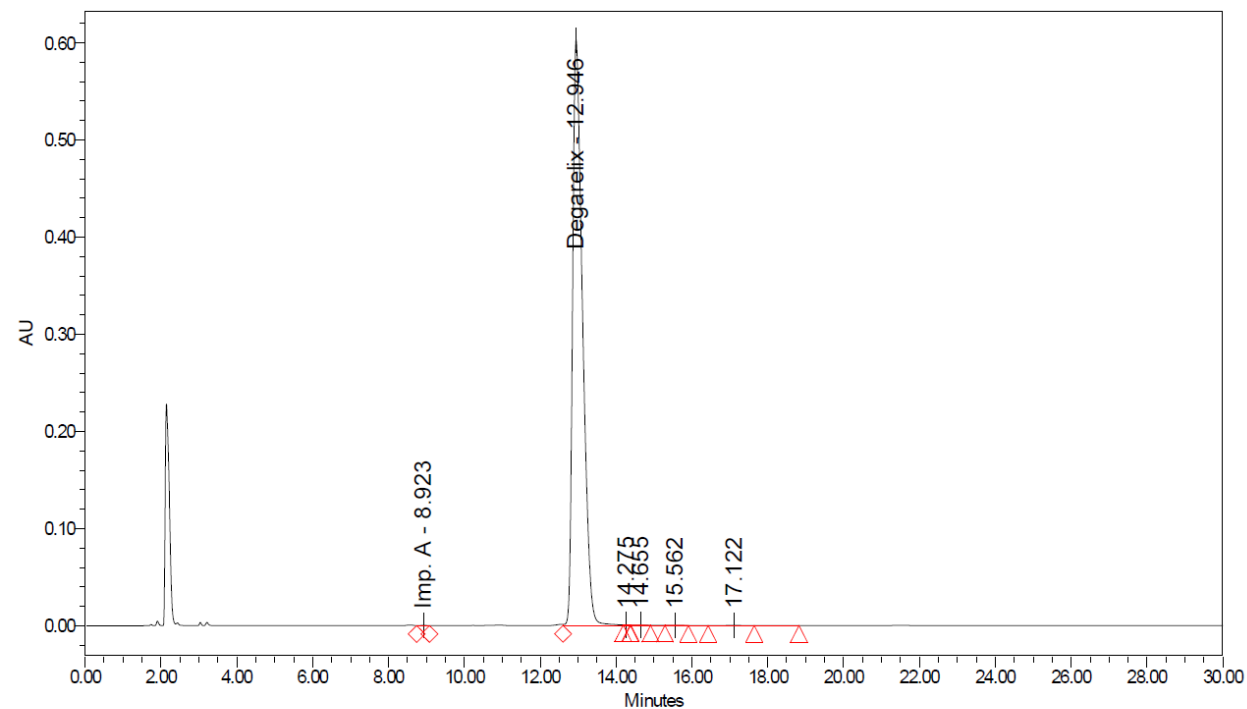

|   | Name      | RT    | Area     | % Area | RRT   |
|---|-----------|-------|----------|--------|-------|
| 1 | Imp. A    | 8.92  | 3863     | 0.04   | 0.689 |
| 2 | Degarelix | 12.95 | 10966991 | 99.90  | 1.000 |
| 3 |           | 14.66 | 2978     | 0.03   | 1.132 |
| 4 |           | 17.12 | 3767     | 0.03   | 1.323 |

| Product      | Rt (min) | Area (%) |
|--------------|----------|----------|
| Hydantoin VI | 8.923    | 0.04     |
| Degarelix V  | 12.946   | 99.96    |

**Figure S77.** Chromatogram of Degarelix after stress test with **10% TMG** in DMF, 24 h at RT

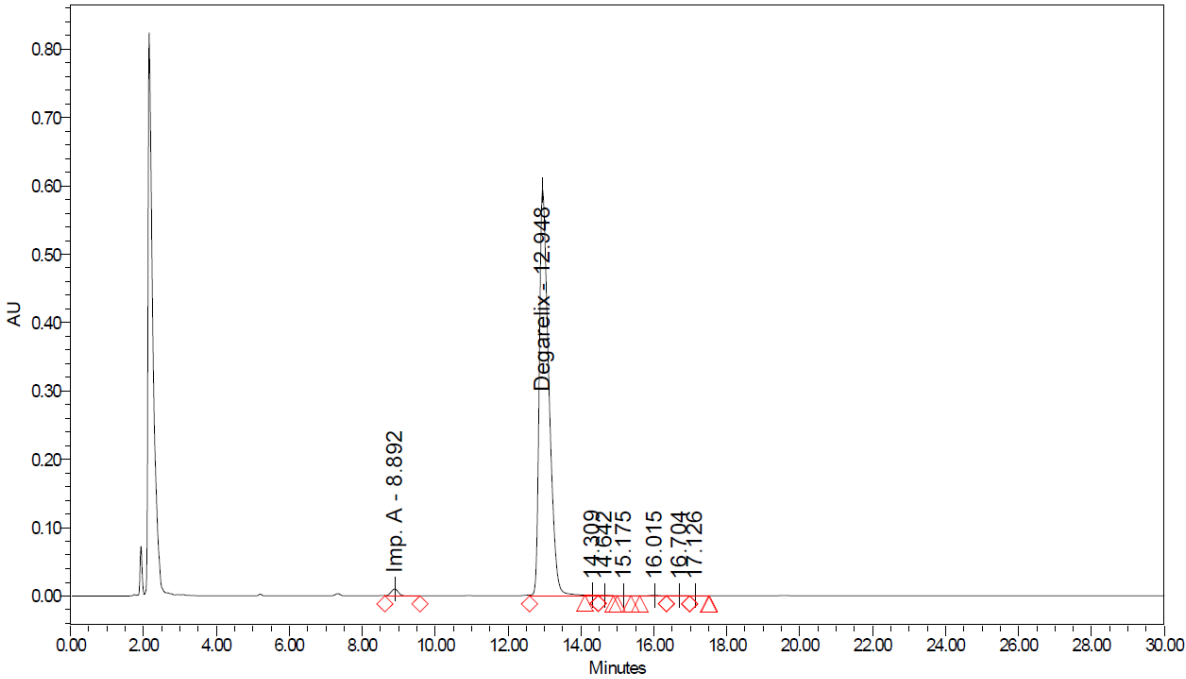

|   | Name      | RT    | Area     | % Area | RRT   |
|---|-----------|-------|----------|--------|-------|
| 1 | Imp. A    | 8.89  | 142550   | 1.30   | 0.687 |
| 2 | Degarelix | 12.95 | 10840484 | 98.50  | 1.000 |
| 3 |           | 14.64 | 3262     | 0.03   | 1.131 |
| 4 |           | 16.01 | 10922    | 0.10   | 1.237 |
| 5 |           | 16.70 | 4136     | 0.04   | 1.290 |

| Product      | Rt (min) | Area (%) |
|--------------|----------|----------|
| Hydantoin VI | 8.892    | 1.3      |
| Degarelix V  | 12.948   | 98.7     |

**Figure S78.** Chromatogram of Degarelix after stress test with **10% TBA** in DMF, 24 h at RT

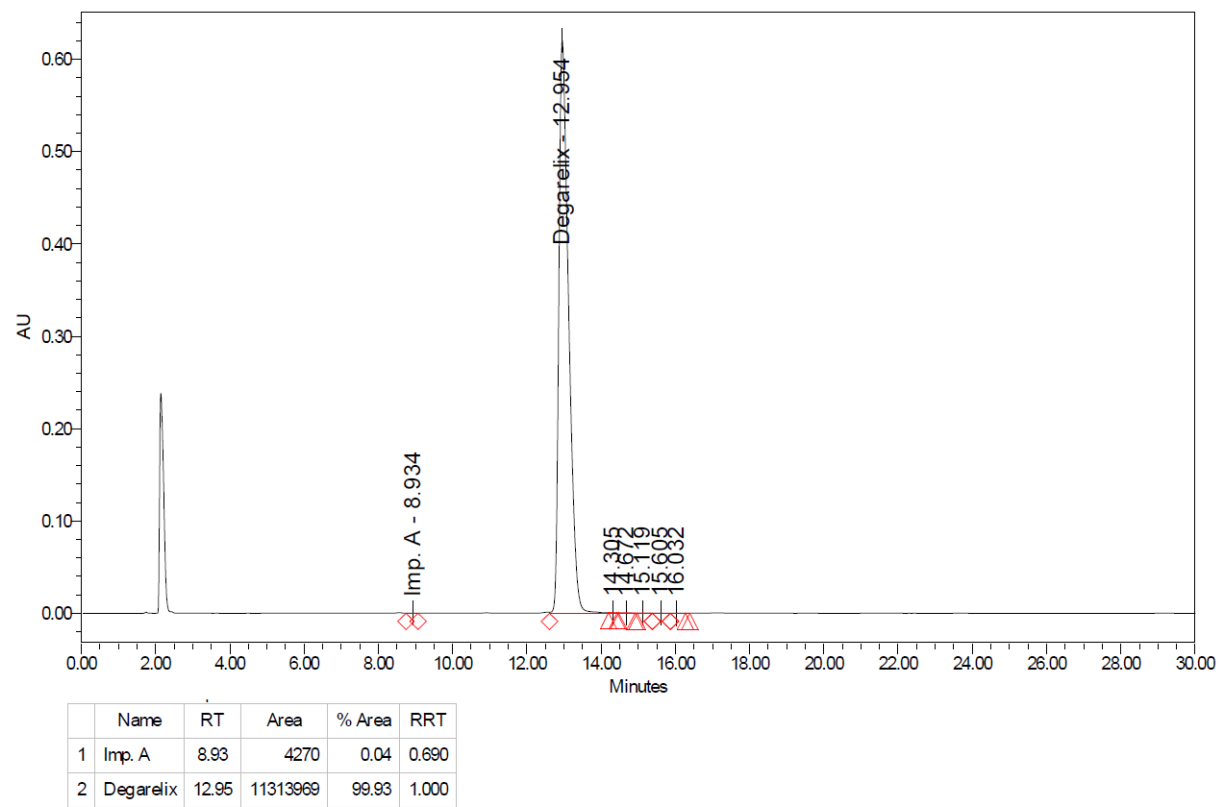

| Product      | Rt (min) | Area (%) |
|--------------|----------|----------|
| Hydantoin VI | 8.934    | 0.04     |
| Degarelix V  | 12.954   | 99.96    |

**Figure S79.** Chromatogram of Degarelix after stress test with **10% DEAPA** in DMF, 24 h at RT

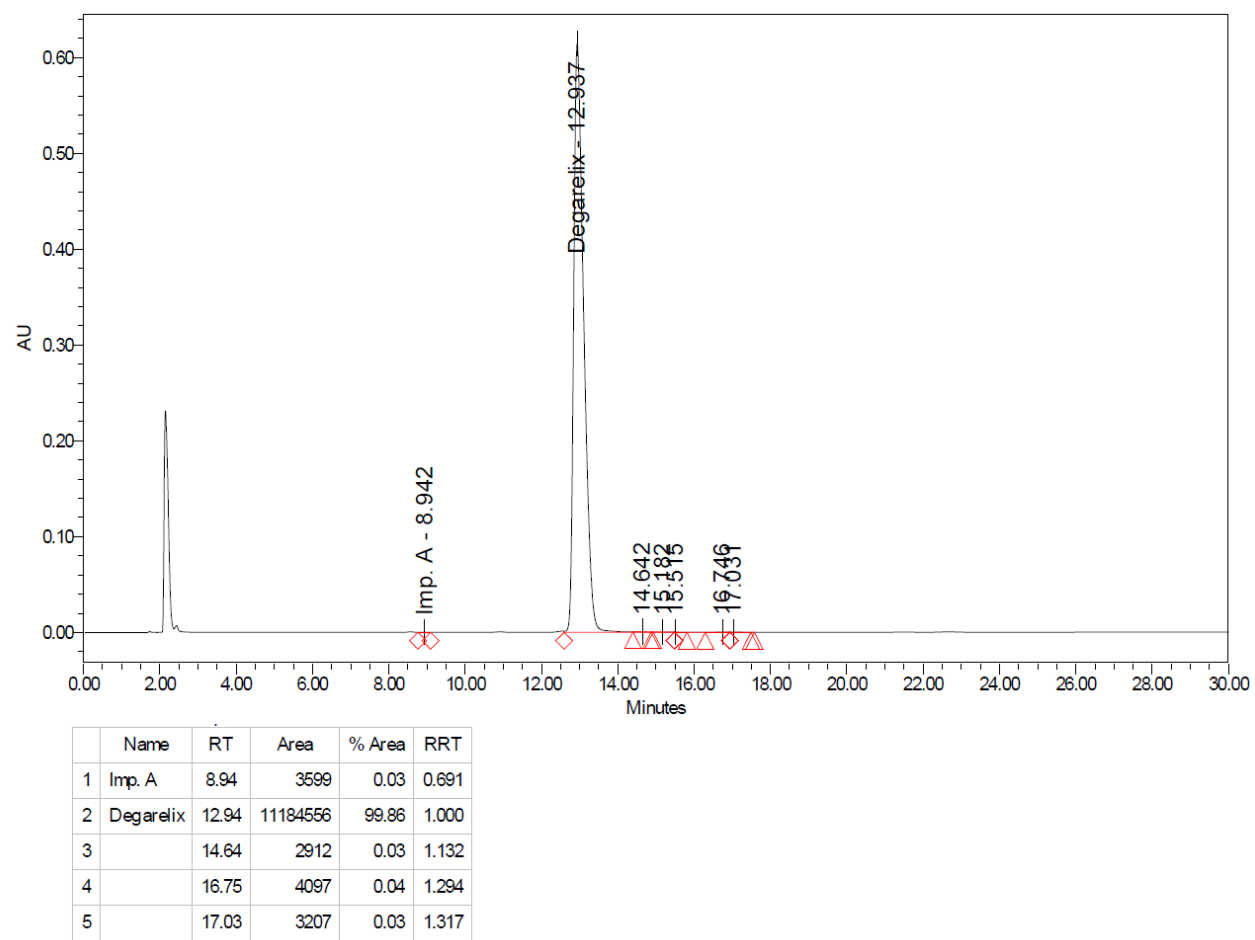

| Product      | Rt (min) | Area (%) |
|--------------|----------|----------|
| Hydantoin VI | 8.942    | 0.03     |
| Degarelix V  | 12.937   | 99.97    |

# SPPS of Aib-Enkephalin in NOP

**Figure S80.** Chromatogram of Aib-Enkephalin, manual SPPS in NOP with **20% TBA** as deprotection solution

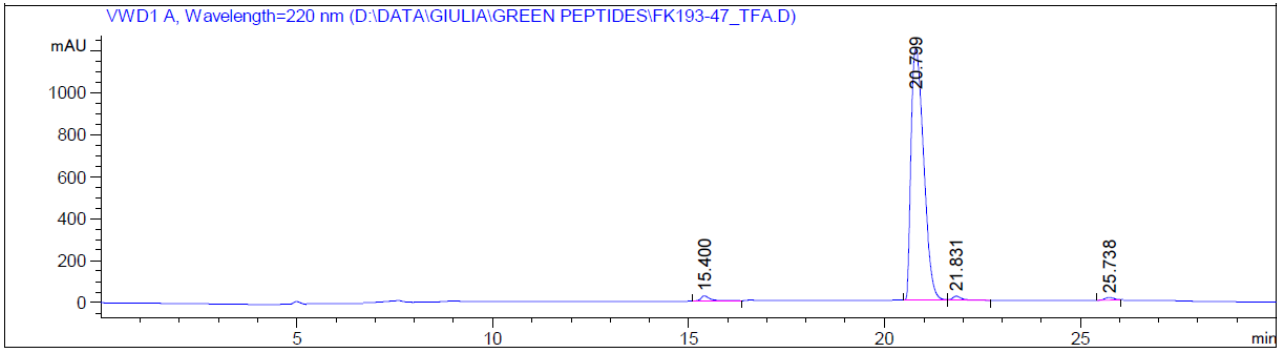

Signal 2: VWD1 A, Wavelength=220 nm

| Peak # | RetTime [min] | Type | Width [min] | Area [mAU*s] | Height [mAU] | Area %  |
|--------|---------------|------|-------------|--------------|--------------|---------|
| 1      | 15.400        | BB   | 0.2299      | 357.34210    | 22.67599     | 1.3046  |
| 2      | 20.799        | BB   | 0.3597      | 2.66358e4    | 1196.59863   | 97.2463 |
| 3      | 21.831        | BB   | 0.2096      | 229.77277    | 16.38626     | 0.8389  |
| 4      | 25.738        | BB   | 0.2509      | 167.13870    | 10.54478     | 0.6102  |

Totals : 2.73901e4 1246.20566

| Peptide            | Rt (min) | Area (%) |
|--------------------|----------|----------|
| Des-Phe            | 15.400   | 1.3      |
| Aib-Enkephalin     | 20.799   | 97.3     |
| Des-Aib            | 21.831   | 0.8      |
| Aib-Enkephalin+TFA | 25.738   | 0.6      |

**Figure S81.** Chromatogram of Aib-Enkephalin, manual SPPS in NOP with **5% TMG** as deprotection solution

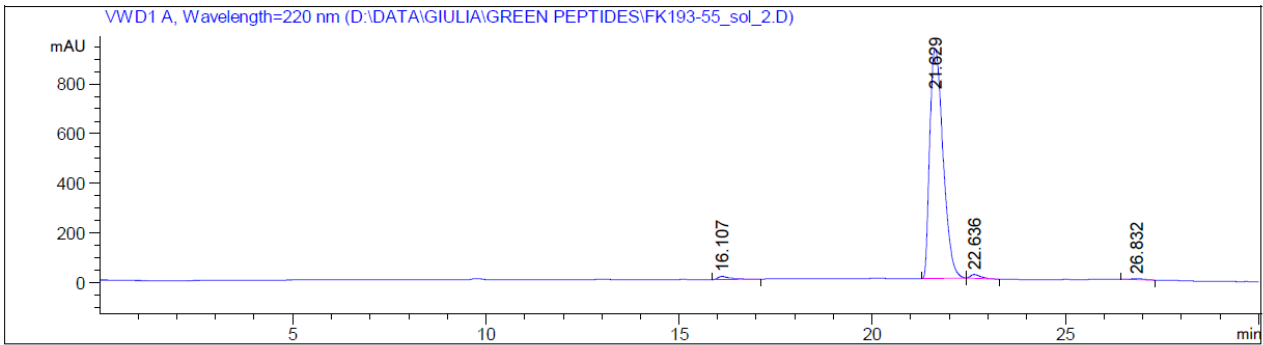

Signal 2: VWD1 A, Wavelength=220 nm

| Peak # | RetTime [min] | Type | Width [min] | Area [mAU*s] | Height [mAU] | Area %  |
|--------|---------------|------|-------------|--------------|--------------|---------|
| 1      | 16.107        | BB   | 0.3246      | 258.79755    | 11.49601     | 1.1419  |
| 2      | 21.629        | BB   | 0.3805      | 2.20396e4    | 923.18396    | 97.2419 |
| 3      | 22.636        | BB   | 0.2685      | 256.51566    | 14.77845     | 1.1318  |
| 4      | 26.832        | BB   | 0.3401      | 109.81307    | 5.00234      | 0.4845  |

Totals : 2.26647e4 954.46076

| Peptide            | Rt (min) | Area (%) |
|--------------------|----------|----------|
| Des-Phe            | 16.107   | 1.1      |
| Aib-Enkephalin     | 21.629   | 97.3     |
| Des-Aib            | 22.636   | 1.1      |
| Aib-Enkephalin+TFA | 26.832   | 0.5      |

**Figure S82.** Chromatogram of Aib-Enkephalin, manual SPPS in NOP with **10% DEAPA** as deprotection solution

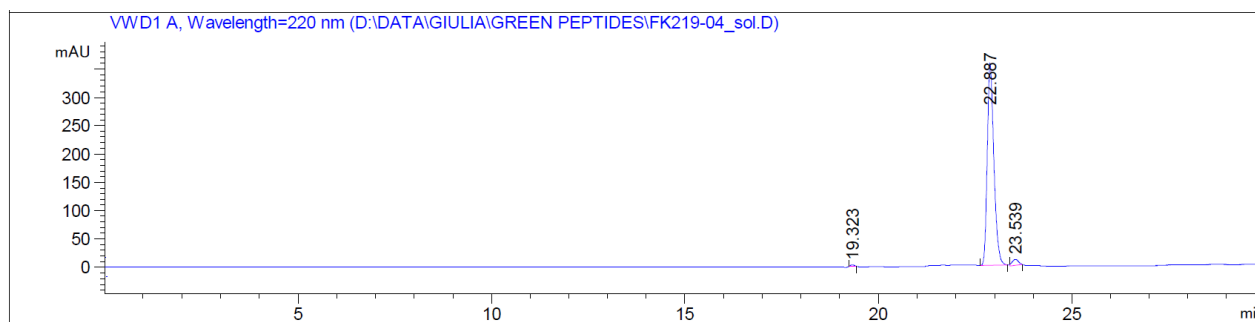

Signal 2: VWD1 A, Wavelength=220 nm

| Peak # | RetTime [min] | Type | Width [min] | Area [mAU*s] | Height [mAU] | Area %  |
|--------|---------------|------|-------------|--------------|--------------|---------|
| 1      | 19.323        | MM   | 0.1034      | 14.80165     | 2.38595      | 0.3369  |
| 2      | 22.887        | BB   | 0.1835      | 4266.15869   | 356.70010    | 97.0994 |
| 3      | 23.539        | MM   | 0.1795      | 112.63808    | 10.45851     | 2.5637  |

Totals : 4393.59843 369.54456

| Peptide        | Rt (min) | Area (%) |
|----------------|----------|----------|
| Des-Tyr        | 19.323   | 0.3      |
| Aib-Enkephalin | 22.887   | 97.1     |
| Des-Aib        | 23.539   | 2.6      |

**Figure S83.** Chromatogram of Aib-Enkephalin, manual SPPS in NOP with **10% DEAPA** as deprotection solution and deprotection steps pre Fmoc-Aib-OH insertion at 40°C

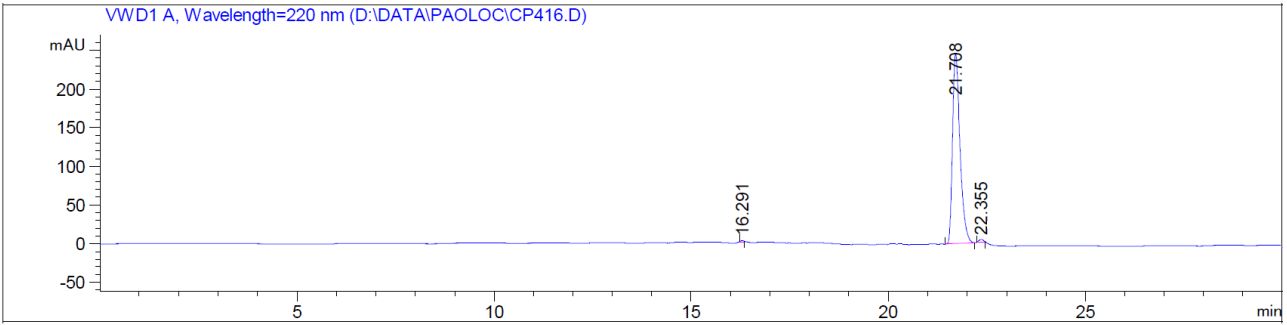

Signal 2: VWD1 A, Wavelength=220 nm

| Peak # | RetTime [min] | Type | Width [min] | Area [mAU*s] | Height [mAU] | Area %  |
|--------|---------------|------|-------------|--------------|--------------|---------|
| 1      | 16.291        | MM   | 0.0987      | 13.42192     | 2.26539      | 0.4094  |
| 2      | 21.708        | BB   | 0.1991      | 3230.95776   | 246.19342    | 98.5618 |
| 3      | 22.355        | MM   | 0.1381      | 33.72318     | 4.06926      | 1.0287  |

Totals : 3278.10286 252.52807

| Peptide        | Rt (min) | Area (%) |
|----------------|----------|----------|
| Des-Phe        | 16.291   | 0.4      |
| Aib-Enkephalin | 21.708   | 98.6     |
| Des-Aib        | 22.355   | 1.0      |

**Figure S84.** Chromatogram of Aib-Enkephalin, manual SPPS in NOP/DMC 8/2 with **10% DEAPA** as deprotection solution

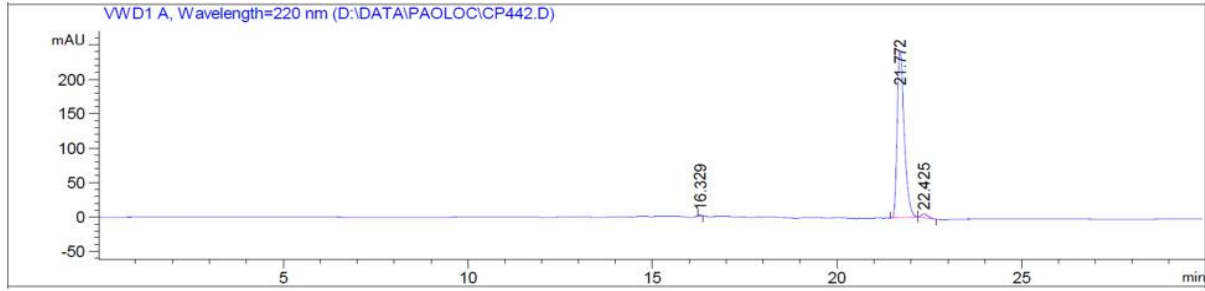

Signal 2: VWD1 A, Wavelength=220 nm

| Peak # | RetTime [min] | Type | Width [min] | Area [mAU*s] | Height [mAU] | Area %  |
|--------|---------------|------|-------------|--------------|--------------|---------|
| 1      | 16.329        | MM   | 0.1097      | 14.90592     | 2.26539      | 0.4497  |
| 2      | 21.772        | BB   | 0.1991      | 3230.95776   | 246.19342    | 97.4781 |
| 3      | 22.425        | BB   | 0.1875      | 68.68263     | 5.66201      | 2.0722  |

Totals : 3314.54631 254.12082

| Peptide        | Rt (min) | Area (%) |
|----------------|----------|----------|
| Des-Phe        | 16.329   | 0.4      |
| Aib-Enkephalin | 21.772   | 97.5     |
| Des-Aib        | 22.425   | 2.1      |

**Figure S85.** Mass spectrum of H-Tyr-Aib-Aib-Phe-Leu-OH (Aib-Enkephalin)

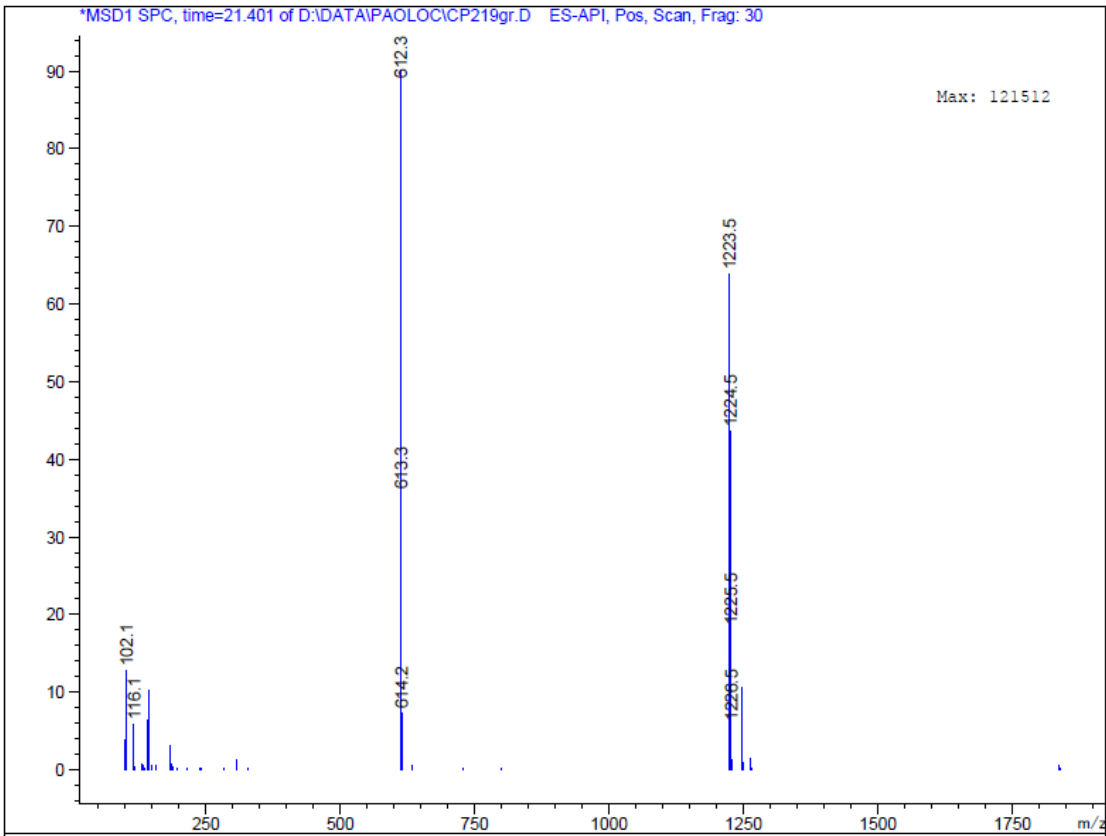

**Figure S86.** Mass spectrum of H-Tyr-Aib-Aib-Phe-Leu-OH + TFA (Aib-Enkephalin+TFA)

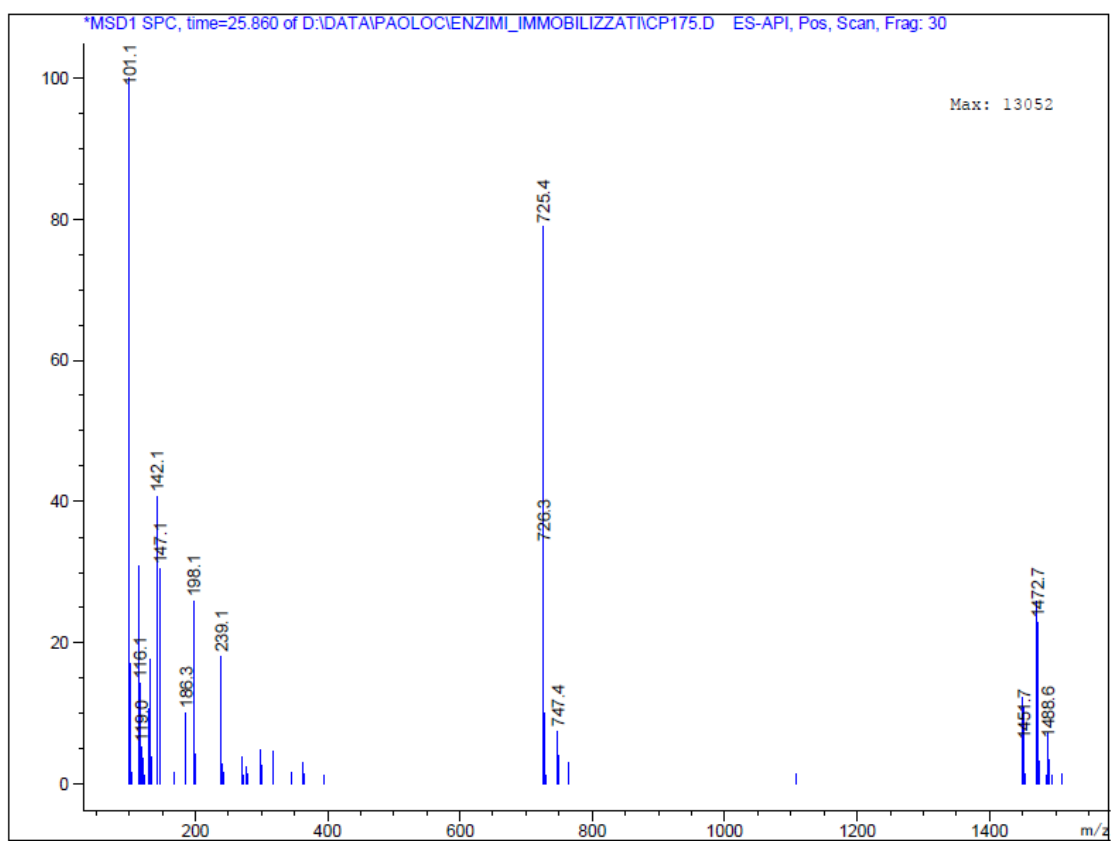

**Figure S87.** Mass spectrum of H-Tyr-Aib-Phe-Leu-OH (des-Aib)

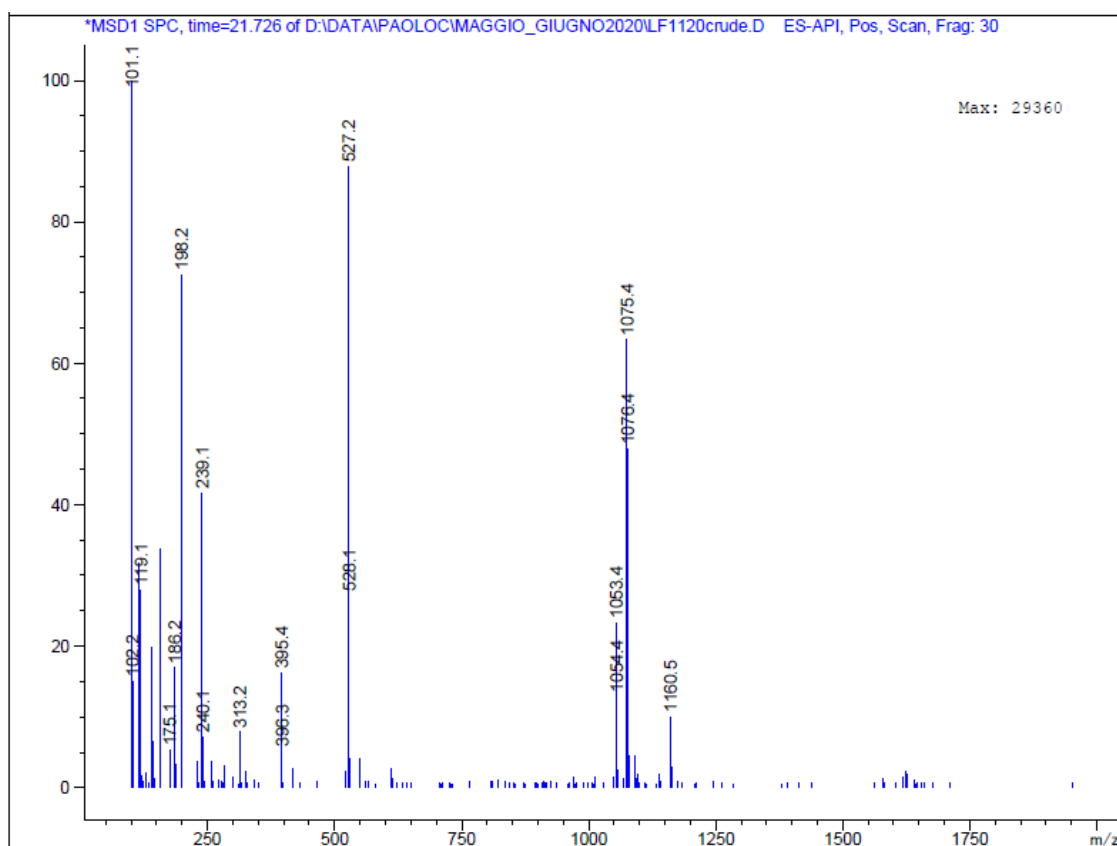

**Figure S88.** Mass spectrum of H-Tyr-Aib-Aib-Leu-OH (des-Phe)

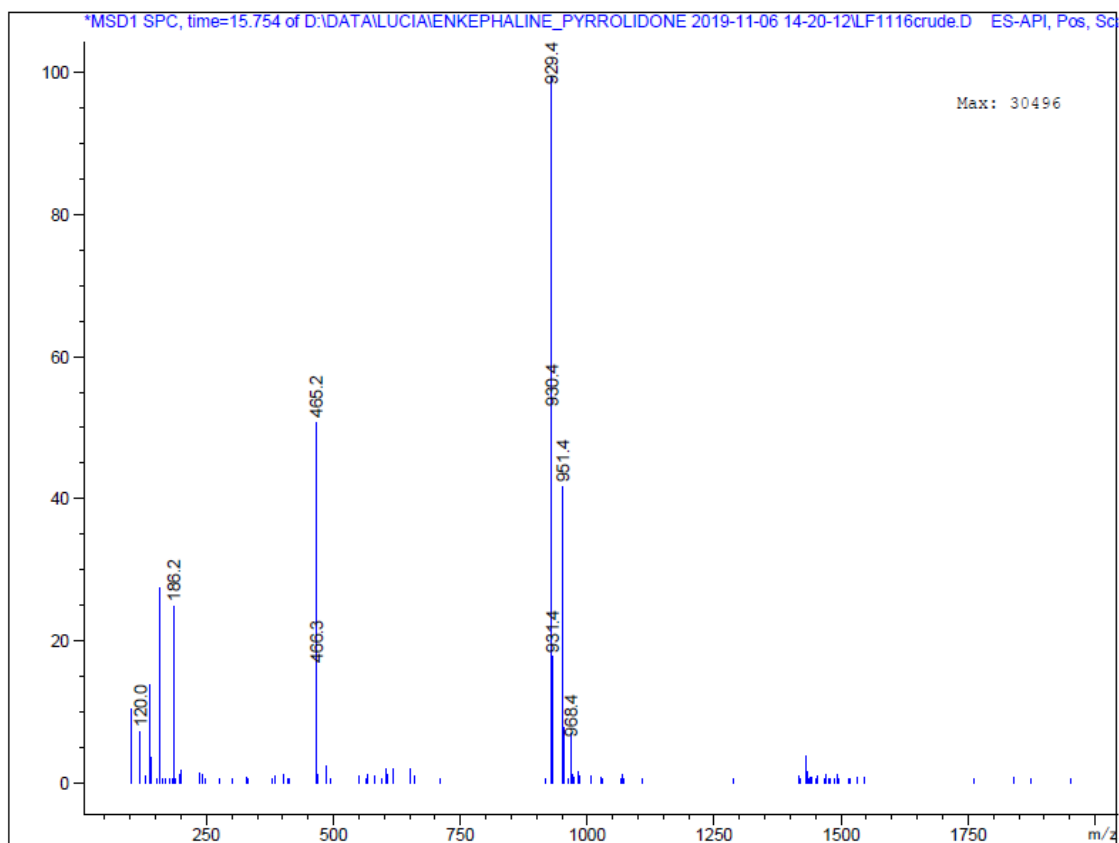

**Figure S89.** Mass spectrum of H-Aib-Aib-Phe-Leu-OH (des-Tyr)

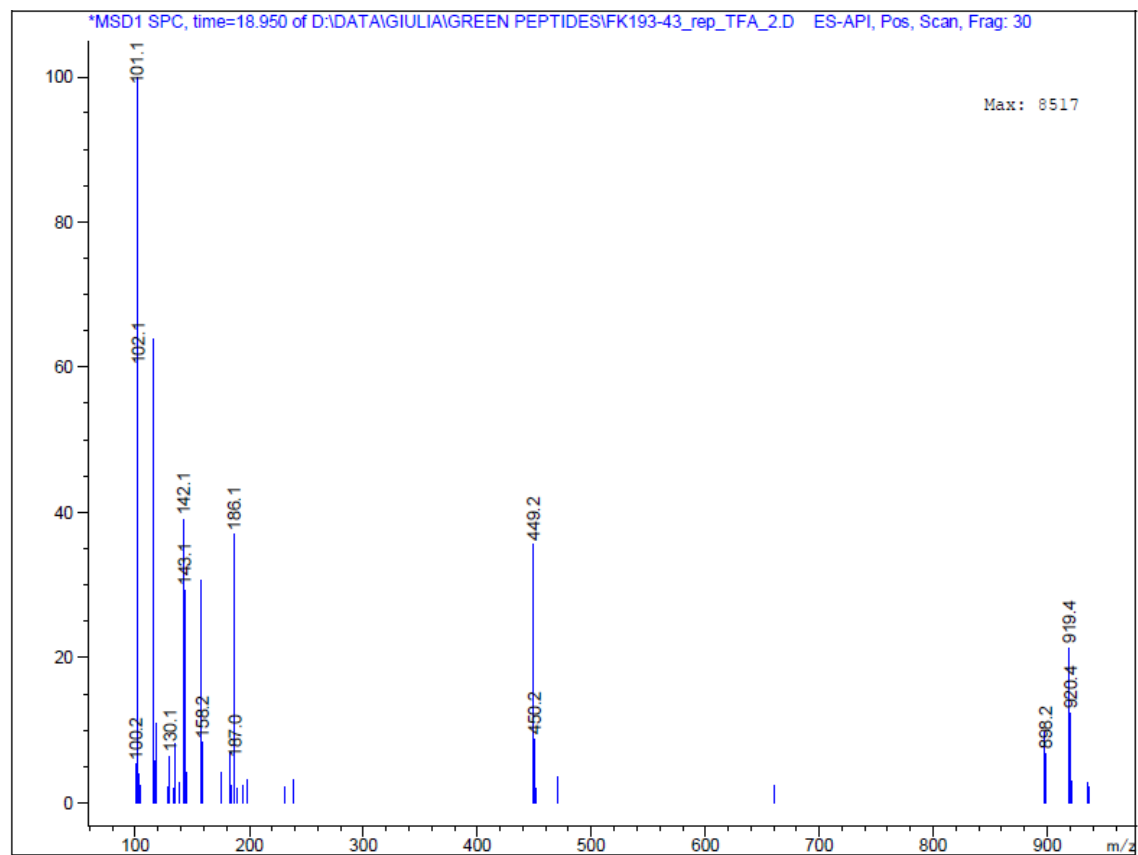

# SPPS of linear Octreotide

**Figure S90.** Chromatogram of linear Octreotide, manual SPPS in DMF with 10% DEAPA as deprotection solution

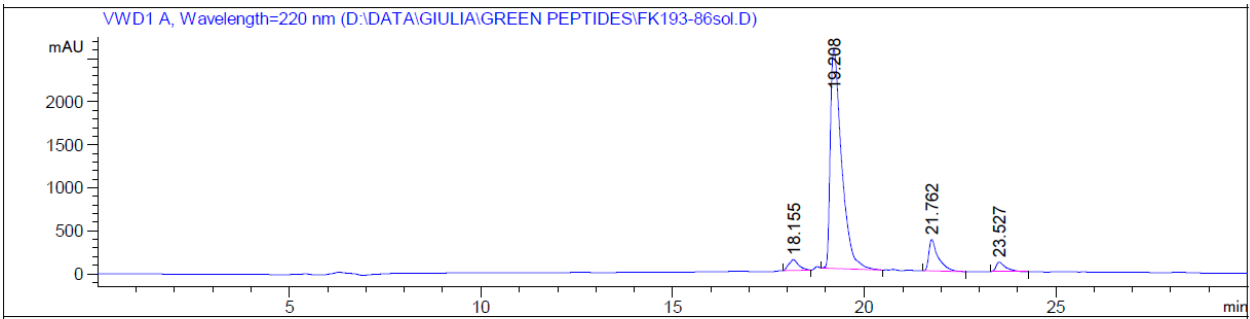

Signal 2: VWD1 A, Wavelength=220 nm

| Peak # | RetTime [min] | Type | Width [min] | Area [mAU*s] | Height [mAU] | Area %  |
|--------|---------------|------|-------------|--------------|--------------|---------|
| 1      | 18.155        | BB   | 0.2431      | 2267.19751   | 128.98524    | 3.6195  |
| 2      | 19.208        | BB   | 0.3053      | 5.23553e4    | 2552.87720   | 83.5828 |
| 3      | 21.762        | BB   | 0.2335      | 6061.45654   | 365.42905    | 9.6768  |
| 4      | 23.527        | BB   | 0.2534      | 1954.90027   | 109.96827    | 3.1209  |

Totals : 6.26388e4 3157.25976

| Peptide                       | Rt (min) | Area (%) |
|-------------------------------|----------|----------|
| Linear Octreotide N,O-shift 2 | 18.155   | 3.6      |
| Linear Octreotide             | 19.208   | 83.6     |
| Linear Octreotide+tBu         | 21.762   | 9.7      |
| Linear Octreotide+tBu2        | 23.527   | 3.1      |

**Figure S91.** Chromatogram of linear Octreotide, manual SPPS in NOP with 10% DEAPA as deprotection solution

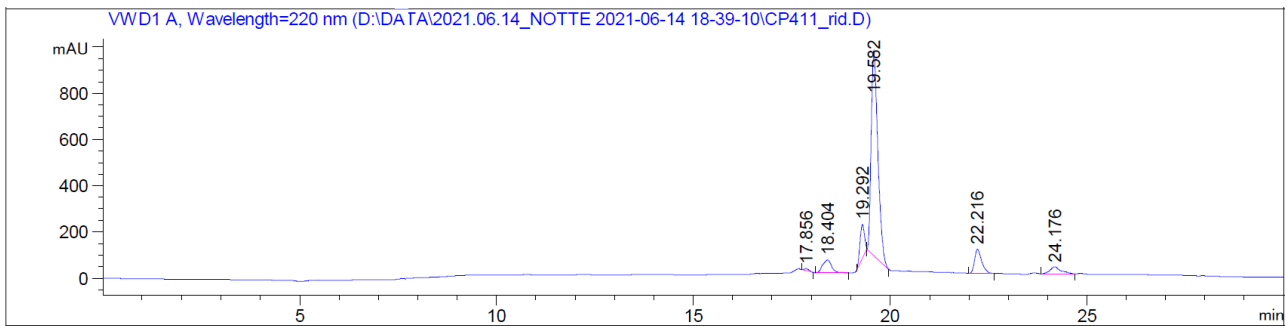

Signal 2: VWD1 A, Wavelength=220 nm

| Peak # | RetTime [min] | Type | Width [min] | Area [mAU*s] | Height [mAU] | Area %  |
|--------|---------------|------|-------------|--------------|--------------|---------|
| 1      | 17.856        | BB   | 0.1324      | 68.70734     | 8.31694      | 0.4721  |
| 2      | 18.404        | BB   | 0.2212      | 858.56342    | 55.26545     | 5.8990  |
| 3      | 19.292        | BB   | 0.1331      | 1210.08337   | 148.49017    | 8.3143  |
| 4      | 19.582        | BB   | 0.1824      | 1.05137e4    | 886.10333    | 72.2380 |
| 5      | 22.216        | BB   | 0.1878      | 1316.99585   | 105.35062    | 9.0488  |
| 6      | 24.176        | BB   | 0.2722      | 586.20697    | 30.50037     | 4.0277  |

Totals : 1.45543e4 1234.02690

| Peptide                       | Rt (min) | Area (%) |
|-------------------------------|----------|----------|
| Linear Octreotide N,O-shift 1 | 17.856   | 0.5      |
| Linear Octreotide N,O-shift 2 | 18.404   | 5.9      |
| Des-Cys <sup>7</sup>          | 19.292   | 8.3      |
| Linear Octreotide             | 19.582   | 72.2     |
| Linear Octreotide+tBu         | 22.216   | 9.0      |
| Linear Octreotide+tBu2        | 24.176   | 4.0      |

**Figure S92.** Chromatogram of linear Octreotide, manual SPPS in NOP with 10% DEAPA as deprotection solution and 4h initial swelling times

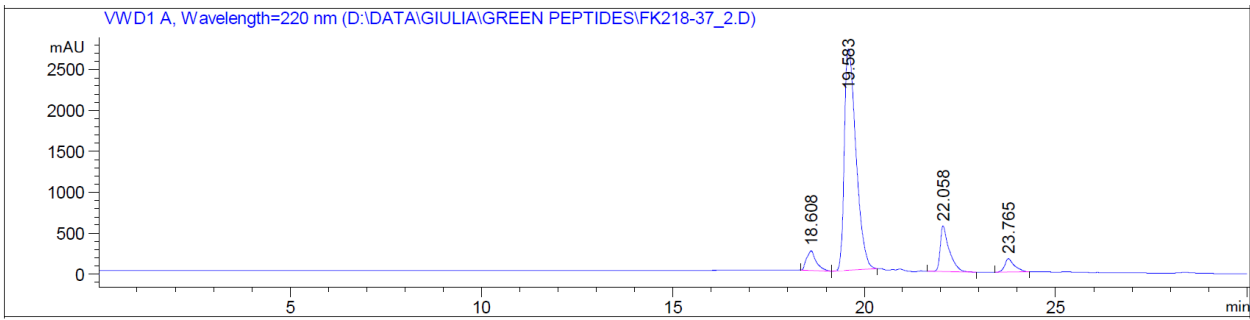

Signal 2: VWD1 A, Wavelength=220 nm

| Peak # | RetTime [min] | Type | Width [min] | Area [mAU*s] | Height [mAU] | Area %  |
|--------|---------------|------|-------------|--------------|--------------|---------|
| 1      | 18.608        | BB   | 0.2379      | 4155.06592   | 240.08929    | 5.5821  |
| 2      | 19.583        | BB   | 0.3289      | 5.81646e4    | 2705.12622   | 78.1415 |
| 3      | 22.058        | BB   | 0.2324      | 9134.56543   | 559.85425    | 12.2719 |
| 4      | 23.765        | BB   | 0.2571      | 2980.73828   | 164.73466    | 4.0045  |

Totals : 7.44349e4 3669.80443

| Peptide                       | Rt (min) | Area (%) |
|-------------------------------|----------|----------|
| Linear Octreotide N,O-shift 2 | 18.620   | 5.6      |
| Linear Octreotide             | 19.721   | 78.1     |
| Linear Octreotide+tBu         | 22.333   | 12.3     |
| Linear Octreotide+tBu2        | 24.432   | 4.0      |

**Figure S93.** Chromatogram of linear Octreotide, manual SPPS at 40°C in NOP with 10% DEAPA as deprotection solution

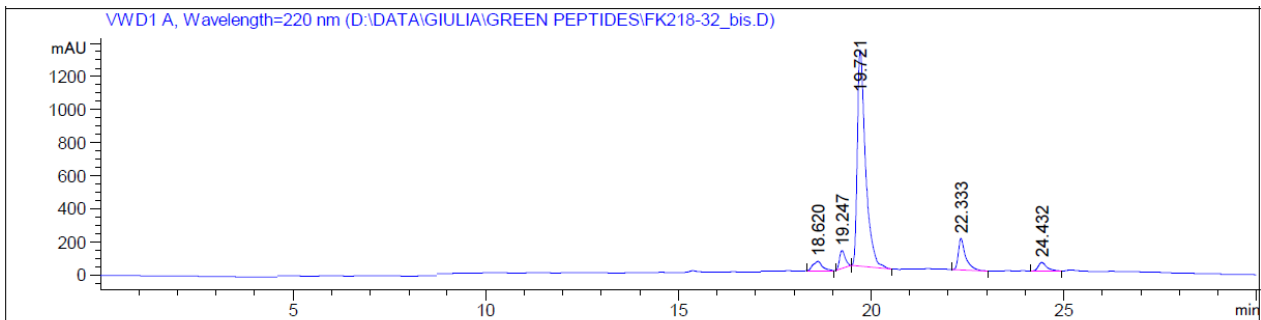

Signal 3: VWD1 A, Wavelength=220 nm

| Peak # | RetTime [min] | Type | Width [min] | Area [mAU*s] | Height [mAU] | Area %  |
|--------|---------------|------|-------------|--------------|--------------|---------|
| 1      | 18.620        | BB   | 0.2310      | 956.72913    | 56.67263     | 3.8480  |
| 2      | 19.247        | BB   | 0.1570      | 1105.90088   | 108.45225    | 4.4480  |
| 3      | 19.721        | BB   | 0.2217      | 1.94325e4    | 1305.05444   | 78.1583 |
| 4      | 22.333        | BB   | 0.1933      | 2539.91138   | 190.86345    | 10.2156 |
| 5      | 24.432        | BB   | 0.2317      | 827.98010    | 53.17313     | 3.3302  |

Totals : 2.48630e4 1714.21590

| Peptide                             | Rt (min) | Area (%) |
|-------------------------------------|----------|----------|
| Linear Octreotide N,O-shift 2       | 18.620   | 3.8      |
| Linear Octreotide + CO <sub>2</sub> | 19.247   | 4.4      |
| Linear Octreotide                   | 19.721   | 78.2     |
| Linear Octreotide+tBu               | 22.333   | 10.2     |
| Linear Octreotide+tBu2              | 24.432   | 3.4      |

**Figure S94.** Chromatogram of linear Octreotide, manual SPPS in **NOP/DMC 8/2 with 10% DEAPA** as deprotection solution (swelling and first Fmoc removal at 40°C)

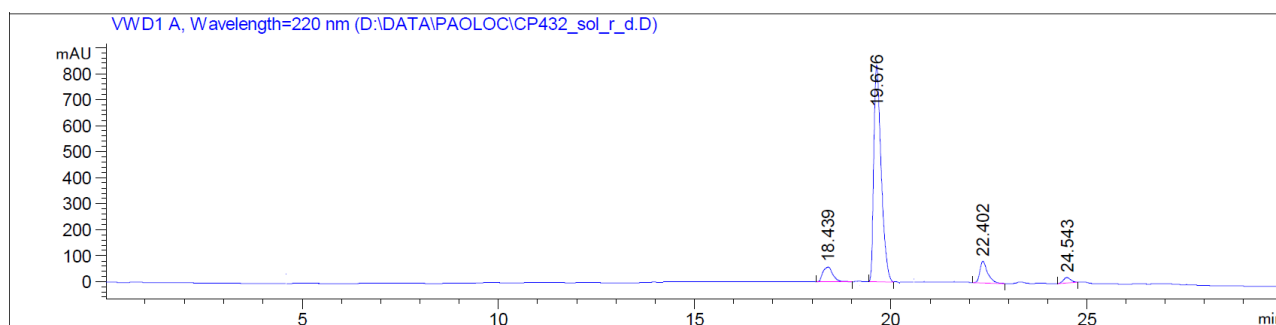

Signal 2: VWD1 A, Wavelength=220 nm

| Peak # | RetTime [min] | Type | Width [min] | Area [mAU*s] | Height [mAU] | Area %  |
|--------|---------------|------|-------------|--------------|--------------|---------|
| 1      | 18.439        | BB   | 0.2761      | 988.99408    | 56.52509     | 7.4996  |
| 2      | 19.676        | BB   | 0.1952      | 1.07978e4    | 833.08105    | 81.8802 |
| 3      | 22.402        | BB   | 0.2005      | 1120.30371   | 82.48135     | 8.4953  |
| 4      | 24.543        | BB   | 0.2035      | 280.22736    | 21.30368     | 2.1250  |

Totals : 1.31873e4 993.39118

| Peptide                       | Rt (min) | Area (%) |
|-------------------------------|----------|----------|
| Linear Octreotide N,O-shift 2 | 18.439   | 7.5      |
| Linear Octreotide             | 19.676   | 81.9     |
| Linear Octreotide+tBu         | 22.402   | 8.5      |
| Linear Octreotide+tBu2        | 24.543   | 2.1      |

**Figure S95.** Chromatogram of linear Octreotide, manual SPPS at 40°C in NOP/DMC 80:20 with 10% DEAPA as deprotection solution

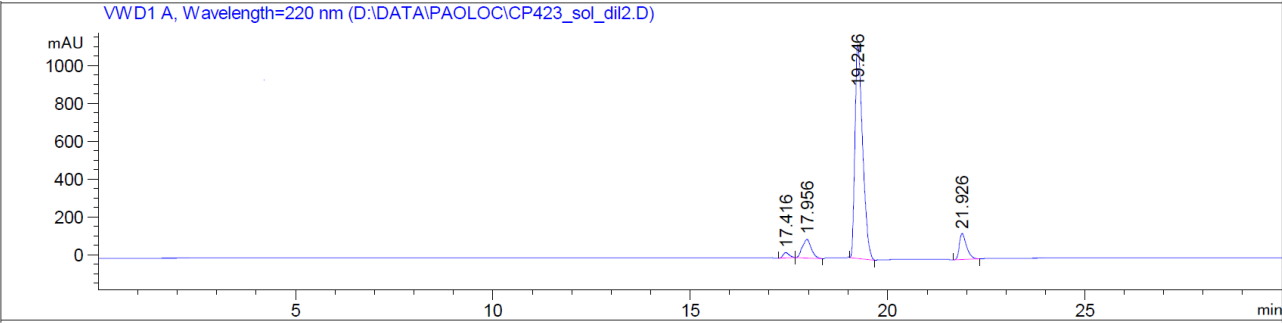

Signal 2: VWD1 A, Wavelength=220 nm

| Peak # | RetTime [min] | Type | Width [min] | Area [mAU*s] | Height [mAU] | Area %  |
|--------|---------------|------|-------------|--------------|--------------|---------|
| 1      | 17.416        | BB   | 0.1721      | 316.09729    | 28.35434     | 1.6695  |
| 2      | 17.956        | BB   | 0.2228      | 1543.02795   | 98.46199     | 8.1498  |
| 3      | 19.246        | BB   | 0.2065      | 1.53523e4    | 1130.12085   | 81.0866 |
| 4      | 21.926        | BB   | 0.1883      | 1721.79199   | 137.30876    | 9.0940  |

Totals : 1.89333e4 1394.24594

| Peptide                       | Rt (min) | Area (%) |
|-------------------------------|----------|----------|
| Linear Octreotide N,O-shift 1 | 17.416   | 1.7      |
| Linear Octreotide N,O-shift 2 | 17.956   | 8.1      |
| Linear Octreotide             | 19.246   | 81.1     |
| Linear Octreotide+tBu         | 21.926   | 9.1      |

**Figure S96.** Mass spectrum of linear Octreotide

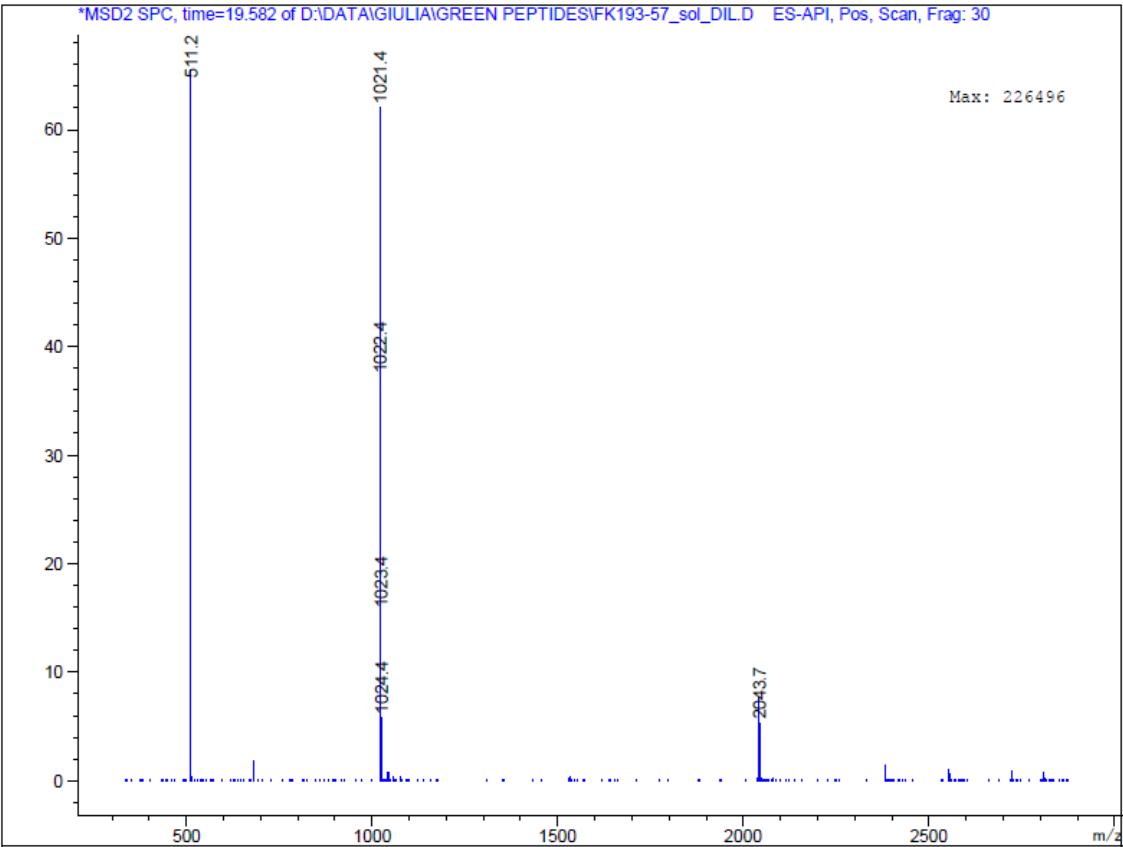

**Figure S97.** Mass spectrum of linear Octreotide+CO<sub>2</sub>

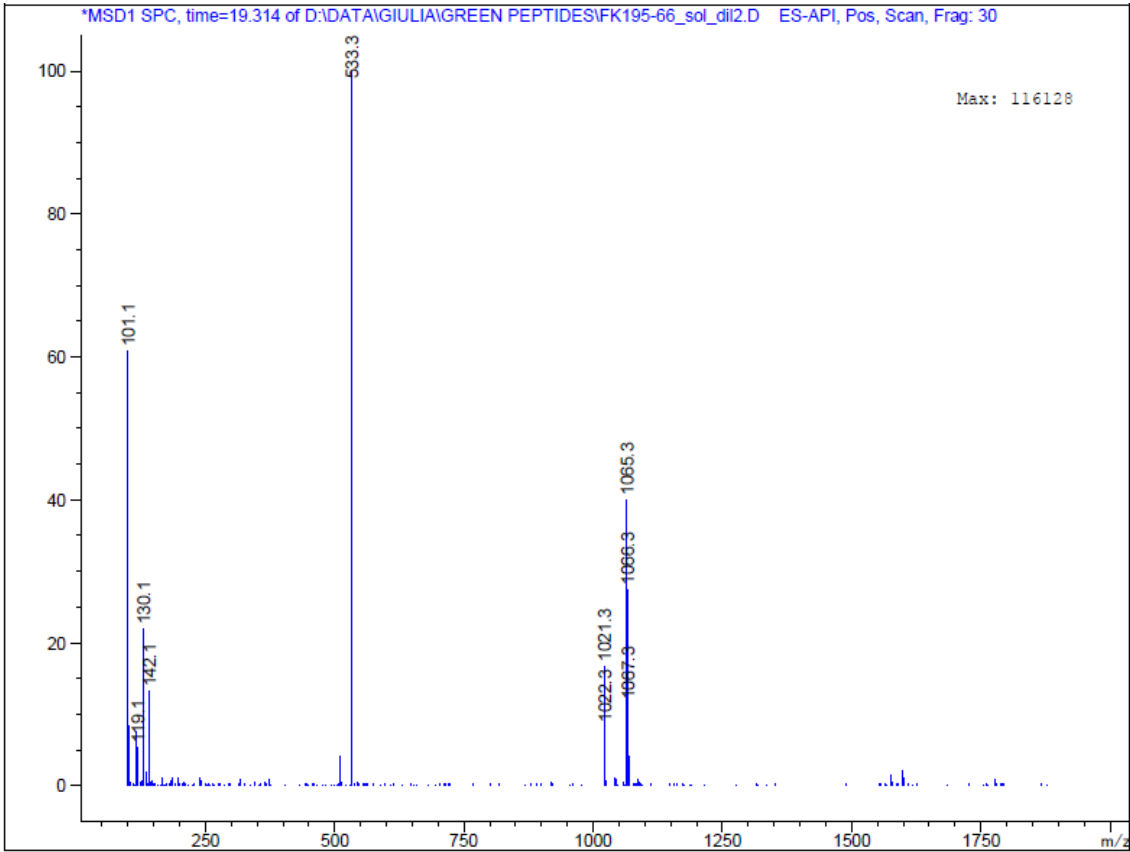

**Figure S98.** Mass spectrum of linear Octreotide+tBu

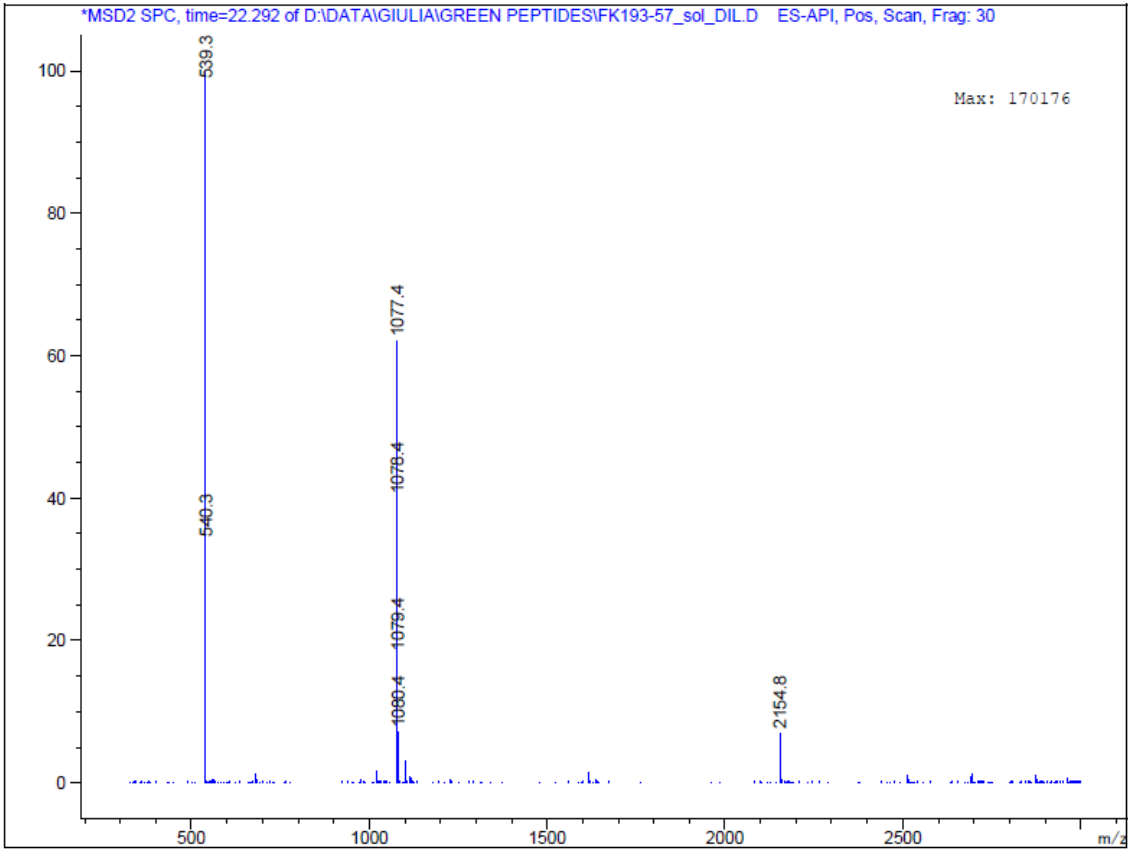

**Figure S99.** Mass spectrum of H<sub>2</sub>N-D-Phe-Cys<sup>2</sup>-Phe-D-Trp-Lys-Thr-Thr-ol (des-Cys<sup>7</sup>)

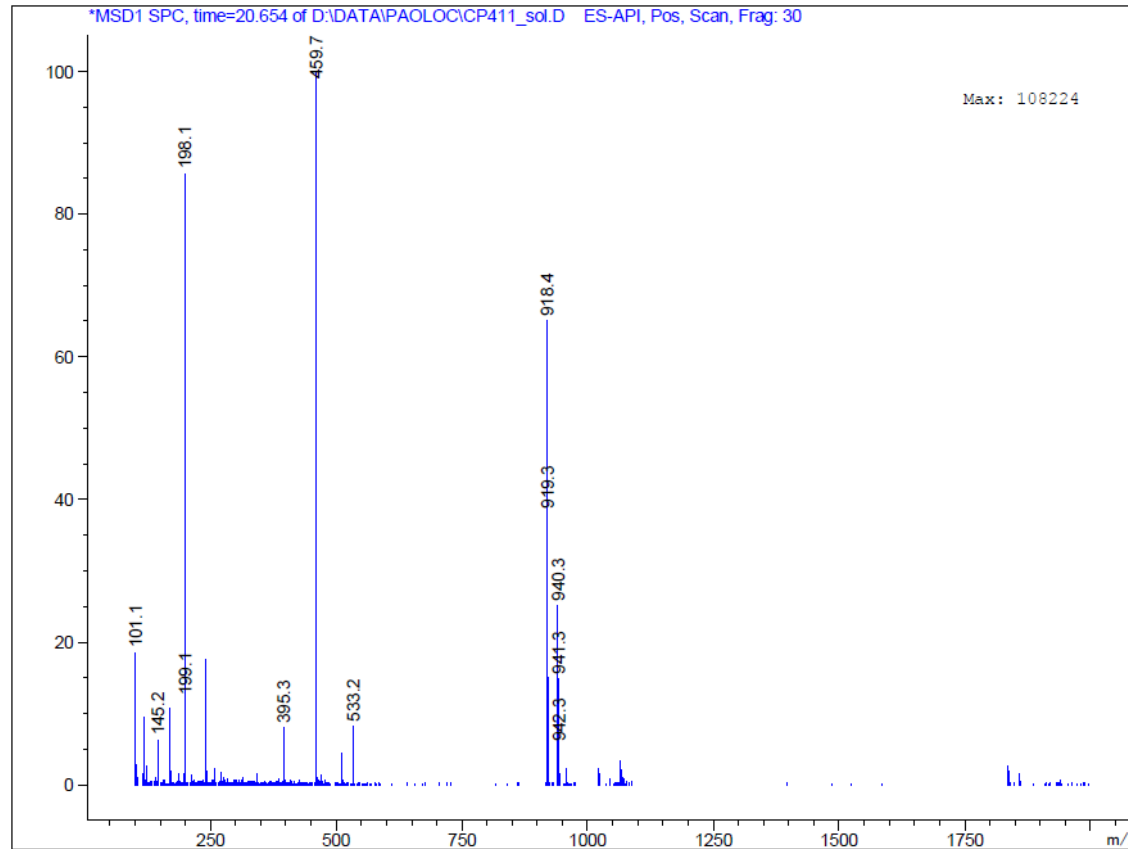

## Solvent and base recovery from waste stream of linear Octreotide SPPS

### *General considerations*

Solid phase peptide syntheses of linear Octreotide (see Table 8) were performed using the same procedure in all cases (both for manually and automated processes), except for the employed solvent, according to the protocol reported in the Experimental Section. The scale of the syntheses was 0.22 mmol in all cases, and the amount of the yielded crude linear Octreotide was comparable for all processes. Therefore, crude mass of linear Octreotide was considered to be the same in all cases (0.204 g) for PMI calculations. The total amount of solvent consumption derived from the different SPPS was the same in all cases; when the mixture NOP/DMC 8/2 was used, the ratio between the two solvents was maintained along all the synthetic steps.

Methods of linear Octreotide SPPS reported in Table 8 are compared to calculate the PMI of the processes: i) conventional synthesis in DMF; ii) synthesis in NOP at RT with 4 hours swelling time; iii) synthesis in NOP at 40°C; iv) synthesis in NOP/DMC 8/2 at RT (swelling and first deprotection at 40°C); v) synthesis in NOP/DMC 8/2 at 40°C. In cases from ii) to v), coupling and deprotection stream wastes were distilled separately to obtain recovery of solvent or of solvent and base, respectively, as reported in the Experimental Section.

### *PMI calculations for linear Octreotide SPPS*

Process Mass Intensity (PMI) is defined as the ratio between the total mass of materials and the mass of the isolated product as reported below:

$$PMI = \frac{\sum \text{mass of materials}}{\text{mass of isolated product}}$$

In our case, the total mass of materials includes:

- Starting materials: Fmoc-AA-OH, DIC, OxymaPure®, resin, TFA + scavengers (TIPS, 1-dodecanthiol)
- Solvents: DMF or NOP or NOP/DMC 8/2, DCM (for washings of the resin pre-cleavage) and Et<sub>2</sub>O (for crude peptide precipitation)
- Base (DEAPA)

The total mass of starting materials, base, DCM and Et<sub>2</sub>O does not change along all SPPS independently from the solvent employed for the synthesis; an overview of these “fixed” reactants with their relative masses is reported in Table S2; when the syntheses were performed at 40°C, the amount of employed Fmoc-AA-OH, DIC and OxymaPure® was halved; accordingly, the PMI slightly decreases in these cases (Table S3)

The total mass of the solvent employed for the synthesis (DMF or NOP or NOP/DMC 8/2), even if does not change in volume, slightly changes according to solvents’ different densities; an overview of the employed solvents with their relative masses is reported in Table S4.

An overview of the total mass of materials employed in the syntheses at RT and at 40°C with no solvent and base recovery is reported in Table S5 and Table S6, respectively.

**Table S2.** Overview of starting materials, base, DCM and Et<sub>2</sub>O employed in **SPPS of linear Octreotide at RT** and their relative masses

|                                          | MW<br>(g/mol) | d<br>(g/mL) | eq | mmol | Volume<br>(mL) | Mass<br>(g) | repetitions  | Total mass<br>(g) |
|------------------------------------------|---------------|-------------|----|------|----------------|-------------|--------------|-------------------|
| Fmoc-Thr(tBu)-ol-Trt-<br>PS resin        |               |             | 1  | 0,22 |                | 0,2         | 1            | 0,2               |
| <b><i>Coupling</i></b>                   |               |             |    |      |                |             |              |                   |
| Fmoc-Cys(Trt)-OH                         | 585,71        |             | 3  | 0,66 |                | 0,39        | 3            | 1,16              |
| Fmoc-Thr(tBu)-OH                         | 397,43        |             | 3  | 0,66 |                | 0,26        | 1            | 0,26              |
| Fmoc-Lys(Boc)-OH                         | 468,54        |             | 3  | 0,66 |                | 0,31        | 1            | 0,31              |
| Fmoc-D-Trp(Boc)-OH                       | 526,28        |             | 3  | 0,66 |                | 0,35        | 1            | 0,35              |
| Fmoc-Phe-OH                              | 387,43        |             | 3  | 0,66 |                | 0,26        | 1            | 0,26              |
| Fmoc-D-Phe-OH                            | 387,43        |             | 3  | 0,66 |                | 0,26        | 1            | 0,26              |
| OxymaPure                                | 142,11        |             | 3  | 0,66 |                | 0,09        | 8            | 0,75              |
| DIC                                      | 126,2         | 0,815       | 3  | 0,66 |                | 0,08        | 8            | 0,67              |
| <b><i>Deprotection</i></b>               |               |             |    |      |                |             |              |                   |
| DEAPA                                    | 130,23        | 0,826       |    |      | 0,2            | 0,165       | 16           | 2,64              |
| <b><i>Cleavage and precipitation</i></b> |               |             |    |      |                |             |              |                   |
| TFA                                      | 114,02        | 1,489       |    |      | 4,50           | 6,70        | 1            | 6,70              |
| TIPS                                     | 158,36        | 0,773       |    |      | 0,25           | 0,19        | 1            | 0,19              |
| 1-dodecanthiol                           | 18,02         | 0,997       |    |      | 0,25           | 0,21        | 1            | 0,21              |
| DCM                                      | 84,93         | 1,325       |    |      | 2              | 2,65        | 3            | 7,95              |
| Et <sub>2</sub> O                        | 102,17        | 0,725       |    |      | 25             | 18,13       | 1            | 18,13             |
|                                          |               |             |    |      |                |             | <b>Total</b> | <b>40,03</b>      |

**Table S3.** Overview of starting materials, base, DCM and Et<sub>2</sub>O employed in **SPPS of linear Octreotide at 40°C** and their relative masses

|                                          | MW<br>(g/mol) | d<br>(g/mL) | eq  | mmol | Volume<br>(mL) | Mass<br>(g) | repetitions  | Total mass<br>(g) |
|------------------------------------------|---------------|-------------|-----|------|----------------|-------------|--------------|-------------------|
| Fmoc-Thr(tBu)-ol-Trt-<br>PS resin        |               |             | 1   | 0,22 |                | 0,2         | 1            | 0,2               |
| <b><i>Coupling</i></b>                   |               |             |     |      |                |             |              |                   |
| Fmoc-Cys(Trt)-OH                         | 585,71        |             | 1,5 | 0,33 |                | 0,19        | 3            | 0,58              |
| Fmoc-Thr(tBu)-OH                         | 397,43        |             | 1,5 | 0,33 |                | 0,13        | 1            | 0,13              |
| Fmoc-Lys(Boc)-OH                         | 468,54        |             | 1,5 | 0,33 |                | 0,15        | 1            | 0,15              |
| Fmoc-D-Trp(Boc)-OH                       | 526,28        |             | 1,5 | 0,33 |                | 0,17        | 1            | 0,17              |
| Fmoc-Phe-OH                              | 387,43        |             | 1,5 | 0,33 |                | 0,13        | 1            | 0,13              |
| Fmoc-D-Phe-OH                            | 387,43        |             | 1,5 | 0,33 |                | 0,13        | 1            | 0,13              |
| OxymaPure                                | 142,11        |             | 1,5 | 0,33 |                | 0,05        | 8            | 0,38              |
| DIC                                      | 126,2         | 0,815       | 1,5 | 0,33 |                | 0,04        | 8            | 0,33              |
| <b><i>Deprotection</i></b>               |               |             |     |      |                |             |              |                   |
| DEAPA                                    | 130,23        | 0,826       |     |      | 0,2            | 0,165       | 16           | 2,64              |
| <b><i>Cleavage and precipitation</i></b> |               |             |     |      |                |             |              |                   |
| TFA                                      | 114,02        | 1,489       |     |      | 4,50           | 6,70        | 1            | 6,70              |
| TIPS                                     | 158,36        | 0,773       |     |      | 0,25           | 0,19        | 1            | 0,19              |
| 1-dodecanthiol                           | 18,02         | 0,997       |     |      | 0,25           | 0,21        | 1            | 0,21              |
| DCM                                      | 84,93         | 1,325       |     |      | 2              | 2,65        | 3            | 7,95              |
| Et <sub>2</sub> O                        | 102,17        | 0,725       |     |      | 25             | 18,13       | 1            | 18,13             |
|                                          |               |             |     |      |                |             | <b>Total</b> | <b>38,02</b>      |

**Table S4.** Overview of the solvents (DMF, NOP or NOP/DMC 8/2) employed in SPPS of linear Octreotide at RT and 40°C and their relative masses

|                                 | MW<br>(g/mol) | d<br>(g/mL) | Volume<br>(mL) | Mass<br>(g) | repetitions  | Total mass<br>(g) |
|---------------------------------|---------------|-------------|----------------|-------------|--------------|-------------------|
| <b>DMF</b>                      |               |             |                |             |              |                   |
| DMF swelling                    | 73,09         | 0,944       | 2              | 1,9         | 1            | 1,89              |
| DMF couplings                   | 73,09         | 0,944       | 2,5            | 2,36        | 8            | 18,88             |
| DMF washings after couplings    | 73,09         | 0,944       | 4,5            | 4,25        | 7            | 29,74             |
| DMF deprotection                | 73,09         | 0,944       | 1,8            | 1,70        | 16           | 27,19             |
| DMF washings after deprotection | 73,09         | 0,944       | 4,5            | 4,25        | 8            | 33,98             |
|                                 |               |             |                |             | <b>Total</b> | <b>111,68</b>     |
| <b>NOP</b>                      |               |             |                |             |              |                   |
| NOP swelling                    | 197,32        | 0,92        | 2              | 1,80        | 1            | 1,84              |
| NOP couplings                   | 197,32        | 0,92        | 2,5            | 2,30        | 8            | 18,40             |
| NOP washings after couplings    | 197,32        | 0,92        | 4,5            | 4,14        | 7            | 28,98             |
| NOP deprotection                | 197,32        | 0,92        | 1,8            | 1,66        | 16           | 26,50             |
| NOP washings after deprotection | 197,32        | 0,92        | 4,5            | 4,14        | 8            | 33,12             |
|                                 |               |             |                |             | <b>Total</b> | <b>108,84</b>     |
| <b>NOP/DMC 8/2</b>              |               |             |                |             |              |                   |
| NOP swelling                    | 197,32        | 0,92        | 1,6            | 1,5         | 1            | 1,47              |
| NOP couplings                   | 197,32        | 0,92        | 2              | 1,84        | 8            | 14,72             |
| NOP washings after couplings    | 197,32        | 0,92        | 3,6            | 3,31        | 7            | 23,18             |
| DMC swelling                    | 90,08         | 1,07        | 0,4            | 0,43        | 7            | 3,00              |
| DMC couplings                   | 90,08         | 1,07        | 0,5            | 0,54        | 7            | 3,75              |
| DMC washings after couplings    | 90,08         | 1,07        | 0,9            | 0,96        | 7            | 6,74              |
| NOP deprotection                | 197,32        | 0,92        | 1,44           | 1,32        | 16           | 21,20             |
| NOP washings after deprotection | 197,32        | 0,92        | 3,6            | 3,312       | 8            | 26,50             |
| DMC deprotection                | 90,08         | 1,07        | 0,36           | 0,39        | 16           | 6,16              |
| DMC washings after deprotection | 90,08         | 1,07        | 0,9            | 0,963       | 8            | 7,70              |
|                                 |               |             |                |             | <b>Total</b> | <b>114,42</b>     |

**Table S5.** Overview of total mass of materials employed for SPPS of linear Octreotide at RT without recycling

|                                              | SPPS solvent |              |              |
|----------------------------------------------|--------------|--------------|--------------|
|                                              | DMF          | NOP          | NOP/DMC 8/2  |
| $\Sigma$ starting materials <sup>a</sup> (g) | 11,3         | 11,3         | 11,3         |
| $\Sigma$ solvents <sup>b</sup> (g)           | 137,8        | 134,9        | 140,5        |
| $\Sigma$ base (g)                            | 2,6          | 2,6          | 2,6          |
| <b>Total (g)</b>                             | <b>151,7</b> | <b>148,8</b> | <b>154,4</b> |

<sup>a</sup>Starting materials include Fmoc-AA-OH, DIC, Oxyma Pure®, resin, cleavage cocktail (TFA+scavengers)

<sup>b</sup>Solvents include DCM and Et<sub>2</sub>O

**Table S6.** Overview of total mass of materials employed for SPPS of linear Octreotide at 40°C without recycling

|                                              | SPPS solvent |              |
|----------------------------------------------|--------------|--------------|
|                                              | NOP          | NOP/DMC 8/2  |
| $\Sigma$ starting materials <sup>a</sup> (g) | 9,3          | 9,3          |
| $\Sigma$ solvents <sup>b</sup> (g)           | 134,9        | 140,5        |
| $\Sigma$ base (g)                            | 2,6          | 2,6          |
| <b>Total (g)</b>                             | <b>146,8</b> | <b>152,4</b> |

<sup>a</sup>Starting materials include Fmoc-AA-OH, DIC, Oxyma Pure®, resin, cleavage cocktail (TFA+scavengers)

<sup>b</sup>Solvents include DCM and Et<sub>2</sub>O

#### *PMI calculations for linear Octreotide SPPS after solvents and base recovery*

When solvents (NOP or NOP/DMC 8/2) and base (DEAPA) were recovered, the value of the final PMI was calculated by subtracting the mass of recovery materials from the mass of used materials, according to the following equation:

$$PMI \text{ (for SPPS with recycling)} = \frac{\Sigma \text{ mass of materials} - \Sigma \text{ mass of recovered materials}}{\text{mass of isolated product}}$$

NOP was recovered with 85% yield, DMC with 95% yield, DEAPA with 92% yield. The residual 8% of DEAPA includes DEAPA involved in the formation of DBF-DEAPA adduct that is not recoverable. The amount of DBF-DEAPA adduct was estimated in 3% of the total DEAPA mass, considering a 38% conversion of DBF in DEAPA-DBF adduct at the end of a model SPPS (HPLC monitoring of deprotection stream waste at the end of a synthesis).

The amount of the total recovered mass of NOP or NOP/DMC 8/2 and DEAPA is reported in Table S7. Final PMI values for all considered SPPS are reported in Table 8 (main body text) and in Table S8 and S9.

**Table S7.** Total mass of solvents (NOP or NOP/DMC 8/2) and DEAPA employed for SPPS and their recovered mass

|                                           | SPPS solvent |              |
|-------------------------------------------|--------------|--------------|
|                                           | NOP          | NOP/DMC 8/2  |
| $\Sigma$ NOP (g)                          | 108,8        | 87,1         |
| $\Sigma$ NOP recovered (g)                | 92,5         | 74,0         |
| $\Sigma$ DMC (g)                          | -            | 27,4         |
| $\Sigma$ DMC recovered (g)                | -            | 26,0         |
| $\Sigma$ DEAPA (g)                        | 2,6          | 2,6          |
| $\Sigma$ base recovered (g)               | 2,4          | 2,4          |
| <b>Total solvents + base recycled (g)</b> | <b>94,9</b>  | <b>102,4</b> |

**Table S8.** PMI values for linear Octreotide SPPS processes at **RT**

|                                              | SPPS solvent |              |                        |                     |                                |
|----------------------------------------------|--------------|--------------|------------------------|---------------------|--------------------------------|
|                                              | DMF          | NOP (25)     | NOP (25) +<br>recovery | NOP/DMC 8/2<br>(25) | NOP/DMC 8/2 (25)<br>+ recovery |
| $\Sigma$ starting materials <sup>a</sup> (g) | 11,3         | 11,3         | 11,3                   | 11,3                | 11,3                           |
| $\Sigma$ solvents <sup>b</sup> (g)           | 137,8        | 134,9        | 42,4                   | 140,5               | 40,5                           |
| $\Sigma$ base (g)                            | 2,6          | 2,6          | 0,2                    | 2,6                 | 0,2                            |
| <b>PMI<sup>c</sup></b>                       | <b>743,7</b> | <b>729,7</b> | <b>264,3</b>           | <b>757,1</b>        | <b>254,6</b>                   |

<sup>a</sup>Starting materials include Fmoc-AA-OH, DIC, Oxyma Pure®, resin, cleavage cocktail (TFA + scavengers)

<sup>b</sup>Solvents include DCM and Et<sub>2</sub>O

<sup>c</sup>PMI =  $\Sigma m$  (starting materials) +  $\Sigma m$  (solvents) +  $\Sigma m$  (base) /  $m$  (crude linear Octreotide product)

**Table S9.** PMI values for linear Octreotide SPPS processes at **40°C**

|                                              | SPPS solvent |                        |                     |                                |
|----------------------------------------------|--------------|------------------------|---------------------|--------------------------------|
|                                              | NOP (40)     | NOP (40) +<br>recovery | NOP/DMC 8/2<br>(40) | NOP/DMC 8/2 (40)<br>+ recovery |
| $\Sigma$ starting materials <sup>a</sup> (g) | 9,3          | 9,3                    | 9,3                 | 9,3                            |
| $\Sigma$ solvents <sup>b</sup> (g)           | 134,9        | 42,4                   | 140,5               | 40,5                           |
| $\Sigma$ base (g)                            | 2,6          | 0,2                    | 2,6                 | 0,2                            |
| <b>PMI<sup>c</sup></b>                       | <b>719,9</b> | <b>254,5</b>           | <b>747,3</b>        | <b>245,0</b>                   |

<sup>a</sup>Starting materials include Fmoc-AA-OH, DIC, Oxyma Pure®, resin, cleavage cocktail (TFA + scavengers)

<sup>b</sup>Solvents include DCM and Et<sub>2</sub>O

<sup>c</sup>PMI =  $\Sigma m$  (starting materials) +  $\Sigma m$  (solvents) +  $\Sigma m$  (base) /  $m$  (crude linear Octreotide product)

Recovered NOP, DMC and DEAPA were assessed as having purities > 95% from  $^1\text{H}$  NMR (Figures S95-S97) and were re-used as such.

**Figure S100.**  $^1\text{H}$  NMR spectrum of NOP recovered from distillation

$^1\text{H}$  NMR (400 MHz,  $\text{CDCl}_3$ )  $\delta$  (ppm) 3.35 (t,  $J = 7.0$  Hz, 2H), 3.24 (t,  $J = 7.4$  Hz, 2H), 2.36 (t,  $J = 8.1$  Hz, 2H), 2.04 – 1.93 (m, 2H), 1.54 – 1.43 (m, 2H), 1.18 – 1.30 (m, 10H), 0.86 (t,  $J = 6.8$  Hz, 3H).

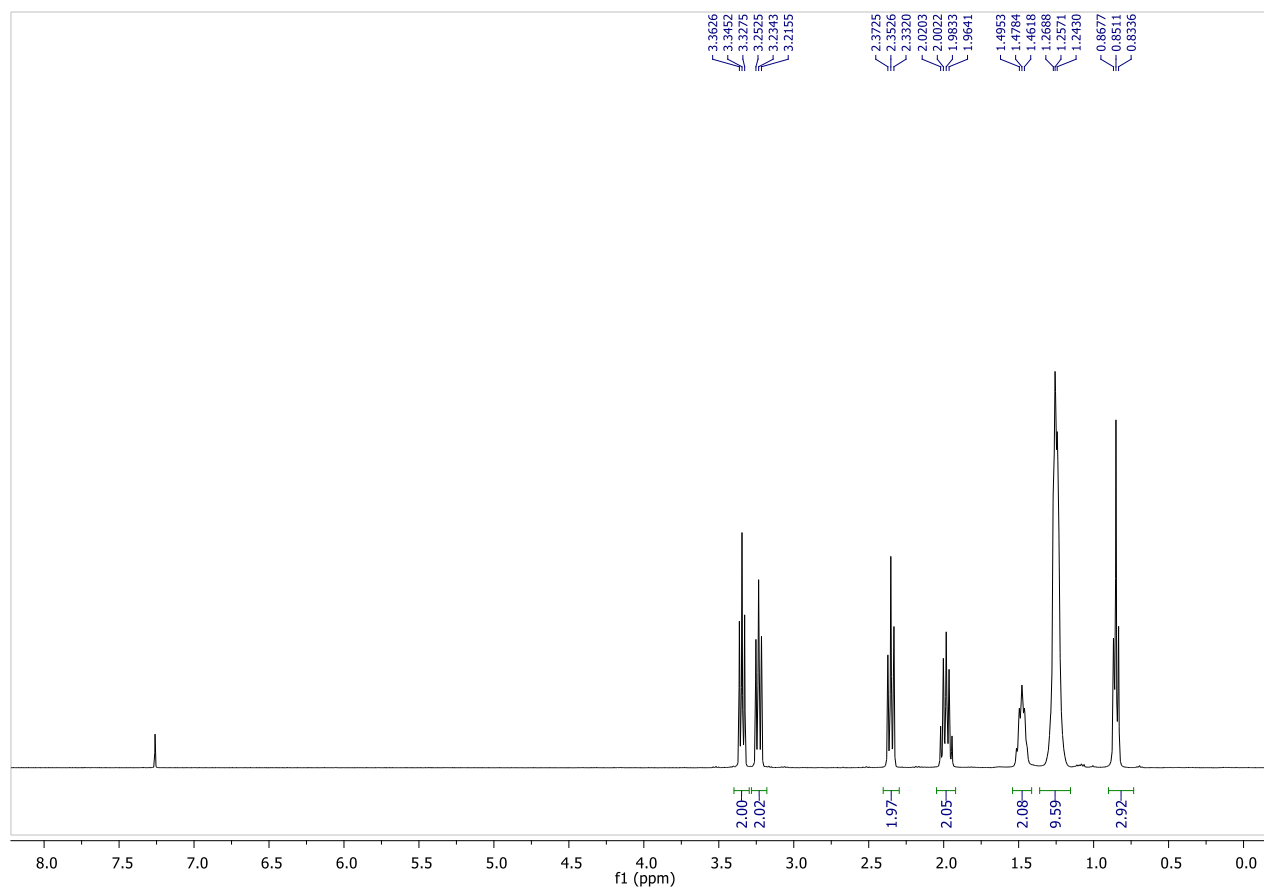

**Figure S101.**  $^1\text{H}$  NMR spectrum of DMC recovered from distillation

$^1\text{H}$  NMR (400 MHz,  $\text{CDCl}_3$ )  $\delta$  (ppm) 3.75 (s, 6H)

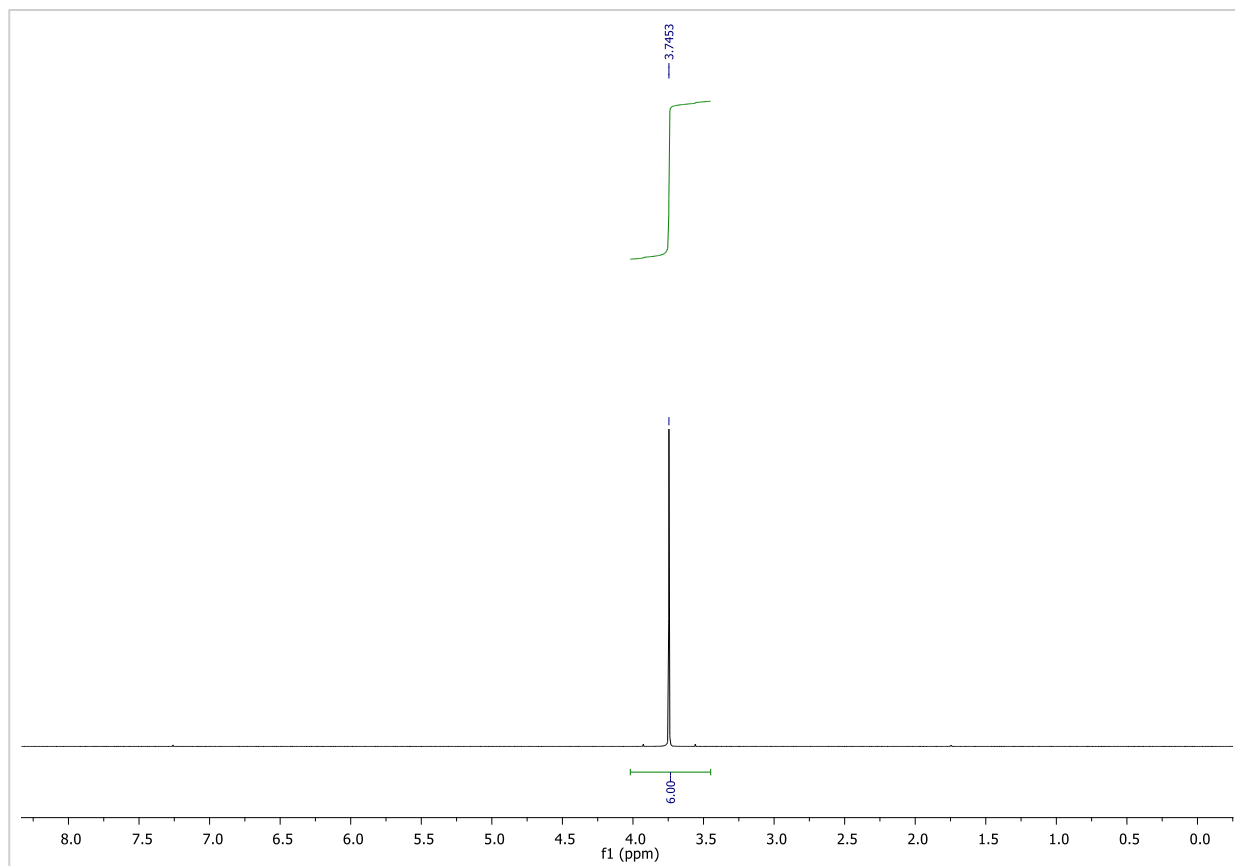

**Figure S102.**  $^1\text{H}$  NMR spectrum of DEAPA recovered from distillation

$^1\text{H}$  NMR (400 MHz,  $\text{CDCl}_3$ )  $\delta$  (ppm) 2.84 (bs, 2H), 2.79 (t,  $J = 6.6$  Hz, 2H), 2.52 (dt,  $J = 12.4, 7.2$  Hz, 6H), 1.68 – 1.58 (m, 2H), 1.02 (t,  $J = 7.2$  Hz, 6H).

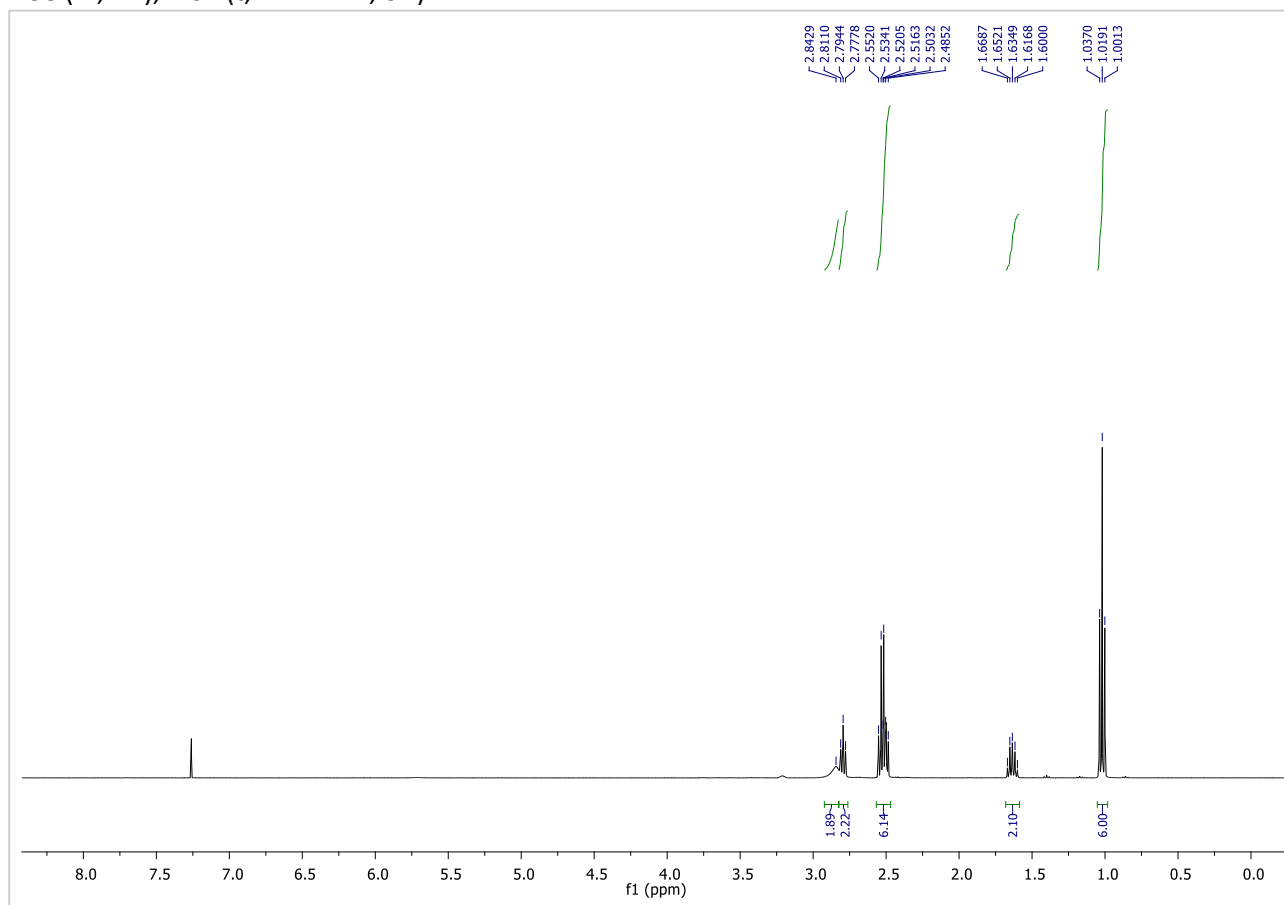

Supplement: d1gc02634h1.pdf [file d1gc02634h1.pdf]
